# Supplementary material
Source: PubMed Central journal article supplement (PMC5820133)
Supplement: NIHMS920579-supplement-Supplemental_Materials.pdf [file NIHMS920579-supplement-Supplemental_Materials.pdf]

**Supplementary Figure 1. Lactate Dehydrogenase (LDH) assay in hepaRG cells.**

HepRG cells were treated with 5 mM or 20 mM APAP and LDH assays were performed at different time points. Treatment with 5 mM APAP increased LDH at 12 h and 24 compared to control ( $p \leq 0.0001$ ). The 20 mM APAP treatment also increased LDH activity with peak levels at 24 h time point ( $p \leq 0.0001$ ). All experiments were run in triplicates.

**Supplementary Figure 2. Top 10 pathways of 1,194 up-regulated genes (a) and 1,564 down-regulated genes (b) listed in IPA analysis.** The y-axis (*left*) indicates the ratio of number of deregulated genes mapping to specific pathway, and the y-axis (*right*) indicates the *P* value calculated by Benjamini-Hochberg Multiple Testing Correction.

**Supplementary Figure 3. MiRNAs suppressed the luciferase activities produced by the wild 3'-UTR of CYP3A4 (a), HNF1A (b), HNF4A (c) or NR1I2 (d), respectively.** Constructs containing the wild or mutated 3'-UTR of *CYP3A4*, *HNF1A*, *HNF4A* or *NR1I2* were transiently transfected into HEK 293T and HepG2 cells, together with 40 nmol/L cognate miRNA mimic or miRNA negative control, respectively. Three independent experiments, each in triplicate, were conducted. \*  $P < 0.05$ ; \*\*  $P < 0.001$  NC, miRNA negative control.

**Supplementary Figure 4. The specific siRNAs reduced the mRNA and protein levels of HNF1A (a) , HNF4A (b) and NR1I2 (c), respectively.** Each assay was carried out in triplicate. Data are shown as relative mRNA and protein levels normalized by GAPDH levels. \*\*  $P < 0.001$ ; NC, miRNA negative control.

# Supplementary Figure 1

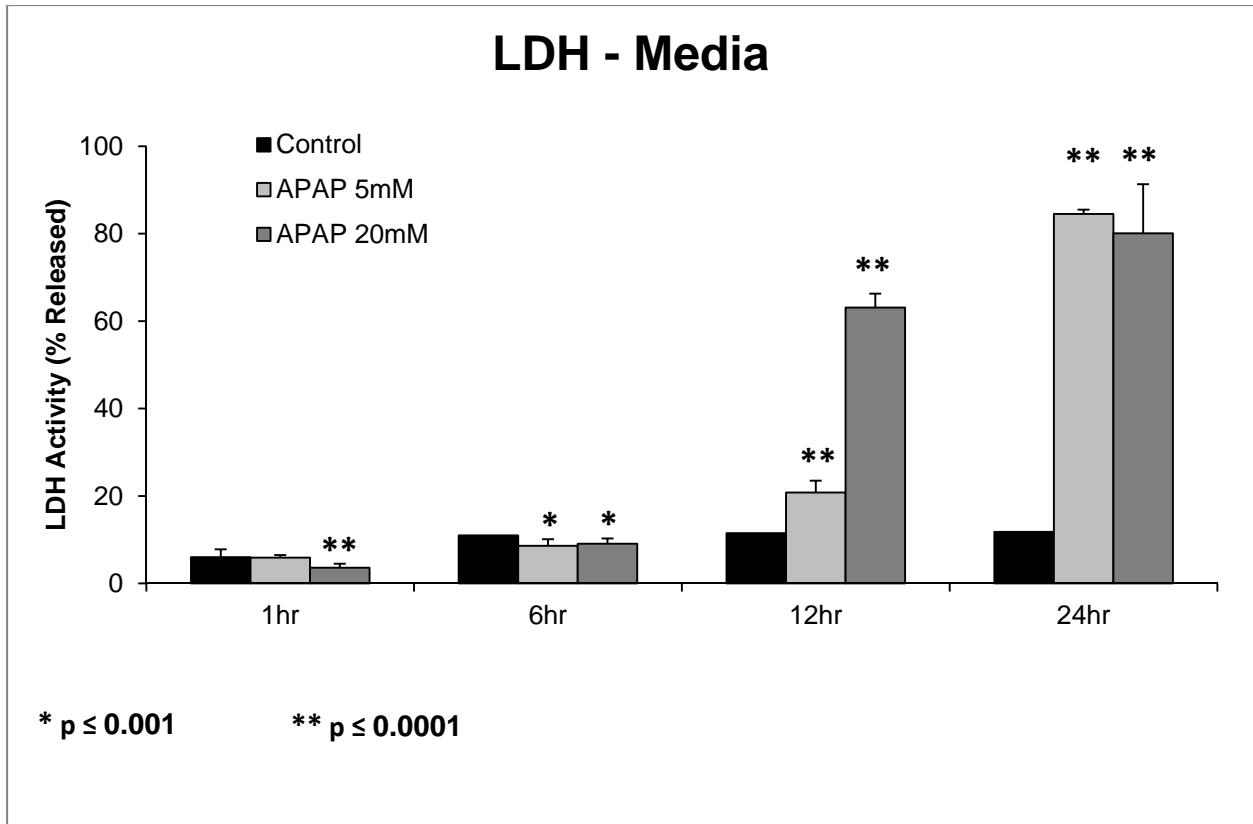

# Supplementary Figure 2

**a**

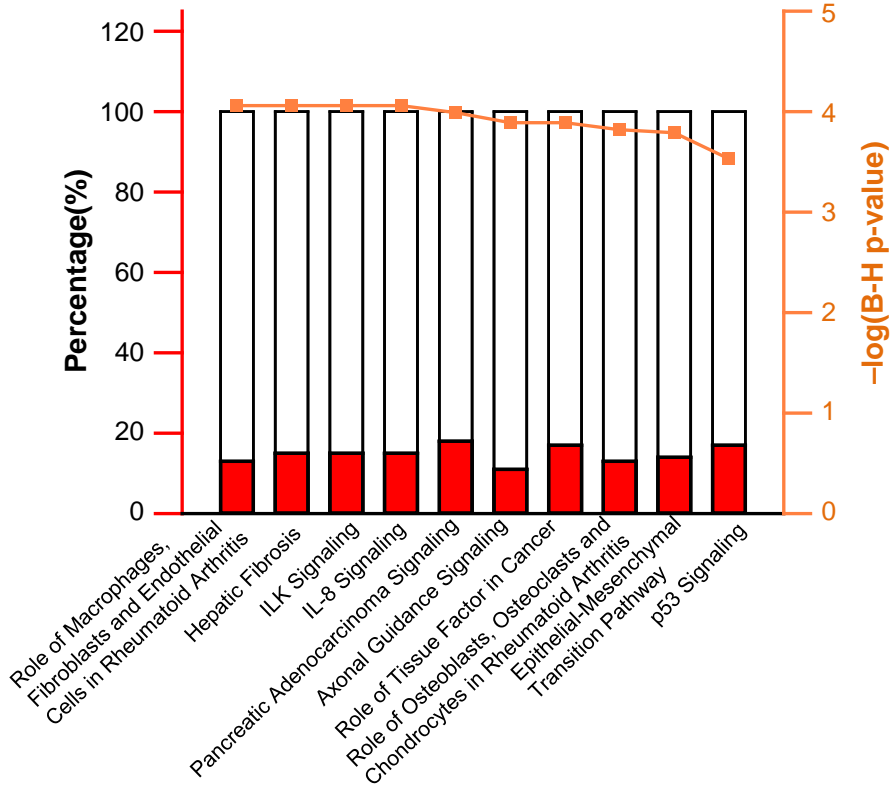

**b**

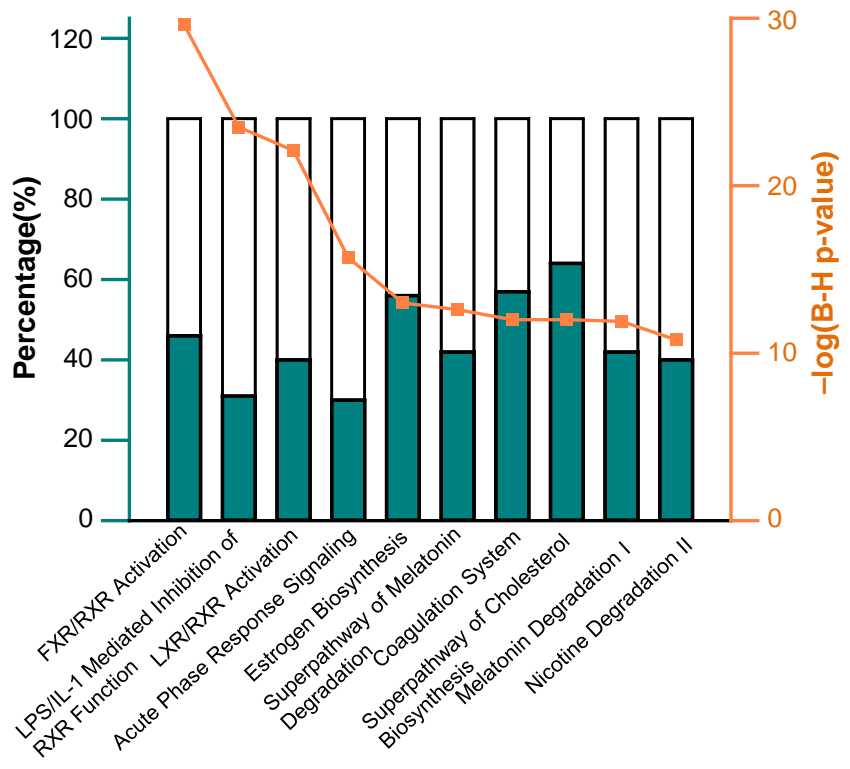

# Supplementary Figure 3

**a**

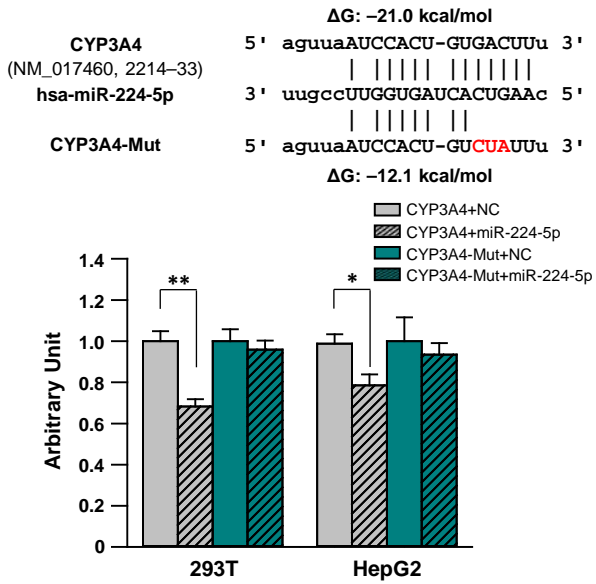

**b**

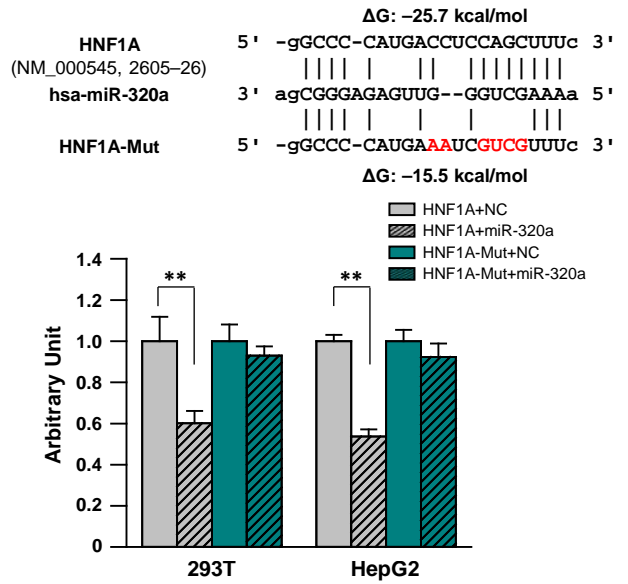

**c**

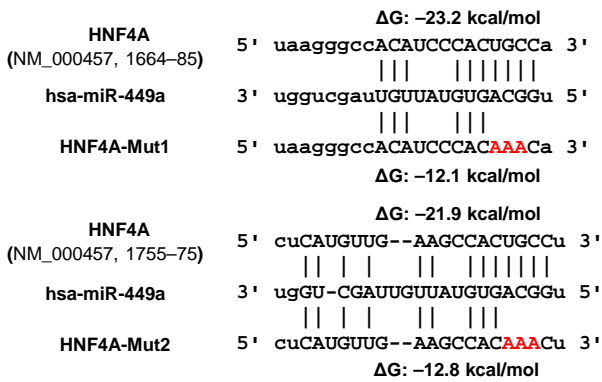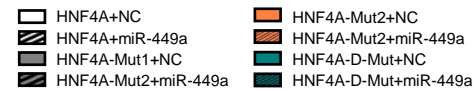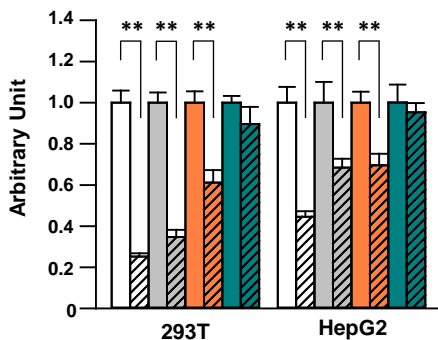

**d**

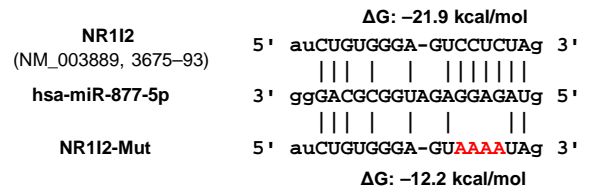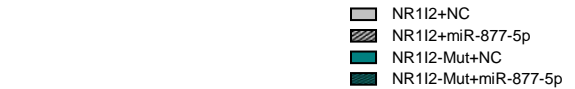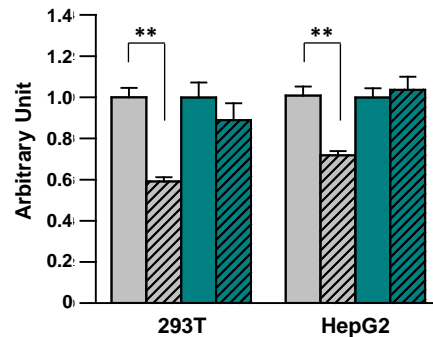

# Supplementary Figure 4

a

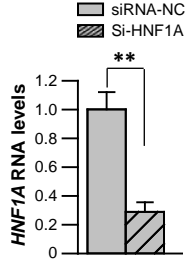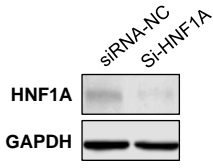

b

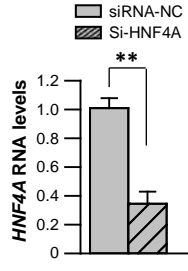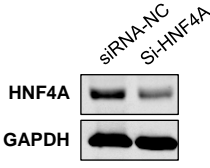

c

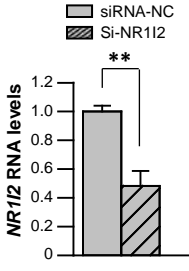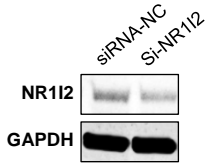

Supplementary Table 1

## Deregulated genes in HepaRG cells exposed to 10 mM APAP (Fold change&gt;2)

| Gene Symbol | Gene Locus                | Gene Name                                                      | Fold changes (5mM APAP) | Fold changes (10 mM APAP) |
|-------------|---------------------------|----------------------------------------------------------------|-------------------------|---------------------------|
| A1CF        | chr10:52559047-5264535    | APOBEC1 complementation factor                                 | 0.271                   | 0.031                     |
| AACS        | chr12:125549924-125627871 | acetoacetyl-CoA synthetase                                     | 1.832                   | 2.205                     |
| AADAC       | chr3:151347319-151546276  | arylacetyl-CoA deacetylase                                     | 0.322                   | 0.036                     |
| AAK1        | chr2:69685126-70053596    | AP2 associated kinase 1                                        | 1.743                   | 2.861                     |
| AARS        | chr16:70280724-70323438   | alanyl-tRNA synthetase                                         | 2.252                   | 3.467                     |
| AASS        | chr7:121713388-121784344  | aminoadipate-semialdehyde synthase                             | 0.381                   | 0.336                     |
| ABAT        | chr16:8768443-8878432     | 4-aminobutyrate aminotransferase                               | 0.366                   | 0.126                     |
| ABCA1       | chr9:107543177-107707472  | ATP binding cassette subfamily A member 1                      | 0.28                    | 0.189                     |
| ABCA12      | chr2:215976265-216003308  | ATP binding cassette subfamily A member 12                     | 0.722                   | 0.227                     |
| ABCA3       | chr16:2325783-2390747     | ATP binding cassette subfamily A member 3                      | 3.698                   | 4.946                     |
| ABCA6       | chr17:67074817-67138015   | ATP binding cassette subfamily A member 6                      | 0.212                   | 0.04                      |
| ABCB4       | chr7:87031171-87461646    | ATP binding cassette subfamily B member 4                      | 0.164                   | 0.032                     |
| ABCB7       | chrX:74270462-74376277    | ATP binding cassette subfamily B member 7                      | 0.579                   | 0.342                     |
| ABCC2       | chr10:101542178-101613520 | ATP binding cassette subfamily C member 2                      | 0.33                    | 0.027                     |
| ABCC6       | chr16:16243253-16317625   | ATP binding cassette subfamily C member 6                      | 0.318                   | 0.126                     |
| ABCC6P1     | chr16:18582506-18609629   | ATP binding cassette subfamily C member 6 pseudogene 1         | 0.26                    | 0.068                     |
| ABCC6P2     | chr16:14908173-14918610   | ATP binding cassette subfamily C member 6 pseudogene 2         | 0.239                   | 0.096                     |
| ABCC9       | chr12:21950323-22094668   | ATP binding cassette subfamily C member 9                      | 0.516                   | 0.379                     |
| ABCG1       | chr2:43619798-43718025    | ATP binding cassette subfamily G member 1                      | 3.271                   | 5.315                     |
| ABCG2       | chr4:89011415-89152474    | ATP binding cassette subfamily G member 2 (Junior blood group) | 0.395                   | 0.118                     |
| ABCG5       | chr2:44039610-44110328    | ATP binding cassette subfamily G member 5                      | 0.057                   | 0.001                     |
| ABCG8       | chr2:44039610-44110328    | ATP binding cassette subfamily G member 8                      | 0.033                   | 0.001                     |
| ABHD14A     | chr3:52002525-52023218    | abhydrolase domain containing 14A                              | 0.294                   | 0.188                     |
| ABHD2       | chr15:89631380-89745642   | abhydrolase domain containing 2                                | 0.563                   | 0.425                     |
| ABHD3       | chr18:19230857-19284893   | abhydrolase domain containing 3                                | 1.659                   | 2.053                     |
| ABL1        | chr9:133588305-133765535  | ABL proto-oncogene 1, non-receptor tyrosine kinase             | 1.454                   | 2.181                     |
| ABL2        | chr11:179068322-179198819 | ABL proto-oncogene 2, non-receptor tyrosine kinase             | 1.308                   | 2.183                     |
| ABP1        | chr7:150549564-150558379  | amine oxidase, copper containing 1                             | 0.42                    | 0.119                     |
| ABRACL      | chr6:139348013-139364439  | ABRA C-terminal like                                           | 0.319                   | 0.186                     |
| ABTB2       | chr1:34127104-34379666    | ankyrin repeat and BTB domain containing 2                     | 2.111                   | 3.447                     |
| ACAA1       | chr3:38080695-38178733    | acetyl-CoA acyltransferase 1                                   | 0.493                   | 0.22                      |
| ACACB       | chr12:109548959-109706030 | acetyl-CoA carboxylase beta                                    | 0.421                   | 0.32                      |
| ACAD9       | chr3:128598332-128634437  | acyl-CoA dehydrogenase family member 9                         | 0.646                   | 0.407                     |
| ACADL       | chr2:210867304-211091474  | acyl-CoA dehydrogenase, long chain                             | 0.426                   | 0.336                     |
| ACADM       | chr1:76190042-76229355    | acyl-CoA dehydrogenase, C-4 to C-12 straight chain             | 0.54                    | 0.351                     |
| ACADS       | chr12:121163570-121177811 | acyl-CoA dehydrogenase, C-2 to C-3 short chain                 | 0.622                   | 0.416                     |
| ACADS8      | chr10:124768428-124817806 | acyl-CoA dehydrogenase, short/branched chain                   | 0.531                   | 0.275                     |
| ACAT1       | chr11:107879341-108018891 | acetyl-CoA acetyltransferase 1                                 | 0.582                   | 0.3                       |
| ACAT2       | chr6:160181290-160210735  | acetyl-CoA acetyltransferase 2                                 | 0.284                   | 0.202                     |
| ACBD7       | chr10:15117473-15130775   | acyl-CoA binding domain containing 7                           | 1.405                   | 2.043                     |
| ACER2       | chr9:19408924-19455158    | alkaline ceramidase 2                                          | 1.692                   | 2.649                     |
| ACMSD       | chr2:135595889-135716915  | aminocarboxymuconate semialdehyde decarboxylase                | 0.173                   | 0.02                      |
| ACO1        | chr9:32324890-32450877    | aconitase 1                                                    | 0.477                   | 0.359                     |
| ACOT1       | chr14:73945188-74025651   | acyl-CoA thioesterase 1                                        | 0.375                   | 0.192                     |
| ACOT12      | chr5:80256507-81047072    | acyl-CoA thioesterase 12                                       | 0.144                   | 0.057                     |
| ACOT2       | chr14:74031643-74042509   | acyl-CoA thioesterase 2                                        | 0.453                   | 0.228                     |
| ACOT4       | chr14:74058409-74062470   | acyl-CoA thioesterase 4                                        | 0.638                   | 0.308                     |
| ACOT7       | chr1:6324331-6453826      | acyl-CoA thioesterase 7                                        | 1.984                   | 2.822                     |
| ACOX1       | chr17:73937588-74002080   | acyl-CoA oxidase 1, palmitoyl                                  | 0.52                    | 0.314                     |
| ACOX2       | chr3:58490862-58522929    | acyl-CoA oxidase 2, branched chain                             | 0.12                    | 0.051                     |
| ACOXL       | chr2:111490149-111926022  | acyl-CoA oxidase-like                                          | 1.283                   | 2.25                      |
| ACPP        | chr3:132036210-132087146  | acid phosphatase, prostate                                     | 0.229                   | 0.204                     |
| ACRBP       | chr12:6747241-6756668     | acrosin binding protein                                        | 1.757                   | 3.489                     |
| ACSF2       | chr17:48503518-48552200   | acyl-CoA synthetase family member 2                            | 0.335                   | 0.185                     |
| ACSL4       | chrX:108884563-108976787  | acyl-CoA synthetase long-chain family member 4                 | 0.311                   | 0.179                     |
| ACSL5       | chr10:114133804-114188138 | acyl-CoA synthetase long-chain family member 5                 | 0.194                   | 0.103                     |
| ACSM2A      | chr16:20462738-20498991   | acyl-CoA synthetase medium-chain family member 2A              | 0.199                   | 0.026                     |
| ACSM2B      | chr16:20529072-20593323   | acyl-CoA synthetase medium-chain family member 2B              | 0.209                   | 0.036                     |
| ACSM3       | chr16:20775311-20860990   | acyl-CoA synthetase medium-chain family member 3               | 0.255                   | 0.043                     |
| ACSM5       | chr16:20420855-20452618   | acyl-CoA synthetase medium-chain family member 5               | 0.267                   | 0.048                     |
| ACSS1       | chr20:24986865-25038818   | acyl-CoA synthetase short-chain family member 1                | 0.056                   | 0.013                     |
| ACSS2       | chr20:33460741-33515769   | acyl-CoA synthetase short-chain family member 2                | 0.55                    | 0.436                     |
| ACSS3       | chr12:81471626-81651243   | acyl-CoA synthetase short-chain family member 3                | 0.47                    | 0.255                     |
| ACTL8       | chr1:18081807-18153602    | actin like 8                                                   | 0.664                   | 0.41                      |
| ACTN1       | chr14:69312134-69446169   | actinin alpha 1                                                | 2.139                   | 2.208                     |
| ACTR3C      | chr7:149944300-150035245  | ARP3 actin-related protein 3 homolog C                         | 0.636                   | 0.256                     |
| ACY3        | chr11:67410025-67418190   | aminoacylase 3                                                 | 0.237                   | 0.032                     |
| ADA         | chr20:43248162-43280376   | adenosine deaminase                                            | 0.616                   | 0.428                     |
| ADAMTS10    | chr19:8645125-8675588     | ADAM metalloproteinase with thrombospondin type 1 motif 10     | 0.485                   | 0.218                     |
| ADAMTS20    | chr12:43747699-43945724   | ADAM metalloproteinase with thrombospondin type 1 motif 20     | 0.619                   | 0.344                     |
| ADAMTS9     | chr3:64501330-64997143    | ADAM metalloproteinase with thrombospondin type 1 motif 9      | 1.252                   | 2.23                      |
| ADAMTSL4    | chr1:150518468-150544704  | ADAMTS like 4                                                  | 2.146                   | 4.774                     |
| ADARB1      | chr21:46494492-46646478   | adenosine deaminase, RNA specific B1                           | 1.612                   | 2.865                     |
| ADAT3       | chr19:1905370-1926012     | adenosine deaminase, tRNA specific 3                           | 1.795                   | 2.75                      |
| ADC         | chr1:33546713-33586481    | antizyme inhibitor 2                                           | 1.578                   | 2.551                     |
| ADCK3       | chr1:227127180-227175246  | aarF domain containing kinase 3                                | 0.519                   | 0.217                     |
| ADCY7       | chr16:50279510-50402890   | adenylate cyclase 7                                            | 2.529                   | 3.574                     |
| ADH4        | chr4:100010007-100273917  | alcohol dehydrogenase 4 (class II), pi polypeptide             | 0.038                   | 0.008                     |
| ADH5        | chr4:99988727-100009947   | alcohol dehydrogenase 5 (class III), chi polypeptide           | 0.451                   | 0.326                     |
| ADH6        | chr4:100010007-100273917  | alcohol dehydrogenase 6 (class V)                              | 0.115                   | 0.007                     |
| ADM         | chr1:10326634-10328939    | adrenomedullin                                                 | 1.796                   | 2.328                     |
| ADORA2B     | chr17:15848230-15879210   | adenosine A2b receptor                                         | 1.738                   | 2.818                     |
| ADRA1A      | chr8:26605666-26729730    | adrenoceptor alpha 1A                                          | 0.209                   | 0.156                     |
| ADSSL1      | chr14:105190533-105213647 | adenylosuccinate synthase like 1                               | 0.407                   | 0.285                     |
| AFAP1       | chr4:7755816-7941653      | actin filament associated protein 1                            | 3.758                   | 8.601                     |
| AFAP1L1     | chr5:148651400-148721799  | actin filament associated protein 1 like 1                     | 2.787                   | 2.931                     |
| AFF4        | chr5:132202207-132299473  | AF4/FMR2 family member 4                                       | 1.531                   | 2.115                     |
| AFM         | chr4:74347405-74395600    | afamin                                                         | 0.177                   | 0.021                     |
| AFMD        | chr17:76170159-76203782   | arylformamidase                                                | 0.535                   | 0.278                     |
| AGBL2       | chr1:47681142-47737024    | ATP/GTP binding protein-like 2                                 | 0.614                   | 0.322                     |
| AGBL5       | chr2:27274490-27294567    | ATP/GTP binding protein-like 5                                 | 0.595                   | 0.49                      |
| AGL         | chr1:100315632-100389579  | amylase-like 1, 6-glucosidase, 4-alpha-glucanotransferase      | 0.498                   | 0.282                     |
| AGMAT       | chr1:15853351-15911605    | agmatinase                                                     | 0.303                   | 0.057                     |
| AGMO        | chr7:15198958-15601645    | alkylglycerol monoxygenase                                     | 0.304                   | 0.023                     |
| AGO2        | chr8:141530258-141645694  | argonaute 2, RISC catalytic component                          | 1.668                   | 2.373                     |
| AGPAT2      | chr9:139567594-139581911  | 1-acylglycerol-3-phosphate O-acyltransferase 2                 | 0.344                   | 0.379                     |
| AGPAT5      | chr8:6264112-6619021      | 1-acylglycerol-3-phosphate O-acyltransferase 5                 | 2.019                   | 4.034                     |
| AGPAT9      | chr4:84457066-84527027    | glycerol-3-phosphate acyltransferase 3                         | 2.671                   | 3.449                     |
| AGPHD1      | chr15:78799905-78829715   | hydroxylysine kinase                                           | 0.519                   | 0.406                     |
| AGT         | chr1:230838271-230850336  | angiotensinogen                                                | 0.725                   | 0.2                       |
| AGXT        | chr2:241797144-241818536  | alanine-glyoxylate aminotransferase                            | 0.186                   | 0.061                     |

|            |                           |                                                                              |       |       |
|------------|---------------------------|------------------------------------------------------------------------------|-------|-------|
| AGXT2      | chr5:34997071-35048240    | alanine--glyoxylate aminotransferase 2                                       | 0.12  | 0.015 |
| AGXT2L1    | chr4:109663018-109684235  | ethanolamine-phosphate phospho-lyase                                         | 0.435 | 0.133 |
| AHSG       | chr3:186330849-186339107  | alpha-2-HS-glycoprotein                                                      | 0.302 | 0.082 |
| AIFM1      | chrX:129263337-129299861  | apoptosis inducing factor, mitochondria associated 1                         | 0.616 | 0.432 |
| AIG1       | chr6:143381589-143665270  | androgen-induced 1                                                           | 0.636 | 0.454 |
| AK4        | chr1:65613231-65697828    | adenylate kinase 4                                                           | 0.537 | 0.384 |
| AKAP1      | chr17:55162474-55198710   | A-kinase anchoring protein 1                                                 | 0.52  | 0.434 |
| AKIRIN2    | chr6:88384577-88411985    | akirin 2                                                                     | 1.585 | 2.518 |
| AKNA       | chr9:117096083-117160753  | AT-hook transcription factor                                                 | 1.554 | 2.255 |
| AKR1B10    | chr7:134212253-134226166  | aldo-keto reductase family 1, member B10 (aldose reductase)                  | 0.406 | 0.033 |
| AKR1C2     | chr10:5005453-5326522     | aldo-keto reductase family 1, member C2                                      | 0.479 | 0.205 |
| AKR1C4     | chr10:5005453-5326522     | aldo-keto reductase family 1, member C4                                      | 0.177 | 0.018 |
| AKR1C6P    | chr10:4913858-4958540     | aldo-keto reductase family 1, member C6, pseudogene                          | 0.062 | 0.008 |
| AKR1D1     | chr7:137749922-137803050  | aldo-keto reductase family 1, member D1                                      | 0.092 | 0.023 |
| AKT3       | chr1:243419242-244006886  | v-akt murine thymoma viral oncogene homolog 3                                | 2.071 | 2.561 |
| ALAD       | chr9:116148591-116163618  | aminolevulinatase                                                            | 0.603 | 0.345 |
| ALB        | chr4:74269971-74287129    | albumin                                                                      | 0.527 | 0.099 |
| ALDH1A1    | chr9:75515577-75568233    | aldehyde dehydrogenase 1 family member A1                                    | 0.294 | 0.061 |
| ALDH1B1    | chr9:38385772-38398662    | aldehyde dehydrogenase 1 family member B1                                    | 0.605 | 0.403 |
| ALDH1L1    | chr3:125822307-125929011  | aldehyde dehydrogenase 1 family member L1                                    | 0.337 | 0.122 |
| ALDH3A1    | chr17:19641280-19651750   | aldehyde dehydrogenase 3 family member A1                                    | 0.173 | 0.048 |
| ALDH3A2    | chr17:19551554-19580917   | aldehyde dehydrogenase 3 family member A2                                    | 0.698 | 0.418 |
| ALDH4A1    | chr1:19197920-19229328    | aldehyde dehydrogenase 4 family member A1                                    | 0.598 | 0.289 |
| ALDH5A1    | chr6:24495018-24543479    | aldehyde dehydrogenase 5 family member A1                                    | 0.763 | 0.404 |
| ALDH6A1    | chr14:74399694-74551196   | aldehyde dehydrogenase 6 family member A1                                    | 0.476 | 0.218 |
| ALDH7A1    | chr5:125867007-125931283  | aldehyde dehydrogenase 7 family member A1                                    | 0.495 | 0.227 |
| ALDH9A1    | chr1:165631448-165667900  | aldehyde dehydrogenase 9 family member A1                                    | 0.713 | 0.434 |
| ALDOB      | chr9:104182697-104211853  | aldolase, fructose-bisphosphate B                                            | 0.209 | 0.047 |
| ALDOC      | chr17:26900131-26904105   | aldolase, fructose-bisphosphate C                                            | 0.418 | 0.343 |
| ALG14      | chr1:95392810-95538509    | ALG14, UDP-N-acetylglucosaminyltransferase subunit                           | 0.515 | 0.363 |
| ALG1L      | chr3:125635443-125656627  | ALG1, chitobiosylidiphosphodolichol beta-mannosyltransferase-like            | 0.333 | 0.272 |
| ALG8       | chr11:77726760-77850699   | ALG8, alpha-1,3-glycosyltransferase                                          | 0.641 | 0.428 |
| ALKBH2     | chr12:109525991-109531407 | alkB homolog 2, alpha-ketoglutarate-dependent dioxygenase                    | 0.496 | 0.35  |
| ALKBH8     | chr11:107373452-107436461 | alkB homolog 8, tRNA methyltransferase                                       | 0.531 | 0.218 |
| ALOXE3     | chr17:7999217-8022234     | arachidonate lipoxygenase 3                                                  | 13.02 | 24.91 |
| ALPK2      | chr8:56148481-56296189    | alpha kinase 2                                                               | 6.067 | 4.708 |
| ALPK3      | chr15:85291739-85416713   | alpha kinase 3                                                               | 1.612 | 2.142 |
| ALPL       | chr1:21835857-21904905    | alkaline phosphatase, liver/bone/kidney                                      | 0.078 | 0.022 |
| ALX3       | chr1:110574198-110613322  | ALX homeobox 3                                                               | 1.428 | 2.625 |
| AMBP       | chr9:116822404-116840752  | alpha-1-microglobulin/bikunin precursor                                      | 0.736 | 0.167 |
| AMD1       | chr6:111195986-111216913  | adenosylmethionine decarboxylase 1                                           | 1.867 | 3.414 |
| AMDHD1     | chr12:96337070-96362370   | amidohydrolase domain containing 1                                           | 0.766 | 0.341 |
| AMIGO3     | chr3:49726949-49761384    | adhesion molecule with Ig-like domain 3                                      | 1.345 | 2.166 |
| AMN        | chr14:103388992-103397352 | amniion associated transmembrane protein                                     | 0.673 | 0.143 |
| AMPD2      | chr1:110162434-110174677  | adenosine monophosphate deaminase 2                                          | 0.533 | 0.371 |
| AMPD3      | chr1:10471867-10529126    | adenosine monophosphate deaminase 3                                          | 1.337 | 3.016 |
| ANG        | chr14:211511120-21168758  | angiogenin, ribonuclease, RNase A family, 5                                  | 0.162 | 0.091 |
| ANGPT1     | chr8:108261709-108510254  | angiopoietin 1                                                               | 0.366 | 0.261 |
| ANGPTL3    | chr1:62920396-63154039    | angiopoietin like 3                                                          | 0.172 | 0.035 |
| ANGPTL4    | chr19:8429010-8439257     | angiopoietin like 4                                                          | 1.706 | 5.493 |
| ANK2       | chr4:113739132-114304896  | ankyrin 2, neuronal                                                          | 2.137 | 2.745 |
| ANK3       | chr10:61786055-62493284   | ankyrin 3, node of Ranvier (ankyrin G)                                       | 0.4   | 0.163 |
| ANKLE2     | chr12:133302137-133338451 | ankyrin repeat and LEM domain containing 2                                   | 1.509 | 2.049 |
| ANKRD1     | chr10:92631708-92699458   | ankyrin repeat domain 1                                                      | 4.91  | 3.6   |
| ANKRD11    | chr6:89333924-89557022    | ankyrin repeat domain 11                                                     | 1.896 | 3.198 |
| ANKRD29    | chr8:21178952-21242860    | ankyrin repeat domain 29                                                     | 0.833 | 0.403 |
| ANKRD30BP3 | chr10:45650109-45693809   | ankyrin repeat domain 30B pseudogene 3                                       | 0.766 | 0.426 |
| ANKRD33B   | chr5:10564434-10657928    | ankyrin repeat domain 33B                                                    | 1.844 | 2.186 |
| ANKRD36BP1 | chr1:168195222-168283664  | ankyrin repeat domain 36B pseudogene 1                                       | 0.742 | 0.472 |
| ANKRD44    | chr2:197851385-198175521  | ankyrin repeat domain 44                                                     | 0.685 | 0.37  |
| ANKRD50    | chr4:125584478-125633887  | ankyrin repeat domain 50                                                     | 1.706 | 2.341 |
| ANKRD54    | chr22:38225033-38245319   | ankyrin repeat domain 54                                                     | 1.49  | 2.099 |
| ANKS4B     | chr16:21245015-21263750   | ankyrin repeat and sterile alpha motif domain containing 4B                  | 0.211 | 0.199 |
| ANLN       | chr7:36363758-36493400    | anillin actin binding protein                                                | 0.583 | 0.35  |
| ANO3       | chr1:126353677-26684836   | anoctamin 3                                                                  | 0.72  | 0.428 |
| ANP32A     | chr15:69070874-69114510   | acidic nuclear phosphoprotein 32 family member A                             | 0.623 | 0.291 |
| ANPEP      | chr15:90328125-90358072   | alanyl aminopeptidase, membrane                                              | 0.41  | 0.237 |
| ANXA1      | chr9:75766780-75785307    | annexin A1                                                                   | 1.7   | 2.303 |
| ANXA10     | chr4:169013687-169246998  | annexin A10                                                                  | 0.116 | 0.008 |
| ANXA13     | chr8:124693033-124749647  | annexin A13                                                                  | 0.071 | 0.001 |
| ANXA3      | chr4:79472741-79531605    | annexin A3                                                                   | 3.774 | 2.494 |
| ANXA4      | chr2:69685126-70053596    | annexin A4                                                                   | 0.511 | 0.393 |
| ANXA5      | chr4:122589151-122618147  | annexin A5                                                                   | 1.888 | 2.858 |
| ANXA6      | chr5:150478488-150537443  | annexin A6                                                                   | 0.417 | 0.229 |
| ANXA8      | chr10:47096453-47174143   | annexin A8-like 1                                                            | 0.053 | 0.165 |
| ANXA8L2    | chr10:47746875-47769716   | annexin A8-like 1                                                            | 0.205 | 0.037 |
| ANXA9      | chr1:150954498-150980854  | annexin A9                                                                   | 0.372 | 0.111 |
| AOX1       | chr2:201450730-201537620  | aldehyde oxidase 1                                                           | 0.418 | 0.097 |
| AOX2P      | chr2:201556882-201658941  | aldehyde oxidase 2 pseudogene                                                | 0.311 | 0.165 |
| APIM2      | chr19:10683346-10697991   | adaptor related protein complex 1 mu 2 subunit                               | 0.296 | 0.057 |
| API1S1     | chr7:100797685-100804848  | adaptor related protein complex 1 sigma 1 subunit                            | 0.576 | 0.327 |
| API1S2     | chrX:15843928-15873171    | adaptor related protein complex 1 sigma 2 subunit                            | 2.676 | 3.755 |
| AP3M2      | chr8:42010463-42028881    | adaptor related protein complex 3 mu 2 subunit                               | 1.958 | 2.484 |
| AP5Z1      | chr7:4815189-4835759      | adaptor related protein complex 5 zeta 1 subunit                             | 1.289 | 2.035 |
| APBA1      | chr9:72042448-72287289    | amyloid beta precursor protein binding family A member 1                     | 1.93  | 2.138 |
| APBB1P     | chr10:26727149-26863674   | amyloid beta precursor protein binding family B member 1 interacting protein | 0.422 | 0.31  |
| APCDD1L    | chr20:57027922-57194948   | adenomatous polyposis coli down-regulated 1 like                             | 4.723 | 6.55  |
| APCS       | chr1:159557615-159558661  | amyloid P component, serum                                                   | 0.325 | 0.03  |
| APMAP      | chr20:24943579-24973425   | adipocyte plasma membrane associated protein                                 | 0.404 | 0.318 |
| APOA1      | chr1:116706464-116708338  | apolipoprotein A-I                                                           | 0.877 | 0.211 |
| APOA2      | chr1:161192082-161193418  | apolipoprotein A2                                                            | 0.487 | 0.041 |
| APOA4      | chr11:116691417-116694011 | apolipoprotein A4                                                            | 0.539 | 0.16  |
| APOB       | chr2:21224129-21269692    | apolipoprotein B                                                             | 0.459 | 0.075 |
| APOBEC3A   | chr22:39353526-39388784   | apolipoprotein B mRNA editing enzyme catalytic subunit 3A                    | 0.657 | 0.17  |
| APOBEC3C   | chr22:39410068-39416791   | apolipoprotein B mRNA editing enzyme catalytic subunit 3C                    | 0.439 | 0.279 |
| APOBEC3G   | chr22:39473009-39483748   | apolipoprotein B mRNA editing enzyme catalytic subunit 3G                    | 0.549 | 0.407 |
| APOBEC3H   | chr22:39493228-39500072   | apolipoprotein B mRNA editing enzyme catalytic subunit 3H                    | 0.133 | 0.089 |
| APOC1      | chr19:45417920-45422606   | apolipoprotein C1                                                            | 0.576 | 0.168 |
| APOC3      | chr1:116700623-116703787  | apolipoprotein C3                                                            | 0.564 | 0.15  |
| APOE       | chr19:45409038-45412650   | apolipoprotein E                                                             | 0.777 | 0.291 |
| APOH       | chr17:64208146-64225556   | apolipoprotein H                                                             | 0.681 | 0.148 |
| APOL1      | chr22:36649116-36663577   | apolipoprotein L1                                                            | 0.695 | 0.483 |
| AQP11      | chr11:77251026-77348851   | aquaporin 11                                                                 | 0.523 | 0.404 |

|           |                           |                                                                               |       |       |
|-----------|---------------------------|-------------------------------------------------------------------------------|-------|-------|
| AQP3      | chr9:33441151-33447631    | aquaporin 3 (Gill blood group)                                                | 0.793 | 0.216 |
| AQP7      | chr9:33384384-33402517    | aquaporin 7                                                                   | 0.498 | 0.096 |
| AQP7P3    | chr9:42811681-42893137    | aquaporin 7 pseudogene 3                                                      | 0.482 | 0.182 |
| AQP9      | chr15:58430407-58478110   | aquaporin 9                                                                   | 0.267 | 0.072 |
| ARAP2     | chr4:36059485-36246409    | ArfGAP with RhoGAP domain, ankyrin repeat and PH domain 2                     | 1.83  | 2.304 |
| ARG1      | chr6:131894343-131949379  | arginase 1                                                                    | 0.075 | 0.014 |
| ARG2      | chr14:68086576-68141602   | arginase 2                                                                    | 2.541 | 5.042 |
| ARHGAP11A | chr15:32907690-32931868   | Rho GTPase activating protein 11A                                             | 0.666 | 0.323 |
| ARHGAP19  | chr10:98757681-99052430   | Rho GTPase activating protein 19                                              | 0.603 | 0.421 |
| ARHGAP20  | chr1:1110447758-110583962 | Rho GTPase activating protein 20                                              | 1.863 | 2.115 |
| ARHGAP23  | chr17:36584719-36668858   | Rho GTPase activating protein 23                                              | 1.497 | 2.685 |
| ARHGAP26  | chr5:142149924-142608572  | Rho GTPase activating protein 26                                              | 2.606 | 4.106 |
| ARHGAP28  | chr18:6729685-6915717     | Rho GTPase activating protein 28                                              | 1.926 | 2.283 |
| ARHGAP32  | chr11:128834864-129149110 | Rho GTPase activating protein 32                                              | 1.735 | 2.81  |
| ARHGAP39  | chr8:145754516-145911218  | Rho GTPase activating protein 39                                              | 1.638 | 3.139 |
| ARHGAP8   | chr22:45064426-45258664   | Rho GTPase activating protein 8                                               | 0.533 | 0.446 |
| ARHGDI1A  | chr17:79825596-79829282   | Rho GDP dissociation inhibitor alpha                                          | 1.543 | 2.143 |
| ARHGFE10L | chr1:17866323-18024370    | Rho guanine nucleotide exchange factor 10 like                                | 0.548 | 0.415 |
| ARHGFE16  | chr1:3371146-3397677      | Rho guanine nucleotide exchange factor 16                                     | 0.264 | 0.055 |
| ARHGFE2   | chr1:155916540-155953675  | Rho/Rac guanine nucleotide exchange factor 2                                  | 8.114 | 10.63 |
| ARHGFE3   | chr9:35658286-35665278    | Rho guanine nucleotide exchange factor 39                                     | 0.506 | 0.28  |
| ARHGFE4   | chr2:131594476-131804836  | Rho guanine nucleotide exchange factor 4                                      | 2.243 | 5.065 |
| ARID3B    | chr15:74833547-74890472   | AT-rich interaction domain 3B                                                 | 1.639 | 2.645 |
| ARIH2     | chr3:48955220-49023842    | ariadne RBR E3 ubiquitin protein ligase 2                                     | 1.582 | 2.208 |
| ARL4C     | chr2:235401517-235405751  | ADP ribosylation factor like GTPase 4C                                        | 5.636 | 11.52 |
| ARL4D     | chr17:41476352-41485948   | ADP ribosylation factor like GTPase 4D                                        | 1.623 | 2.357 |
| ARL6IP5   | chr3:69134089-69155239    | ADP ribosylation factor like GTPase 6 interacting protein 5                   | 0.548 | 0.352 |
| ARL8A     | chr1:202102531-202113871  | ADP ribosylation factor like GTPase 8A                                        | 1.692 | 2.176 |
| ARPC1B    | chr7:98972297-99006305    | actin related protein 2/3 complex subunit 1B                                  | 1.83  | 2.72  |
| ARRB2     | chr17:4613788-4624795     | arrestin beta 2                                                               | 0.637 | 0.419 |
| ART4      | chr12:14939411-14996548   | ADP-ribosyltransferase 4 (Dombrock blood group)                               | 0.358 | 0.043 |
| ARVCF     | chr22:19863039-20004309   | armadillo repeat gene deleted in velocardiofacial syndrome                    | 2.915 | 4.028 |
| ASAP2     | chr2:9346893-9613239      | ArfGAP with SH3 domain, ankyrin repeat and PH domain 2                        | 2.855 | 4.796 |
| ASB13     | chr10:5680819-5708558     | ankyrin repeat and SOCS box containing 13                                     | 0.369 | 0.167 |
| ASB4      | chr7:95090878-95172810    | ankyrin repeat and SOCS box containing 4                                      | 0.567 | 0.286 |
| ASB8      | chr12:48541514-48551377   | ankyrin repeat and SOCS box containing 8                                      | 0.696 | 0.434 |
| ASGR1     | chr17:7076750-7082883     | asialoglycoprotein receptor 1                                                 | 0.194 | 0.044 |
| ASGR2     | chr17:7004640-7018620     | asialoglycoprotein receptor 2                                                 | 0.517 | 0.118 |
| ASIC5     | chr4:156750880-156841558  | acid sensing ion channel subunit family member 5                              | 0.637 | 0.327 |
| ASNS      | chr7:97481428-97501854    | asparagine synthetase (glutamine-hydrolyzing)                                 | 12.93 | 28.77 |
| ASPA      | chr17:3377403-3403781     | aspartoacylase                                                                | 0.128 | 0.069 |
| ASPHD2    | chr22:26825279-26840978   | aspartate beta-hydroxylase domain containing 2                                | 2.36  | 2.592 |
| ASPM      | chr1:197053256-197115824  | abnormal spindle microtubule assembly                                         | 0.453 | 0.217 |
| ASTN2     | chr9:119182459-120177317  | astroactin 2                                                                  | 0.628 | 0.34  |
| ATF3      | chr1:212738675-212794119  | activating transcription factor 3                                             | 11.82 | 14.48 |
| ATF4      | chr22:39916568-39918691   | activating transcription factor 4                                             | 2.392 | 3.773 |
| ATF6B     | chr6:32083044-32096017    | activating transcription factor 6 beta                                        | 0.649 | 0.448 |
| ATG4A     | chrX:107334898-107397901  | autophagy related 4A cysteine peptidase                                       | 0.752 | 0.494 |
| ATG4B     | chr2:242576799-242613274  | autophagy related 4B cysteine peptidase                                       | 1.484 | 2.28  |
| ATOH8     | chr2:85973169-86018506    | atonal bHLH transcription factor 8                                            | 0.615 | 0.415 |
| ATP10D    | chr4:47487245-47595551    | ATPase phospholipid transporting 10D (putative)                               | 1.545 | 2.546 |
| ATP11A    | chr13:113344374-113541482 | ATPase phospholipid transporting 11A                                          | 1.556 | 2.323 |
| ATP13A2   | chr1:17312452-17338423    | ATPase 13A2                                                                   | 2.735 | 4.994 |
| ATP13A3   | chr3:194123400-194234422  | ATPase 13A3                                                                   | 1.574 | 2.021 |
| ATP1A2    | chr1:160085519-160114339  | ATPase Na+/K+ transporting subunit alpha 2                                    | 0.357 | 0.274 |
| ATP1B3    | chr3:141595433-141645382  | ATPase Na+/K+ transporting subunit beta 3                                     | 1.992 | 2.905 |
| ATP2B1    | chr12:89952794-90105729   | ATPase plasma membrane Ca2+ transporting 1                                    | 1.167 | 2.207 |
| ATP2B4    | chr1:203595914-203713210  | ATPase plasma membrane Ca2+ transporting 4                                    | 1.74  | 2.309 |
| ATP5A1    | chr8:436664109-43684199   | ATP synthase, H+ transporting, mitochondrial F1 complex, alpha subunit 1, car | 0.542 | 0.347 |
| ATP5B     | chr12:57031958-57039852   | ATP synthase, H+ transporting, mitochondrial F1 complex, beta polypeptide     | 0.567 | 0.436 |
| ATP5C1    | chr10:7830092-7849762     | ATP synthase, H+ transporting, mitochondrial F1 complex, gamma polypeptide    | 0.596 | 0.42  |
| ATP5G1    | chr17:46970147-46973232   | ATP synthase, H+ transporting, mitochondrial Fo complex subunit C1 (subunit   | 0.58  | 0.47  |
| ATP5J     | chr21:27011593-27144771   | ATP synthase, H+ transporting, mitochondrial Fo complex subunit F6            | 0.452 | 0.28  |
| ATP5O     | chr21:35275756-35288158   | ATP synthase, H+ transporting, mitochondrial F1 complex, O subunit            | 0.541 | 0.362 |
| ATP6V0E2  | chr7:149564782-149577800  | ATPase H+ transporting V0 subunit e2                                          | 0.621 | 0.206 |
| ATP8B3    | chr19:1782030-1812275     | ATPase phospholipid transporting 8B3                                          | 0.42  | 0.291 |
| ATXN2L    | chr16:28829852-28848558   | ataxin 2 like                                                                 | 1.717 | 2.309 |
| ATXN7L1   | chr7:105244824-105517915  | ataxin 7 like 1                                                               | 0.474 | 0.315 |
| AUH       | chr9:93975140-94124226    | AU RNA binding protein/enoyl-CoA hydratase                                    | 0.487 | 0.273 |
| AURKA     | chr20:54944444-54967351   | aurora kinase A                                                               | 0.303 | 0.279 |
| AURKB     | chr17:8107825-8113944     | aurora kinase B                                                               | 0.619 | 0.33  |
| AXIN1     | chr16:337438-402676       | axin 1                                                                        | 2.106 | 3.622 |
| AZGP1P1   | chr7:99578384-99585452    | alpha-2-glycoprotein 1, zinc-binding pseudogene 1                             | 0.273 | 0.176 |
| B3GAT3    | chr11:62382766-62389647   | beta-1,3-glucuronyltransferase 3                                              | 1.826 | 2.67  |
| B3GNT3    | chr19:17905624-17924417   | UDP-GlcNAc:betaGal beta-1,3-N-acetylglucosaminyltransferase 3                 | 0.225 | 0.033 |
| B4GALT2   | chr1:44444873-44456854    | beta-1,4-galactosyltransferase 2                                              | 1.918 | 2.149 |
| BAA1      | chr9:104117616-104147287  | bile acid-CoA:amino acid N-acyltransferase                                    | 0.071 | 0.009 |
| BACH2     | chr6:90636246-91006627    | BTB domain and CNC homolog 2                                                  | 2.674 | 3.984 |
| BAI2      | chr1:32192549-32229675    | adhesion G protein-coupled receptor B2                                        | 3.166 | 3.846 |
| BAIAP2L2  | chr22:38473903-38506676   | BAI1 associated protein 2 like 2                                              | 0.643 | 0.469 |
| BATF2     | chr1:164755416-164764517  | basic leucine zipper ATF-like transcription factor 2                          | 0.327 | 0.275 |
| BATF3     | chr12:12859758-1212873327 | basic leucine zipper ATF-like transcription factor 3                          | 2.835 | 5.484 |
| BBOX1     | chr11:27062508-27149354   | gamma-butyrobetaine hydroxylase 1                                             | 0.238 | 0.033 |
| BCAR3     | chr1:94027262-94312706    | breast cancer anti-estrogen resistance 3                                      | 1.516 | 2.75  |
| BCAS4     | chr20:49411466-49494544   | breast carcinoma amplified sequence 4                                         | 2.292 | 2.543 |
| BCH1      | chr3:165490691-165555253  | butyrylcholinesterase                                                         | 0.529 | 0.229 |
| BCKDHA    | chr19:41903693-41903910   | branched chain keto acid dehydrogenase E1, alpha polypeptide                  | 0.443 | 0.315 |
| BCKDHB    | chr6:80816343-81180432    | branched chain keto acid dehydrogenase E1, beta polypeptide                   | 0.608 | 0.43  |
| BCL2      | chr18:60790578-60986979   | B-cell CLL/lymphoma 2                                                         | 2.208 | 3.922 |
| BCL3      | chr19:45243486-45263301   | B-cell CLL/lymphoma 3                                                         | 0.618 | 0.354 |
| BCORL1    | chrX:129115649-129192172  | BCL6 corepressor-like 1                                                       | 1.495 | 2.199 |
| BDH1      | chr3:197236653-197300194  | 3-hydroxybutyrate dehydrogenase, type 1                                       | 0.035 | 0.024 |
| BDH2      | chr4:103998781-104021024  | 3-hydroxybutyrate dehydrogenase, type 2                                       | 0.448 | 0.289 |
| BDKRB2    | chr14:96671070-96710792   | bradykinin receptor B2                                                        | 4.605 | 2.436 |
| BEND7     | chr10:13480483-13570589   | BEN domain containing 7                                                       | 2.248 | 3.145 |
| BEX5      | chrX:101408678-101410986  | brain expressed X-linked 5                                                    | 1.921 | 3.499 |
| BGLAP     | chr1:156182778-156262234  | bone gamma-carboxyglutamate protein                                           | 0.692 | 0.446 |
| BHLHE40   | chr3:5021096-5026865      | basic helix-loop-helix family member e40                                      | 1.358 | 2.169 |
| BHLHE41   | chr12:26272958-26278631   | basic helix-loop-helix family member e41                                      | 2.712 | 3.856 |
| BHMT2     | chr5:78292796-78531831    | betaine-homocysteine S-methyltransferase 2                                    | 0.49  | 0.135 |
| BIK       | chr22:43506753-43525718   | BCL2 interacting killer                                                       | 2.811 | 3.495 |
| BIN1      | chr2:127805598-127864903  | bridging integrator 1                                                         | 1.747 | 2.019 |
| BIRC5     | chr17:76210276-76221716   | baculoviral IAP repeat containing 5                                           | 0.469 | 0.188 |



|           |                           |                                                             |       |       |
|-----------|---------------------------|-------------------------------------------------------------|-------|-------|
| BIVM      | chr13:103436630-103528351 | basic, immunoglobulin-like variable motif containing        | 0.69  | 0.461 |
| BLNK      | chr10:97889150-98031357   | B-cell linker                                               | 0.15  | 0.022 |
| BNIP1     | chr5:172571444-172591390  | BCL2/adenovirus E1B 19kDa interacting protein 1             | 0.636 | 0.369 |
| BPHL      | chr6:3118891-3153804      | biphenyl hydrolase-like (serine hydrolase)                  | 0.5   | 0.337 |
| BPNT1     | chr1:220046618-220321383  | 3'(2'), 5'-bisphosphate nucleotidase 1                      | 0.591 | 0.323 |
| BRE       | chr2:28004265-28561767    | brain and reproductive organ-expressed (TNFRSF1A modulator) | 0.697 | 0.386 |
| BR3       | chr7:97881690-98030427    | brain protein I3                                            | 1.276 | 2.243 |
| BRSK2     | chr1:1411128-1483919      | BR serine/threonine kinase 2                                | 2.111 | 4.136 |
| BRWD3     | chrX:79924890-80065283    | bromodomains and WD repeat domain containing 3              | 0.733 | 0.391 |
| BSN       | chr3:49591921-49710156    | bassoon presynaptic cytomatrix protein                      | 1.884 | 2.796 |
| BTBD19    | chr1:45266035-45452394    | BTB domain containing 19                                    | 1.815 | 2.694 |
| BDT       | chr3:15643217-15696804    | biotinidase                                                 | 0.506 | 0.331 |
| BTN3A2    | chr6:26365397-26378548    | butyrophilin subfamily 3 member A2                          | 0.606 | 0.488 |
| BTNL8     | chr5:180326076-180378350  | butyrophilin like 8                                         | 0.255 | 0.022 |
| BUB1      | chr2:111395407-111435687  | BUB1 mitotic checkpoint serine/threonine kinase             | 0.607 | 0.397 |
| BUB1B     | chr5:40453209-40569688    | BUB1 mitotic checkpoint serine/threonine kinase B           | 0.462 | 0.201 |
| BUD31     | chr7:99006600-99063824    | BUD31 homolog                                               | 1.508 | 2.288 |
| C10orf11  | chr10:77542518-78317126   | chromosome 10 open reading frame 11                         | 0.451 | 0.252 |
| C10orf54  | chr10:73156690-73575704   | chromosome 10 open reading frame 54                         | 1.427 | 2.045 |
| C11orf1   | chr1:111744779-111754886  | chromosome 11 open reading frame 1                          | 0.654 | 0.44  |
| C11orf35  | chr1:1532198-564025       | lamin tail domain containing 2                              | 0.59  | 0.374 |
| C11orf54  | chr11:93474789-93500422   | chromosome 11 open reading frame 54                         | 0.397 | 0.191 |
| C12orf39  | chr12:21679209-21685781   | spexin hormone                                              | 2.121 | 3.46  |
| C12orf44  | chr12:52463694-52471279   | autophagy related 101                                       | 1.543 | 2.091 |
| C12orf75  | chr12:105724413-105765296 | chromosome 12 open reading frame 75                         | 0.733 | 0.21  |
| C14orf1   | chr14:76117232-76127538   | chromosome 14 open reading frame 1                          | 0.316 | 0.152 |
| C14orf105 | chr14:57936054-57960609   | chromosome 14 open reading frame 105                        | 0.535 | 0.052 |
| C14orf159 | chr14:91580356-91691890   | chromosome 14 open reading frame 159                        | 0.366 | 0.214 |
| C14orf93  | chr14:23451961-23479360   | chromosome 14 open reading frame 93                         | 0.715 | 0.424 |
| C15orf39  | chr15:75494220-75504689   | chromosome 15 open reading frame 39                         | 1.783 | 2.683 |
| C15orf52  | chr15:40623624-40633168   | chromosome 15 open reading frame 52                         | 0.651 | 0.356 |
| C15orf62  | chr15:411060066-41106768  | chromosome 15 open reading frame 62                         | 0.472 | 0.324 |
| C16orf62  | chr16:19566665-19869950   | chromosome 16 open reading frame 62                         | 0.625 | 0.396 |
| C16orf72  | chr16:9185536-9213555     | chromosome 16 open reading frame 72                         | 1.871 | 2.598 |
| C16orf93  | chr16:30709024-30787628   | coiled-coil domain containing 189                           | 1.261 | 2.987 |
| C17orf51  | chr17:21430635-21476594   | chromosome 17 open reading frame 51                         | 1.721 | 2.153 |
| C17orf53  | chr17:42219273-42239944   | chromosome 17 open reading frame 53                         | 0.664 | 0.235 |
| C17orf67  | chr17:54869273-54911256   | chromosome 17 open reading frame 67                         | 2.05  | 2.491 |
| C17orf75  | chr17:30651762-30677062   | chromosome 17 open reading frame 75                         | 0.524 | 0.297 |
| C19orf12  | chr19:30189792-30206696   | chromosome 19 open reading frame 12                         | 0.466 | 0.267 |
| C19orf60  | chr19:18699430-18703224   | chromosome 19 open reading frame 60                         | 0.505 | 0.292 |
| C19orf66  | chr19:10196805-10213425   | chromosome 19 open reading frame 66                         | 0.576 | 0.388 |
| C1orf111  | chr1:162039483-162356896  | chromosome 1 open reading frame 111                         | 0.484 | 0.364 |
| C1orf115  | chr1:220863627-220872499  | chromosome 1 open reading frame 115                         | 0.479 | 0.229 |
| C1orf131  | chr1:231359508-231424376  | chromosome 1 open reading frame 131                         | 0.629 | 0.426 |
| C1orf159  | chr1:1015890-1051736      | chromosome 1 open reading frame 159                         | 2.951 | 6.048 |
| C1orf220  | chr1:178511426-178518731  | chromosome 1 open reading frame 220                         | 0.473 | 0.285 |
| C1orf85   | chr1:156262477-156265480  | glycosylated lysosomal membrane protein                     | 0.62  | 0.412 |
| C1QL1     | chr17:43037060-43045644   | complement component 1, q subcomponent-like 1               | 1.641 | 2.879 |
| C1RL      | chr12:7247145-7311530     | complement C1r subcomponent like                            | 0.525 | 0.241 |
| C2        | chr6:31865561-31913449    | complement component 2                                      | 0.778 | 0.349 |
| C21orf33  | chr21:45553462-45565605   | chromosome 21 open reading frame 33                         | 0.599 | 0.484 |
| C21orf58  | chr21:47720485-47865818   | chromosome 21 open reading frame 58                         | 0.618 | 0.44  |
| C22orf23  | chr22:38302070-38365319   | chromosome 22 open reading frame 23                         | 2.912 | 6.356 |
| C2CD5     | chr12:22601517-22697452   | C2 calcium-dependent domain containing 5                    | 0.764 | 0.48  |
| C2orf47   | chr2:200793633-200828847  | chromosome 2 open reading frame 47                          | 0.597 | 0.319 |
| C2orf54   | chr2:241825388-241836249  | chromosome 2 open reading frame 54                          | 0.009 | 0.001 |
| C2orf72   | chr2:231902268-231917323  | chromosome 2 open reading frame 72                          | 0.609 | 0.363 |
| C2orf74   | chr2:61372214-61392095    | chromosome 2 open reading frame 74                          | 0.658 | 0.437 |
| C2orf88   | chr2:191002485-191068210  | chromosome 2 open reading frame 88                          | 0.414 | 0.335 |
| C4A       | chr6:31949833-31970458    | complement component 4B (Chido blood group)                 | 0.708 | 0.413 |
| C4BPA     | chr1:207277574-207318317  | complement component 4 binding protein alpha                | 0.759 | 0.148 |
| C4BPB     | chr1:207262211-207273337  | complement component 4 binding protein beta                 | 0.195 | 0.043 |
| C4orf19   | chr4:37455551-37687999    | chromosome 4 open reading frame 19                          | 0.872 | 0.449 |
| C4orf32   | chr4:113066552-113110267  | chromosome 4 open reading frame 32                          | 2.013 | 3.02  |
| C4orf33   | chr4:130014828-130033843  | chromosome 4 open reading frame 33                          | 0.513 | 0.226 |
| C5        | chr9:123714595-123836475  | complement component 5                                      | 0.435 | 0.136 |
| C5orf27   | chr5:95187459-95195836    | long intergenic non-protein coding RNA 1554                 | 0.32  | 0.369 |
| C5orf4    | chr5:154197942-154256352  | fatty acid hydroxylase domain containing 2                  | 0.262 | 0.076 |
| C5orf45   | chr5:179224597-179285840  | chromosome 5 open reading frame 45                          | 2.393 | 3.074 |
| C6        | chr5:41142247-41261540    | complement component 6                                      | 0.243 | 0.045 |
| C6orf1    | chr6:34214156-34216904    | chromosome 6 open reading frame 1                           | 3.172 | 7.17  |
| C6orf141  | chr6:49518112-49525753    | chromosome 6 open reading frame 141                         | 2.358 | 3.119 |
| C6orf48   | chr6:31802692-31807543    | chromosome 6 open reading frame 48                          | 3.239 | 5.908 |
| C7orf10   | chr7:40174574-40900366    | succinyl-CoA:glutarate-CoA transferase                      | 0.538 | 0.322 |
| C8A       | chr1:57320442-57383894    | complement component 8 alpha subunit                        | 0.338 | 0.07  |
| C8B       | chr1:57394882-57431717    | complement component 8, beta polypeptide                    | 0.514 | 0.187 |
| C8G       | chr9:139839380-139841613  | complement component 8, gamma polypeptide                   | 0.621 | 0.393 |
| C8orf4    | chr8:40010986-40012827    | chromosome 8 open reading frame 4                           | 0.783 | 0.403 |
| C8orf47   | chr8:99059794-99106890    | glutamate rich 5                                            | 0.555 | 0.201 |
| C9orf16   | chr9:130922538-130926207  | chromosome 9 open reading frame 16                          | 1.976 | 3.046 |
| C9orf3    | chr9:97488950-97849500    | chromosome 9 open reading frame 3                           | 0.783 | 0.326 |
| C9orf69   | chr9:139006426-139016612  | chromosome 9 open reading frame 69                          | 2.14  | 2.02  |
| C9orf91   | chr9:117366345-117408703  | chromosome 9 open reading frame 91                          | 3.379 | 6.816 |
| CA9       | chr9:35673914-35681154    | carbonic anhydrase 9                                        | 0.038 | 0.065 |
| CABP1     | chr12:121078421-121105127 | calcium binding protein 1                                   | 3.496 | 7.811 |
| CACNB2    | chr10:18429605-18948181   | calcium voltage-gated channel auxiliary subunit beta 2      | 0.488 | 0.382 |
| CADM1     | chr1:115044344-115375241  | cell adhesion molecule 1                                    | 1.695 | 2.34  |
| CALCR1    | chr2:188206689-188313027  | calcitonin receptor like receptor                           | 0.495 | 0.443 |
| CALN1     | chr7:71244475-71877365    | calneuron 1                                                 | 1.736 | 3.239 |
| CAMSAP1   | chr9:138700332-138799268  | calmodulin regulated spectrin associated protein 1          | 1.586 | 2.359 |
| CAP2      | chr6:17939625-17558023    | CAP, adenylate cyclase-associated protein, 2 (yeast)        | 0.624 | 0.411 |
| CAPN1     | chr11:64948542-64979477   | calpain 1                                                   | 0.383 | 0.162 |
| CARD16    | chr11:104896133-104972158 | caspase recruitment domain family member 16                 | 0.424 | 0.182 |
| CARD6     | chr5:40841409-40855456    | caspase recruitment domain family member 6                  | 0.419 | 0.199 |
| CARD8     | chr9:48707321-48761450    | caspase recruitment domain family member 8                  | 0.464 | 0.358 |
| CARD9     | chr9:139256351-139294862  | caspase recruitment domain family member 9                  | 3.269 | 4.028 |
| CASKIN2   | chr17:73452663-73511627   | CASK interacting protein 2                                  | 0.747 | 0.357 |
| CASP1     | chr1:104896133-104972158  | caspase 1                                                   | 0.405 | 0.234 |
| CASP10    | chr2:202047620-202094222  | caspase 10                                                  | 0.592 | 0.35  |
| CASP14    | chr19:15160212-15169109   | caspase 14                                                  | 0.081 | 0.024 |
| CASP4     | chr11:104813593-104839325 | caspase 4                                                   | 0.585 | 0.325 |
| CASP8     | chr2:202098165-202316319  | caspase 8                                                   | 0.676 | 0.472 |

|          |                           |                                                            |       |       |
|----------|---------------------------|------------------------------------------------------------|-------|-------|
| CASZ1    | chr1:10696665-10856733    | castor zinc finger 1                                       | 1.334 | 2.132 |
| CAT      | chr11:34460463-34493607   | catalase                                                   | 0.497 | 0.288 |
| CATSPERG | chr19:38826442-38861589   | cation channel sperm associated auxiliary subunit gamma    | 2.728 | 7.469 |
| CAV1     | chr7:116164838-116201239  | caveolin 1                                                 | 0.437 | 0.258 |
| CBFA2T2  | chr20:32077927-32238326   | CBFA2/RUNX1 translocation partner 2                        | 1.581 | 2.289 |
| CBFB     | chr16:67062827-67134960   | core-binding factor, beta subunit                          | 2.009 | 3.05  |
| CBL      | chr11:119076985-119178859 | Cbl proto-oncogene                                         | 1.6   | 2.415 |
| CBLN3    | chr14:24894567-24898931   | cerebellin 3 precursor                                     | 0.32  | 0.259 |
| CBR1     | chr21:37441939-37498938   | carbonyl reductase 1                                       | 0.731 | 0.445 |
| CBR4     | chr4:169908741-169931468  | carbonyl reductase 4                                       | 0.556 | 0.318 |
| CBX2     | chr17:77751973-77762148   | chromobox 2                                                | 1.742 | 2.067 |
| CBX4     | chr17:77806954-77813213   | chromobox 4                                                | 2.865 | 5.201 |
| CCBP2    | chr3:42850963-42910229    | atypical chemokine receptor 2                              | 0.304 | 0.16  |
| CCDC120  | chrX:48910960-48927510    | coiled-coil domain containing 120                          | 0.539 | 0.307 |
| CCDC125  | chr5:68575686-68628568    | coiled-coil domain containing 125                          | 0.579 | 0.299 |
| CCDC136  | chr7:128431463-128462187  | coiled-coil domain containing 136                          | 3.605 | 5.87  |
| CCDC150  | chr2:197504355-197627123  | coiled-coil domain containing 150                          | 0.815 | 0.448 |
| CCDC152  | chr5:42756919-42812024    | coiled-coil domain containing 152                          | 0.413 | 0.242 |
| CCDC163P | chr1:45959597-45965751    | coiled-coil domain containing 163, pseudogene              | 1.413 | 2.856 |
| CCDC170  | chr6:151815174-151942328  | coiled-coil domain containing 170                          | 0.189 | 0.036 |
| CCDC34   | chr1:127359649-27384795   | coiled-coil domain containing 34                           | 0.578 | 0.181 |
| CCDC51   | chr3:48473579-48481529    | coiled-coil domain containing 51                           | 0.657 | 0.35  |
| CCDC53   | chr12:102406658-102455909 | coiled-coil domain containing 53                           | 0.663 | 0.4   |
| CCDC58   | chr3:122078435-122102074  | coiled-coil domain containing 58                           | 0.522 | 0.326 |
| CCDC68   | chr18:52568506-52626739   | coiled-coil domain containing 68                           | 0.697 | 0.302 |
| CCDC85B  | chr1:165657289-65667997   | coiled-coil domain containing 85B                          | 4.946 | 12.03 |
| CCDC92   | chr12:124247041-124800570 | coiled-coil domain containing 92                           | 2.076 | 3.485 |
| CCL14    | chr17:34310691-34329170   | C-C motif chemokine ligand 14                              | 0.199 | 0.048 |
| CCL15    | chr17:34310691-34329170   | C-C motif chemokine ligand 15                              | 0.199 | 0.048 |
| CCL2     | chr17:32582295-32584220   | C-C motif chemokine ligand 2                               | 0.285 | 0.086 |
| CCL20    | chr2:228678557-228682280  | C-C motif chemokine ligand 20                              | 4.346 | 2.177 |
| CCL5     | chr17:34198283-34207377   | C-C motif chemokine ligand 5                               | 0.957 | 2.78  |
| CCND1    | chr11:69455805-69490165   | cyclin D1                                                  | 2.486 | 2.653 |
| CCND2    | chr12:4382901-4414522     | cyclin D2                                                  | 2.087 | 2.432 |
| CCNI     | chr4:77968228-77997989    | cyclin I                                                   | 1.667 | 2.486 |
| CCNJL    | chr5:159678561-159739573  | cyclin J like                                              | 2.646 | 4.052 |
| CCNYL1   | chr2:208576194-208621429  | cyclin Y like 1                                            | 1.797 | 2.647 |
| CCRN4L   | chr4:139936941-140098270  | nocturnin                                                  | 1.98  | 2.059 |
| CCSAP    | chr1:229456751-229478688  | centriole, cilia and spindle associated protein            | 1.956 | 2.548 |
| CCSER2   | chr10:86088334-86278276   | coiled-coil serine rich protein 2                          | 1.676 | 2.456 |
| CD1D     | chr1:158147809-158156216  | CD1d molecule                                              | 0.337 | 0.119 |
| CD200    | chr3:112051408-112081658  | CD200 molecule                                             | 5.178 | 10.75 |
| CD247    | chr1:167399876-167487847  | CD247 molecule                                             | 2.18  | 5.891 |
| CD274    | chr9:5450502-5470567      | CD274 molecule                                             | 2.507 | 4.2   |
| CD302    | chr2:160569009-160761267  | CD302 molecule                                             | 0.665 | 0.384 |
| CD44     | chr1:35160416-35253949    | CD44 molecule (Indian blood group)                         | 4.325 | 6.299 |
| CD70     | chr19:6582520-6591224     | CD70 molecule                                              | 1.735 | 2.859 |
| CD74     | chr5:149781199-149792499  | CD74 molecule                                              | 0.485 | 0.374 |
| CDC14B   | chr9:99262092-99382112    | cell division cycle 14B                                    | 0.678 | 0.414 |
| CDC20B   | chr5:54408622-54469005    | cell division cycle 20B                                    | 0.126 | 0.104 |
| CDC25C   | chr5:137620958-137667516  | cell division cycle 25C                                    | 0.489 | 0.345 |
| CDC42EP1 | chr22:37956470-37965432   | CDC42 effector protein 1                                   | 1.737 | 2.095 |
| CDCA3    | chr12:6957971-6960456     | cell division cycle associated 3                           | 0.349 | 0.279 |
| CDCP1    | chr3:45123768-45187914    | CUB domain containing protein 1                            | 2.656 | 4.327 |
| CDH1     | chr16:68771194-68869444   | cadherin 1                                                 | 0.252 | 0.054 |
| CDH10    | chr5:24487208-24645085    | cadherin 10                                                | 0.389 | 0.295 |
| CDK1     | chr10:62538088-62554778   | cyclin-dependent kinase 1                                  | 0.747 | 0.379 |
| CDK18    | chr1:205473683-205502163  | cyclin-dependent kinase 18                                 | 0.705 | 0.346 |
| CDK5     | chr7:150750898-150755052  | cyclin-dependent kinase 5                                  | 0.59  | 0.332 |
| CDK5RAP2 | chr9:123151146-123342448  | CDK5 regulatory subunit associated protein 2               | 0.699 | 0.449 |
| CDKN1A   | chr6:36644236-36655116    | cyclin-dependent kinase inhibitor 1A                       | 1.437 | 2.197 |
| CDKN2B   | chr9:21967137-22121093    | cyclin-dependent kinase inhibitor 2B                       | 1.578 | 2.791 |
| CDKN2C   | chr1:51434366-51440309    | cyclin-dependent kinase inhibitor 2C                       | 0.388 | 0.278 |
| CDKN2D   | chr19:10677137-10679655   | cyclin-dependent kinase inhibitor 2D                       | 1.523 | 2.832 |
| CDNF     | chr10:14860272-14880017   | cerebral dopamine neurotrophic factor                      | 0.666 | 0.364 |
| CDR2L    | chr7:72983726-73001892    | cerebellar degeneration related protein 2 like             | 3.427 | 5.65  |
| CDRT4    | chr17:15339235-15466945   | CMT1A duplicated region transcript 4                       | 1.616 | 2.141 |
| CDYL     | chr6:4706392-4955778      | chromodomain protein, Y-like                               | 2.118 | 3.341 |
| CEACAM1  | chr19:42901299-43156507   | carcinoembryonic antigen related cell adhesion molecule 1  | 0.528 | 0.075 |
| CEBPG    | chr19:36846574-33873592   | CCAAT/enhancer binding protein gamma                       | 2.437 | 3.085 |
| CENPF    | chr1:214776531-214837914  | centromere protein F                                       | 0.288 | 0.293 |
| CENPI    | chrX:100353200-100418635  | centromere protein I                                       | 0.658 | 0.165 |
| CENPO    | chr2:25013135-25142693    | centromere protein O                                       | 0.864 | 0.356 |
| CEP164   | chr11:117192312-117283982 | centrosomal protein 164                                    | 1.628 | 2.135 |
| CEP170B  | chr14:105331640-105363108 | centrosomal protein 170B                                   | 1.784 | 2.92  |
| CEP19    | chr3:196433147-196559518  | centrosomal protein 19                                     | 1.757 | 2.048 |
| CERS5    | chr12:50523383-50561158   | ceramide synthase 5                                        | 1.535 | 2.189 |
| CES2     | chr16:66968346-66978994   | carboxylesterase 2                                         | 0.519 | 0.309 |
| CES5A    | chr16:55880065-55989943   | carboxylesterase 5A                                        | 0.582 | 0.082 |
| CETN4P   | chr4:123621577-123670522  | centrin 4, pseudogene                                      | 3.619 | 5.905 |
| CFB      | chr6:31913720-31919861    | complement factor B                                        | 0.746 | 0.471 |
| CFHR2    | chr1:196912933-196928356  | complement factor H related 2                              | 0.13  | 0.027 |
| CFHR5    | chr1:196946666-196978803  | complement factor H related 5                              | 0.565 | 0.121 |
| CFI      | chr4:110661847-110723335  | complement factor I                                        | 0.548 | 0.162 |
| CGB7     | chr19:49557530-49562927   | chorionic gonadotropin beta subunit 7                      | 2.81  | 3.639 |
| CGNL1    | chr5:57668702-57844419    | cingulin-like 1                                            | 0.575 | 0.483 |
| CGREF1   | chr2:27309610-27341995    | cell growth regulator with EF-hand domain 1                | 0.303 | 0.121 |
| CHAC1    | chr15:41245545-41254871   | ChaC glutathione-specific gamma-glutamylcyclotransferase 1 | 17.53 | 35.5  |
| CHCHD1   | chr10:75541807-75543406   | coiled-coil-helix-coiled-coil-helix domain containing 1    | 0.59  | 0.429 |
| CHD3     | chr17:7759620-7816075     | chromodomain helicase DNA binding protein 3                | 0.465 | 0.299 |
| CHN2     | chr7:29234120-29553944    | chimerin 2                                                 | 0.374 | 0.158 |
| CHPF     | chr2:220403635-220408487  | chondroitin polymerizing factor                            | 1.782 | 3.382 |
| CHRD     | chr3:184097773-184107617  | chordin                                                    | 0.508 | 0.178 |
| CHRD2L   | chr11:74407473-74442186   | chordin-like 2                                             | 0.822 | 0.254 |
| CHRNA5   | chr15:78857861-78913637   | cholinergic receptor nicotinic alpha 5 subunit             | 3.009 | 3.867 |
| CHRNA7   | chr15:32322685-32463562   | cholinergic receptor nicotinic alpha 7 subunit             | 2.582 | 3.077 |
| CHST1    | chr1:45669238-45687593    | carbohydrate sulfotransferase 1                            | 1.763 | 3.036 |
| CHST11   | chr12:104849340-105155792 | carbohydrate (chondroitin 4) sulfotransferase 11           | 2.753 | 6.68  |
| CHST13   | chr3:126242946-126262134  | carbohydrate (chondroitin 4) sulfotransferase 13           | 0.402 | 0.106 |
| CHST3    | chr10:73724119-73773322   | carbohydrate (chondroitin 6) sulfotransferase 3            | 2.753 | 6.473 |
| CHST4    | chr16:71481500-71645739   | carbohydrate sulfotransferase 4                            | 0.382 | 0.062 |
| CHST8    | chr19:34112860-34264414   | carbohydrate sulfotransferase 8                            | 3.956 | 10.42 |
| CHSY1    | chr15:101715927-101792181 | chondroitin sulfate synthase 1                             | 1.959 | 2.437 |

|                   |                           |                                                                                  |       |       |
|-------------------|---------------------------|----------------------------------------------------------------------------------|-------|-------|
| <i>CHSY3</i>      | chr5:129240233-129522351  | chondroitin sulfate synthase 3                                                   | 1.248 | 2.372 |
| <i>CIDEB</i>      | chr14:24759803-24787242   | cell death-inducing DFFA-like effector b                                         | 0.523 | 0.453 |
| <i>CIDEC</i>      | chr3:9906149-10149915     | cell death-inducing DFFA-like effector c                                         | 0.235 | 0.035 |
| <i>CIDCEP</i>     | chr3:9906149-10149915     | cell death-inducing DFFA-like effector c pseudogene                              | 1.541 | 2.522 |
| <i>CIRBP</i>      | chr19:1267469-1279246     | cold inducible RNA binding protein                                               | 1.62  | 2.097 |
| <i>CISD3</i>      | chr17:36861831-36906081   | CDGSH iron sulfur domain 3                                                       | 0.652 | 0.47  |
| <i>CIT</i>        | chr12:120123594-120315116 | citron rho-interacting serine/threonine kinase                                   | 0.467 | 0.243 |
| <i>CIZ1</i>       | chr9:130928343-131017527  | CDKN1A interacting zinc finger protein 1                                         | 1.318 | 2.014 |
| <i>CKAP2L</i>     | chr2:113493941-113522254  | cytoskeleton associated protein 2 like                                           | 0.668 | 0.26  |
| <i>CLDN1</i>      | chr3:190023489-190040235  | claudin 1                                                                        | 1.791 | 2.07  |
| <i>CLDN14</i>     | chr2:137832919-37948867   | claudin 14                                                                       | 0.026 | 0.05  |
| <i>CLDN16</i>     | chr3:190040351-190129978  | claudin 16                                                                       | 0.452 | 0.261 |
| <i>CLDN3</i>      | chr7:73183326-73184600    | claudin 3                                                                        | 0.442 | 0.135 |
| <i>CLDN7</i>      | chr17:7146905-7166512     | claudin 7                                                                        | 0.471 | 0.2   |
| <i>CLDN9</i>      | chr16:3054821-3064506     | claudin 9                                                                        | 2.273 | 3.018 |
| <i>CLDND2</i>     | chr19:51870291-51872377   | claudin domain containing 2                                                      | 0.544 | 0.36  |
| <i>CLEC2B</i>     | chr12:10004967-10022458   | C-type lectin domain family 2 member B                                           | 0.338 | 0.158 |
| <i>CLGN</i>       | chr4:141309606-141348815  | calmeglin                                                                        | 2.601 | 2.605 |
| <i>CLIC4</i>      | chr1:25071759-25170815    | chloride intracellular channel 4                                                 | 1.859 | 3.217 |
| <i>CLIP1</i>      | chr12:122755979-122907497 | CAP-Gly domain containing linker protein 1                                       | 1.572 | 2.1   |
| <i>CLIP2</i>      | chr7:73703800-73820273    | CAP-Gly domain containing linker protein 2                                       | 1.723 | 2.466 |
| <i>CLMN</i>       | chr14:95648275-95786245   | calmin (calponin-like, transmembrane)                                            | 0.504 | 0.273 |
| <i>CLPX</i>       | chr15:65440555-65477675   | caseinolytic mitochondrial matrix peptidase chaperone subunit                    | 0.595 | 0.415 |
| <i>CLRN3</i>      | chr10:129676113-129691211 | clarin 3                                                                         | 0.085 | 0.004 |
| <i>CLSTN3</i>     | chr12:7247145-7311530     | catsyntenin 3                                                                    | 0.404 | 0.2   |
| <i>CLUH</i>       | chr17:2592679-2616754     | clustered mitochondria (cluA/CLU1) homolog                                       | 0.567 | 0.401 |
| <i>CMBL</i>       | chr5:10250281-10308168    | carboxymethylenebutenolidase homolog (Pseudomonas)                               | 0.526 | 0.255 |
| <i>CMIP</i>       | chr16:81478774-81745367   | c-Maf inducing protein                                                           | 2.079 | 3.244 |
| <i>CMPK1</i>      | chr1:47799468-47844511    | cytidine/uridine monophosphate kinase 1                                          | 0.592 | 0.386 |
| <i>CNGA1</i>      | chr4:47937993-48018684    | cyclic nucleotide gated channel alpha 1                                          | 0.414 | 0.314 |
| <i>CNIH4</i>      | chr1:224544532-224567119  | cornichon family AMPA receptor auxiliary protein 4                               | 1.615 | 2.407 |
| <i>CNNM4</i>      | chr2:97426638-97477628    | cyclin and CBS domain divalent metal cation transport mediator 4                 | 2.951 | 5.294 |
| <i>CNTLN</i>      | chr9:17048973-17503917    | centlein                                                                         | 0.687 | 0.297 |
| <i>CNTNAP2</i>    | chr7:145813452-148118088  | contactin associated protein-like 2                                              | 1.866 | 2.473 |
| <i>CNTNAP4</i>    | chr16:76267777-76669564   | contactin associated protein like 4                                              | 0.459 | 0.283 |
| <i>COA3</i>       | chr17:40949635-40950743   | cytochrome c oxidase assembly factor 3                                           | 0.515 | 0.319 |
| <i>COA4</i>       | chr1:173583712-73681332   | cytochrome c oxidase assembly factor 4 homolog                                   | 0.662 | 0.457 |
| <i>COBL</i>       | chr7:51083908-51384540    | cordons-bleu WH2 repeat protein                                                  | 0.751 | 0.353 |
| <i>COG4</i>       | chr16:70514414-70557458   | component of oligomeric golgi complex 4                                          | 0.668 | 0.481 |
| <i>COG7</i>       | chr16:23399813-23464585   | component of oligomeric golgi complex 7                                          | 0.645 | 0.459 |
| <i>COL12A1</i>    | chr6:75794041-75915970    | collagen type XII alpha 1                                                        | 2.252 | 3.763 |
| <i>COL18A1</i>    | chr21:46825096-46962385   | collagen type XVIII alpha 1                                                      | 0.488 | 0.208 |
| <i>COL21A1</i>    | chr6:55921387-56112378    | collagen type XXI alpha 1                                                        | 0.617 | 0.484 |
| <i>COL28A1</i>    | chr7:7310420-7575460      | collagen type XXVIII alpha 1                                                     | 0.291 | 0.285 |
| <i>COL4A1</i>     | chr13:110801309-110959519 | collagen type IV alpha 1                                                         | 1.611 | 3.592 |
| <i>COL4A2</i>     | chr13:110959630-111165438 | collagen type IV alpha 2                                                         | 1.636 | 3.351 |
| <i>COL4A5</i>     | chrX:107682995-107940775  | collagen type IV alpha 5                                                         | 0.554 | 0.355 |
| <i>COL5A1</i>     | chr9:137533563-137736688  | collagen type V alpha 1                                                          | 1.619 | 2.731 |
| <i>COLQ</i>       | chr3:15491639-15643180    | collagen-like tail subunit (single strand of homotrimer) of asymmetric acetylcho | 0.379 | 0.208 |
| <i>COPA</i>       | chr1:160246598-160328742  | coatamer protein complex subunit alpha                                           | 0.311 | 0.326 |
| <i>COQ5</i>       | chr12:120941059-120966964 | coenzyme Q5, methyltransferase                                                   | 0.584 | 0.341 |
| <i>COQ6</i>       | chr14:74396994-74551196   | coenzyme Q6, monooxygenase                                                       | 0.555 | 0.417 |
| <i>CORIN</i>      | chr4:47596017-47840059    | corin, serine peptidase                                                          | 2.187 | 8.786 |
| <i>CORO1C</i>     | chr12:109038884-109125326 | coronin 1C                                                                       | 1.831 | 2.038 |
| <i>COX14</i>      | chr12:50478852-50514240   | COX14 cytochrome c oxidase assembly factor                                       | 0.43  | 0.451 |
| <i>COX6A2</i>     | chr16:31439051-31439749   | cytochrome c oxidase subunit 6A2                                                 | 0.394 | 0.262 |
| <i>COX6B1</i>     | chr19:36139124-36149686   | cytochrome c oxidase subunit 6B1                                                 | 0.522 | 0.361 |
| <i>COX7A2</i>     | chr6:75947390-75953644    | cytochrome c oxidase subunit 7A2                                                 | 0.526 | 0.424 |
| <i>COX7C</i>      | chr5:85913704-85916749    | cytochrome c oxidase subunit 7C                                                  | 0.622 | 0.459 |
| <i>CP</i>         | chr3:148847370-148939843  | ceruloplasmin (ferroxidase)                                                      | 0.346 | 0.176 |
| <i>CPA4</i>       | chr7:129932973-129964020  | carboxypeptidase A4                                                              | 10.63 | 28.01 |
| <i>CPA6</i>       | chr8:68334404-68658621    | carboxypeptidase A6                                                              | 0.292 | 0.348 |
| <i>CPB2</i>       | chr13:46626982-46679211   | carboxypeptidase B2                                                              | 0.39  | 0.061 |
| <i>CPEB2</i>      | chr4:15004014-15071777    | cytoplasmic polyadenylation element binding protein 2                            | 1.719 | 2.941 |
| <i>CPED1</i>      | chr7:120628750-120937730  | cadherin like and PC-esterase domain containing 1                                | 0.352 | 0.237 |
| <i>CPM</i>        | chr12:69201970-69357020   | carboxypeptidase M                                                               | 0.955 | 0.414 |
| <i>CPN2</i>       | chr3:194060493-194072111  | carboxypeptidase N subunit 2                                                     | 0.281 | 0.114 |
| <i>CPNE4</i>      | chr3:131253576-131753844  | copine 4                                                                         | 2.082 | 5.392 |
| <i>CPT2</i>       | chr1:53656295-53686289    | carnitine palmitoyltransferase 2                                                 | 0.602 | 0.395 |
| <i>CRADD</i>      | chr12:94071150-94244531   | CASP2 and RIPK1 domain containing adaptor with death domain                      | 0.597 | 0.248 |
| <i>CRB3</i>       | chr19:6464259-6481798     | crumbs 3, cell polarity complex component                                        | 0.524 | 0.104 |
| <i>CREB3L3</i>    | chr19:4153597-4173051     | cAMP responsive element binding protein 3-like 3                                 | 0.075 | 0.014 |
| <i>CREB5</i>      | chr7:2833939-28865513     | cAMP responsive element binding protein 5                                        | 5.663 | 5.798 |
| <i>CREM</i>       | chr10:35415768-35501886   | cAMP responsive element modulator                                                | 1.853 | 2.304 |
| <i>CRHR1</i>      | chr17:43697709-43913194   | corticotropin releasing hormone receptor 1                                       | 0.57  | 0.341 |
| <i>CRIP3</i>      | chr6:43265713-43276530    | cysteine rich protein 3                                                          | 0.356 | 0.266 |
| <i>CRISPLD1</i>   | chr8:75860887-75946793    | cysteine rich secretory protein LCCL domain containing 1                         | 0.698 | 0.357 |
| <i>CRMP1</i>      | chr4:5712891-5894785      | collapsin response mediator protein 1                                            | 1.445 | 2.394 |
| <i>CRP</i>        | chr1:159682077-159726405  | C-reactive protein, pentraxin-related                                            | 0.221 | 0.071 |
| <i>CRY1</i>       | chr12:107385141-107487635 | cryptochrome circadian clock 1                                                   | 1.678 | 2.203 |
| <i>CRYAB</i>      | chr1:111779349-111782473  | crystallin alpha B                                                               | 0.521 | 0.189 |
| <i>CRYBB2</i>     | chr22:25615611-25627836   | crystallin beta B2                                                               | 0.845 | 2.301 |
| <i>CRYL1</i>      | chr13:20977804-21100012   | crystallin lambda 1                                                              | 0.684 | 0.476 |
| <i>CRYM</i>       | chr16:21269838-21329912   | crystallin mu                                                                    | 0.963 | 0.229 |
| <i>CRYZ</i>       | chr1:75171073-75232360    | crystallin zeta                                                                  | 0.414 | 0.141 |
| <i>CSF1</i>       | chr1:110453232-110473616  | colony stimulating factor 1                                                      | 2.175 | 3.677 |
| <i>CSGALNACT2</i> | chr10:43633892-43680756   | chondroitin sulfate N-acetylgalactosaminyltransferase 2                          | 2.034 | 3.063 |
| <i>CSDM3</i>      | chr8:113235158-114449376  | CUB and Sushi multiple domains 3                                                 | 0.463 | 0.275 |
| <i>CSPG4</i>      | chr15:75931425-76008618   | chondroitin sulfate proteoglycan 4                                               | 0.531 | 0.391 |
| <i>CSPG5</i>      | chr3:47603727-47621730    | chondroitin sulfate proteoglycan 5                                               | 3.95  | 6.3   |
| <i>CSRNP1</i>     | chr3:39183341-39195102    | cysteine and serine rich nuclear protein 1                                       | 1.751 | 2.81  |
| <i>CSRNP2</i>     | chr12:51454987-51477454   | cysteine and serine rich nuclear protein 2                                       | 2.031 | 3.137 |
| <i>CSRNP3</i>     | chr2:166326156-166545917  | cysteine and serine rich nuclear protein 3                                       | 0.576 | 0.453 |
| <i>CSRP1</i>      | chr1:201452657-201476387  | cysteine and glycine rich protein 1                                              | 1.643 | 2.437 |
| <i>CST7</i>       | chr20:24922507-24942898   | cystatin F                                                                       | 0.071 | 0.044 |
| <i>CTH</i>        | chr1:70876854-70911330    | cystathionine gamma-lyase                                                        | 1.462 | 2.21  |
| <i>CTPS2</i>      | chrX:16606121-16731059    | CTP synthase 2                                                                   | 0.628 | 0.291 |
| <i>CTSO</i>       | chr4:156845269-156875048  | cathepsin O                                                                      | 0.506 | 0.34  |
| <i>CTSS</i>       | chr1:150702671-150738433  | cathepsin S                                                                      | 0.508 | 0.096 |
| <i>CTXN1</i>      | chr19:7989380-7991051     | cortexin 1                                                                       | 5.833 | 8.958 |
| <i>CUEDC2</i>     | chr10:104183001-104196246 | CUE domain containing 2                                                          | 0.674 | 0.439 |
| <i>CUL2</i>       | chr10:35297465-35389841   | culin 2                                                                          | 0.678 | 0.441 |
| <i>CUTC</i>       | chr10:101419262-101515894 | cutC copper transporter                                                          | 0.869 | 0.449 |

|          |                           |                                                                                |       |       |
|----------|---------------------------|--------------------------------------------------------------------------------|-------|-------|
| CUX2     | chr12:111471827-111788479 | cut like homeobox 2                                                            | 0.575 | 0.249 |
| CX3CL1   | chr16:57406413-57418962   | C-X3-C motif chemokine ligand 1                                                | 3.603 | 2.286 |
| CXADR    | chr21:18885223-18965897   | coxsackie virus and adenovirus receptor                                        | 0.788 | 0.495 |
| CXCL1    | chr4:74735108-74737019    | C-X-C motif chemokine ligand 1                                                 | 0.359 | 0.043 |
| CXCL10   | chr4:76932332-77033955    | C-X-C motif chemokine ligand 10                                                | 0.315 | 0.038 |
| CXCL13   | chr4:78432906-78532988    | C-X-C motif chemokine ligand 13                                                | 0.096 | 0.118 |
| CXCL2    | chr4:74962750-74964999    | C-X-C motif chemokine ligand 2                                                 | 0.274 | 0.052 |
| CXCL3    | chr4:74902305-74904512    | C-X-C motif chemokine ligand 3                                                 | 0.566 | 0.297 |
| CXorf48  | chrX:134290460-134305751  | cancer/testis antigen 55                                                       | 0.659 | 0.246 |
| CYB5A    | chr18:71920526-71959251   | cytochrome b5 type A                                                           | 0.289 | 0.1   |
| CYB5RL   | chr1:54635323-54665746    | cytochrome b5 reductase like                                                   | 0.568 | 0.382 |
| CYBA     | chr16:88709443-88729558   | cytochrome b-245 alpha chain                                                   | 0.381 | 0.321 |
| CYGB     | chr17:74523429-74553748   | cytoglobin                                                                     | 0.21  | 0.184 |
| CYLD     | chr16:50775816-50835846   | CYLD lysine 63 deubiquitinase                                                  | 1.483 | 2.262 |
| CYP1A1   | chr15:75011882-75017979   | cytochrome P450 family 1 subfamily A member 1                                  | 0.318 | 0.086 |
| CYP1B1   | chr2:38294745-38303323    | cytochrome P450 family 1 subfamily B member 1                                  | 1.717 | 2.828 |
| CYP21A1P | chr6:31971728-31981050    | cytochrome P450 family 21 subfamily A member 1, pseudogene                     | 0.15  | 0.048 |
| CYP21A2  | chr6:32006092-32077151    | cytochrome P450 family 21 subfamily A member 2                                 | 0.151 | 0.042 |
| CYP2A6   | chr19:41344771-41357163   | cytochrome P450 family 2 subfamily A member 6                                  | 0.245 | 0.101 |
| CYP2B6   | chr19:41430169-41524301   | cytochrome P450 family 2 subfamily B member 6                                  | 0.167 | 0.057 |
| CYP2B7P1 | chr19:41430169-41524301   | cytochrome P450 family 2 subfamily B member 7, pseudogene                      | 0.167 | 0.057 |
| CYP2C18  | chr10:96442636-96495947   | cytochrome P450 family 2 subfamily C member 18                                 | 0.238 | 0.041 |
| CYP2C19  | chr10:96522462-96612671   | cytochrome P450 family 2 subfamily C member 19                                 | 0.253 | 0.049 |
| CYP2C8   | chr10:96796528-96829254   | cytochrome P450 family 2 subfamily C member 8                                  | 0.215 | 0.07  |
| CYP2C9   | chr10:96698384-96749148   | cytochrome P450 family 2 subfamily C member 9                                  | 0.178 | 0.052 |
| CYP2E1   | chr10:135238569-135392077 | cytochrome P450 family 2 subfamily E member 1                                  | 0.267 | 0.094 |
| CYP2J2   | chr1:60358931-60394390    | cytochrome P450 family 2 subfamily J member 2                                  | 0.607 | 0.313 |
| CYP39A1  | chr6:46517444-46646658    | cytochrome P450 family 39 subfamily A member 1                                 | 0.458 | 0.202 |
| CYP3A4   | chr7:99354582-99381904    | cytochrome P450 family 3 subfamily A member 4                                  | 0.207 | 0.044 |
| CYP3A5   | chr7:99211435-99277643    | cytochrome P450 family 3 subfamily A member 5                                  | 0.377 | 0.138 |
| CYP3A7   | chr7:99282301-99332819    | cytochrome P450 family 3 subfamily A member 7                                  | 0.129 | 0.013 |
| CYP4B1   | chr1:47264669-47285021    | cytochrome P450 family 4 subfamily B member 1                                  | 0.226 | 0.105 |
| CYP4F22  | chr19:15599615-15663254   | cytochrome P450 family 4 subfamily F member 22                                 | 0.286 | 0.146 |
| CYP4X1   | chr1:47489239-47516423    | cytochrome P450 family 4 subfamily X member 1                                  | 0.098 | 0.019 |
| CYP51A1  | chr7:91741462-91764059    | cytochrome P450 family 51 subfamily A member 1                                 | 0.525 | 0.393 |
| CYP7B1   | chr6:65500285-65711444    | cytochrome P450 family 7 subfamily B member 1                                  | 0.834 | 0.494 |
| CYP8B1   | chr3:42913683-42917633    | cytochrome P450 family 8 subfamily B member 1                                  | 0.09  | 0.005 |
| CYR61    | chr1:86046443-86049648    | cysteine rich angiogenic inducer 61                                            | 2.754 | 2.702 |
| CYTH2    | chr19:48972392-48985608   | cytohesin 2                                                                    | 1.672 | 2.749 |
| CYTH3    | chr7:6201405-6312242      | cytohesin 3                                                                    | 2.571 | 5.589 |
| CYYR1    | chr21:27778278-27945581   | cysteine and tyrosine rich 1                                                   | 3.034 | 5.226 |
| DAAM2    | chr6:39760158-39902290    | dishevelled associated activator of morphogenesis 2                            | 0.329 | 0.219 |
| DAB1     | chr1:57462084-58716211    | DAB1, reelin adaptor protein                                                   | 0.388 | 0.131 |
| DACH2    | chrX:85403454-86087605    | dachshund family transcription factor 2                                        | 1.395 | 3.229 |
| DACT1    | chr14:59100785-59115038   | dishevelled-binding antagonist of beta-catenin 1                               | 2.288 | 4.098 |
| DACT3    | chr19:47150868-47220384   | dishevelled-binding antagonist of beta-catenin 3                               | 2.811 | 5.658 |
| DAGLB    | chr7:6448208-6488045      | diacylglycerol lipase beta                                                     | 1.862 | 2.074 |
| DAO      | chr12:109270653-109294797 | D-amino-acid oxidase                                                           | 0.189 | 0.011 |
| DARS     | chr2:136664253-136765351  | aspartyl-tRNA synthetase                                                       | 0.558 | 0.336 |
| DARS2    | chr1:173768687-173828196  | aspartyl-tRNA synthetase 2, mitochondrial                                      | 0.626 | 0.468 |
| DBH      | chr9:136501484-136525168  | dopamine beta-hydroxylase                                                      | 0.061 | 0.029 |
| DBI      | chr2:120124503-120130122  | diazepam binding inhibitor (GABA receptor modulator, acyl-CoA binding protein) | 0.532 | 0.341 |
| DBN1     | chr5:176883613-176924602  | drebrin 1                                                                      | 3.192 | 6.473 |
| DBT      | chr1:100598626-100715613  | dihydroliipoamide branched chain transacylase E2                               | 0.465 | 0.351 |
| DCAF11   | chr14:24583277-24594451   | DDB1 and CUL4 associated factor 11                                             | 0.453 | 0.309 |
| DCAF6    | chr1:167885912-168045083  | DDB1 and CUL4 associated factor 6                                              | 0.616 | 0.386 |
| DCBLD1   | chr6:117803652-117923705  | discoilin, CUB and LCCL domain containing 1                                    | 2.103 | 4.514 |
| DCBLD2   | chr3:98433176-98620543    | discoilin, CUB and LCCL domain containing 2                                    | 1.617 | 2.234 |
| DCLK1    | chr13:35516377-36705967   | doublecortin like kinase 1                                                     | 6.652 | 10.59 |
| DCT      | chr13:95090241-95157244   | dopachrome tautomerase                                                         | 2.821 | 4.069 |
| DCUN1D3  | chr16:20866186-20936330   | defective in cullin neddylation 1 domain containing 3                          | 1.65  | 2.377 |
| DDC      | chr7:50526128-50633154    | dopa decarboxylase                                                             | 0.18  | 0.019 |
| DDIT3    | chr12:57881735-57914300   | DNA damage inducible transcript 3                                              | 4.953 | 9.093 |
| DDIT4    | chr10:74033676-74035797   | DNA damage inducible transcript 4                                              | 2.964 | 4.35  |
| DDO      | chr6:110712754-110736753  | D-aspartate oxidase                                                            | 0.532 | 0.191 |
| DDT      | chr22:24309025-24322019   | D-dopachrome tautomerase                                                       | 0.546 | 0.408 |
| DDTL     | chr22:24309025-24322019   | D-dopachrome tautomerase-like                                                  | 0.391 | 0.362 |
| DECR1    | chr8:91013579-91064227    | 2,4-dienoyl-CoA reductase 1, mitochondrial                                     | 0.408 | 0.128 |
| DENND1C  | chr19:6464259-6481798     | DENN domain containing 1C                                                      | 0.601 | 0.107 |
| DEPDC1   | chr1:68939834-68962799    | DEP domain containing 1                                                        | 0.581 | 0.376 |
| DEPDC7   | chr1:133037409-33055128   | DEP domain containing 7                                                        | 0.426 | 0.265 |
| DERA     | chr12:16064185-16190315   | deoxyribose-phosphate aldolase                                                 | 0.629 | 0.416 |
| DESI2    | chr1:244816351-244872339  | desumoylating isopeptidase 2                                                   | 1.696 | 2.533 |
| DFFB     | chr1:3773844-3802277      | DNA fragmentation factor subunit beta                                          | 0.367 | 0.186 |
| DGAT2    | chr1:175479777-75512581   | diacylglycerol O-acyltransferase 2                                             | 0.424 | 0.351 |
| DGCR5    | chr22:18957996-18982142   | DIGeorge syndrome critical region gene 5 (non-protein coding)                  | 4.64  | 8.66  |
| DGKH     | chr13:42614171-42817141   | diacylglycerol kinase eta                                                      | 1.526 | 2.269 |
| DGKZ     | chr1:146354454-46402104   | diacylglycerol kinase zeta                                                     | 1.714 | 2.633 |
| DHCR24   | chr1:55315299-55352921    | 24-dehydrocholesterol reductase                                                | 0.488 | 0.184 |
| DHCR7    | chr1:171145456-71159477   | 7-dehydrocholesterol reductase                                                 | 0.498 | 0.354 |
| DHHDH    | chr19:49436938-49448226   | dihydrodiol dehydrogenase                                                      | 1.547 | 3.306 |
| DHODH    | chr16:72042582-72060891   | dihydroorotate dehydrogenase (quinone)                                         | 0.496 | 0.396 |
| DHRS1    | chr14:24759803-24787242   | dehydrogenase/reductase (SDR family) member 1                                  | 0.486 | 0.337 |
| DHRS2    | chr14:24105572-24114848   | dehydrogenase/reductase (SDR family) member 2                                  | 0.256 | 0.198 |
| DHRS3    | chr1:12627938-12682999    | dehydrogenase/reductase (SDR family) member 3                                  | 0.554 | 0.382 |
| DHTKD1   | chr10:12110933-12165348   | dehydrogenase E1 and transketolase domain containing 1                         | 0.476 | 0.347 |
| DHX34    | chr19:47852531-47886062   | DEAH-box helicase 34                                                           | 1.726 | 2.69  |
| DHX58    | chr17:40253421-40264861   | DEXH-box helicase 58                                                           | 0.648 | 0.431 |
| DIAPH2   | chrX:95939661-96860069    | diaphanous related formin 2                                                    | 0.525 | 0.372 |
| DIAPH3   | chr13:60239720-60738119   | diaphanous related formin 3                                                    | 0.995 | 0.4   |
| DIO1     | chr1:54359860-54376759    | deiodinase, iodothyronine type I                                               | 0.291 | 0.076 |
| DIRAS3   | chr1:68167148-68698405    | DIRAS family GTP binding RAS like 3                                            | 0.778 | 0.317 |
| DKK1     | chr10:54074040-54077493   | dickkopf WNT signaling pathway inhibitor 1                                     | 0.363 | 0.337 |
| DKK2     | chr4:107842958-107957453  | dickkopf WNT signaling pathway inhibitor 2                                     | 3.047 | 8.697 |
| DLD      | chr7:107531573-107643804  | dihydroliipoamide dehydrogenase                                                | 0.561 | 0.328 |
| DLGAP4   | chr20:34995443-35157040   | discs large homolog associated protein 4                                       | 2.922 | 5.938 |
| DLGAP5   | chr14:55613239-55658396   | discs large homolog associated protein 5                                       | 0.261 | 0.165 |
| DMGDH    | chr5:78292796-78531831    | dimethylglycine dehydrogenase                                                  | 0.497 | 0.148 |
| DNAAF3   | chr19:55669678-55678090   | dynein (axonemal) assembly factor 3                                            | 2.137 | 4.468 |
| DNAJB1   | chr19:14625578-14629201   | DnaJ heat shock protein family (Hsp40) member B1                               | 1.837 | 2.269 |
| DNAJB2   | chr2:220144039-220151622  | DnaJ heat shock protein family (Hsp40) member B2                               | 1.536 | 2.098 |
| DNAJB9   | chr7:108210188-108215294  | DnaJ heat shock protein family (Hsp40) member B9                               | 1.279 | 2.348 |
| DNAJC1   | chr10:22044718-22292671   | DnaJ heat shock protein family (Hsp40) member C1                               | 2.066 | 3.076 |

|            |                           |                                                                  |       |       |
|------------|---------------------------|------------------------------------------------------------------|-------|-------|
| DNAJC17    | chr15:41060066-41106768   | DnaJ heat shock protein family (Hsp40) member C17                | 0.518 | 0.229 |
| DNAJC22    | chr12:49740987-49751545   | DnaJ heat shock protein family (Hsp40) member C22                | 0.589 | 0.254 |
| DNAJC28    | chr21:34860015-34864129   | DnaJ heat shock protein family (Hsp40) member C28                | 0.722 | 0.34  |
| DNAJC6     | chr1:65713909-65881552    | DnaJ heat shock protein family (Hsp40) member C6                 | 3.55  | 6.997 |
| DNAJC7     | chr17:40118704-40190044   | DnaJ heat shock protein family (Hsp40) member C7                 | 0.744 | 0.473 |
| DNAL1      | chr1:38022519-38061586    | dynein axonemal light intermediate chain 1                       | 0.684 | 0.438 |
| DNER       | chr2:230222344-230579286  | delta/notch like EGF repeat containing                           | 0.412 | 0.328 |
| DNM1P41    | chr15:85045805-85123412   | dynamitin 1 pseudogene 41                                        | 1.69  | 2.207 |
| DNMT3L     | chr21:45663024-45682099   | DNA (cytosine-5-)-methyltransferase 3-like                       | 1.35  | 3.527 |
| DNPH1      | chr6:43193366-43197211    | 2'-deoxynucleoside 5'-phosphate N-hydrolase 1                    | 0.507 | 0.272 |
| DOCK11     | chrX:117629840-117820123  | dedicator of cytokinesis 11                                      | 2.863 | 2.904 |
| DOCK5      | chr8:25042214-25273233    | dedicator of cytokinesis 5                                       | 1.733 | 2.766 |
| DOLPP1     | chr9:131843382-131852717  | dolichyldiphosphatase 1                                          | 0.705 | 0.426 |
| DOPEY2     | chr21:37529005-37666769   | dopey family member 2                                            | 2.261 | 3.581 |
| DPP4       | chr2:162848719-162931052  | dipeptidyl peptidase 4                                           | 0.669 | 0.3   |
| DPYD       | chr1:97487823-98386615    | dihydropyrimidine dehydrogenase                                  | 0.477 | 0.269 |
| DPYS       | chr8:105391651-105482804  | dihydropyrimidinase                                              | 0.229 | 0.067 |
| DPYSL3     | chr5:146770370-146889619  | dihydropyrimidinase like 3                                       | 2.144 | 3.018 |
| DRAP1      | chr11:65686727-65689048   | DR1 associated protein 1                                         | 2.02  | 3.109 |
| DSE        | chr6:116580059-116759546  | dermatan sulfate epimerase                                       | 1.693 | 2.298 |
| DTNB       | chr2:2559889-25896516     | dystrobrevin beta                                                | 1.71  | 2.191 |
| DTX4       | chr11:58939659-58980494   | deltex 4, E3 ubiquitin ligase                                    | 0.61  | 0.418 |
| DUSP10     | chr1:221874763-221915832  | dual specificity phosphatase 10                                  | 2.407 | 3.752 |
| DUSP12     | chr1:161718341-161726952  | dual specificity phosphatase 12                                  | 1.464 | 2.049 |
| DUSP18     | chr22:31049846-31063906   | dual specificity phosphatase 18                                  | 1.709 | 2.375 |
| DUSP4      | chr8:29190578-29208267    | dual specificity phosphatase 4                                   | 2.117 | 5.773 |
| DUSP5      | chr10:112257624-112271302 | dual specificity phosphatase 5                                   | 14.32 | 24.98 |
| DUSP6      | chr12:89741836-89746296   | dual specificity phosphatase 6                                   | 4.797 | 9.828 |
| DUSP7      | chr3:52082936-52090461    | dual specificity phosphatase 7                                   | 1.836 | 2.789 |
| DUSP8      | chr1:1489691-1785501      | dual specificity phosphatase 8                                   | 3.764 | 4.114 |
| DUSP9      | chrX:152890864-152916781  | dual specificity phosphatase 9                                   | 0.109 | 0.038 |
| DVL3       | chr3:183873141-183891391  | dishevelled segment polarity protein 3                           | 1.478 | 2.549 |
| DYNC2L1    | chr2:44001177-44037539    | dynein cytoplasmic 2 light intermediate chain 1                  | 0.695 | 0.472 |
| E2F7       | chr12:77415025-77459893   | E2F transcription factor 7                                       | 2.102 | 2.373 |
| E2F8       | chr1:19245609-19263202    | E2F transcription factor 8                                       | 0.778 | 0.044 |
| EBP        | chrX:48380129-48387105    | emopamil binding protein (sterol isomerase)                      | 0.47  | 0.212 |
| EBPL       | chr13:50234809-50265754   | emopamil binding protein like                                    | 0.5   | 0.285 |
| ECE1       | chr1:21543739-21672034    | endothelin converting enzyme 1                                   | 1.379 | 2.09  |
| ECH1       | chr19:39306061-39322497   | enoyl-CoA hydratase 1, peroxisomal                               | 0.612 | 0.463 |
| ECHDC2     | chr1:53361581-53387446    | enoyl-CoA hydratase domain containing 2                          | 0.394 | 0.177 |
| ECHDC3     | chr10:11784355-11806065   | enoyl-CoA hydratase domain containing 3                          | 0.577 | 0.316 |
| ECHS1      | chr10:135175986-135186908 | enoyl-CoA hydratase, short chain, 1, mitochondrial               | 0.602 | 0.362 |
| ECI2       | chr6:4068592-4135831      | enoyl-CoA delta isomerase 2                                      | 0.466 | 0.3   |
| ECM2       | chr9:95059196-95432547    | extracellular matrix protein 2                                   | 0.219 | 0.033 |
| ECT2       | chr3:172468347-172546450  | epithelial cell transforming 2                                   | 0.735 | 0.406 |
| EDA        | chrX:68835910-69259321    | ectodysplasin A                                                  | 1.53  | 2.414 |
| EDN2       | chr1:41944445-41950344    | endothelin 2                                                     | 0.071 | 0.018 |
| EDNRA      | chr4:148279018-148466106  | endothelin receptor type A                                       | 1.585 | 2.282 |
| EDNRB      | chr13:78469615-78549674   | endothelin receptor type B                                       | 0.482 | 0.408 |
| EFCA11     | chr14:90263468-90421089   | EF-hand calcium binding domain 11                                | 0.696 | 0.296 |
| EFNA1      | chr1:155100348-155107386  | ephrin A1                                                        | 0.291 | 0.171 |
| EGFL8      | chr6:32120578-32145888    | EGF like domain multiple 8                                       | 0.632 | 0.244 |
| EGFR       | chr7:55086362-55279462    | epidermal growth factor receptor                                 | 2.332 | 3.645 |
| EGR1       | chr5:137801180-137805004  | early growth response 1                                          | 4.951 | 8.461 |
| EGR2       | chr10:64571755-64578927   | early growth response 2                                          | 3.392 | 3.304 |
| EHBP1      | chr2:62900985-63275656    | EH domain binding protein 1                                      | 0.485 | 0.37  |
| EHBP1L1    | chr1:165333590-65360117   | EH domain binding protein 1 like 1                               | 1.588 | 2.094 |
| EHD4       | chr15:42188093-42264858   | EH domain containing 4                                           | 2.095 | 2.474 |
| EHHADH     | chr3:184880688-184971886  | enoyl-CoA, hydratase/3-hydroxyacyl CoA dehydrogenase             | 0.263 | 0.065 |
| EHMT2      | chr6:31847536-31865466    | euchromatic histone-lysine N-methyltransferase 2                 | 0.624 | 0.399 |
| EIF1       | chr17:39845126-39847898   | eukaryotic translation initiation factor 1                       | 1.803 | 3.028 |
| EIF2S2     | chr20:32581299-32700091   | eukaryotic translation initiation factor 2 subunit beta          | 1.89  | 2.392 |
| EIF4A3     | chr17:78109012-78120982   | eukaryotic translation initiation factor 4A3                     | 1.71  | 2.117 |
| EIF4B      | chr12:53400061-53435993   | eukaryotic translation initiation factor 4B                      | 0.671 | 0.483 |
| EIF4EBP1   | chr8:37887848-37917883    | eukaryotic translation initiation factor 4E binding protein 1    | 2.541 | 3.894 |
| EIF4EBP2   | chr10:72163860-72188374   | eukaryotic translation initiation factor 4E binding protein 2    | 1.4   | 2.411 |
| ELMO1      | chr7:36892510-37488895    | engulfment and cell motility 1                                   | 0.3   | 0.108 |
| ELMSAN1    | chr14:74181786-74256662   | ELM2 and Myb/SANT domain containing 1                            | 2.013 | 3.457 |
| ELOVL7     | chr5:60047571-60140176    | ELOVL fatty acid elongase 7                                      | 1.606 | 2.21  |
| EMB        | chr5:49678949-49779711    | embigin                                                          | 0.179 | 0.108 |
| EMILIN3    | chr20:39969412-39995498   | elastin microfibril interfacer 3                                 | 2.279 | 0.192 |
| EML1       | chr14:100259738-100408395 | echinoderm microtubule associated protein like 1                 | 2.562 | 3.327 |
| EML5       | chr14:89029252-89259225   | echinoderm microtubule associated protein like 5                 | 1.664 | 3.439 |
| EML6       | chr2:54951688-55199156    | echinoderm microtubule associated protein like 6                 | 1.936 | 2.681 |
| EMP2       | chr16:10622278-10674539   | epithelial membrane protein 2                                    | 0.382 | 0.183 |
| EMX1       | chr2:73143230-73163973    | empty spiracles homeobox 1                                       | 0.471 | 0.328 |
| ENC1       | chr5:73923230-73937249    | ectodermal-neural cortex 1                                       | 1.936 | 2.31  |
| ENDOD1     | chr1:94822973-94865815    | endonuclease domain containing 1                                 | 1.985 | 2.254 |
| ENKUR      | chr10:25137553-25351640   | enkurin, TRPC channel interacting protein                        | 0.277 | 0.136 |
| ENOSF1     | chr18:596997-712662       | enolase superfamily member 1                                     | 0.585 | 0.417 |
| ENOX1      | chr13:43787665-44361116   | ecto-NOX disulfide-thiol exchanger 1                             | 2.465 | 3.435 |
| ENPEP      | chr4:111397193-111484493  | glutamyl aminopeptidase                                          | 0.482 | 0.111 |
| EPB41      | chr1:29213586-29450421    | erythrocyte membrane protein band 4.1                            | 0.749 | 0.461 |
| EPB41L4B   | chr9:111934253-112083021  | erythrocyte membrane protein band 4.1 like 4B                    | 0.736 | 0.468 |
| EPB49      | chr8:21906452-21940036    | dermatin actin binding protein                                   | 0.648 | 0.422 |
| EPHA2      | chr1:16450831-16513739    | EPH receptor A2                                                  | 3.114 | 2.598 |
| EPHA5      | chr4:66185280-66559104    | EPH receptor A5                                                  | 1.928 | 3.729 |
| EPHB2      | chr1:23037330-23241874    | EPH receptor B2                                                  | 3.982 | 9.123 |
| EPHX2      | chr8:27348518-27472328    | epoxide hydrolase 2                                              | 0.427 | 0.193 |
| EPS8L2     | chr1:1706119-727727       | EPS8 like 2                                                      | 0.437 | 0.16  |
| EPS8L3     | chr1:110292701-110306644  | EPS8 like 3                                                      | 0.436 | 0.086 |
| ERAP2      | chr5:96208994-96385073    | endoplasmic reticulum aminopeptidase 2                           | 0.392 | 0.267 |
| ERC2       | chr3:55542335-56502436    | ELKS/RAB6-interacting/CAST family member 2                       | 1.299 | 2.48  |
| EREG       | chr4:75230859-75254477    | epiregulin                                                       | 4.385 | 7.46  |
| ERI2       | chr16:20775311-20860990   | ERI1 exonuclease family member 2                                 | 0.705 | 0.371 |
| ERN1       | chr17:62116519-62207510   | endoplasmic reticulum to nucleus signaling 1                     | 2.144 | 4.274 |
| ERP27      | chr12:15066975-15091463   | endoplasmic reticulum protein 27                                 | 0.631 | 0.142 |
| ERVMER34-1 | chr4:53608564-53617807    | endogenous retrovirus group MER34 member 1                       | 2.672 | 4.514 |
| ESCO2      | chr8:27590832-27662424    | establishment of sister chromatid cohesion N-acetyltransferase 2 | 0.624 | 0.057 |
| ESD        | chr13:47345390-47371819   | esterase D                                                       | 0.51  | 0.308 |
| ESPL1      | chr12:53662082-53687427   | extra spindle pole bodies like 1, separate                       | 0.337 | 0.225 |
| ESPN       | chr1:6484847-6580121      | espin                                                            | 0.15  | 0.07  |
| ESRP2      | chr16:68119006-68271538   | epithelial splicing regulatory protein 2                         | 0.269 | 0.111 |

|          |                           |                                                           |       |       |
|----------|---------------------------|-----------------------------------------------------------|-------|-------|
| ESRRG    | chr1:216676587-217311097  | estrogen related receptor gamma                           | 0.423 | 0.239 |
| ESYT1    | chr12:56521985-56538460   | extended synaptotagmin protein 1                          | 2.171 | 2.542 |
| ETFA     | chr15:76352298-76603810   | electron transfer flavoprotein alpha subunit              | 0.65  | 0.408 |
| ETFB     | chr19:51848408-51869672   | electron transfer flavoprotein beta subunit               | 0.625 | 0.243 |
| ETNK2    | chr1:204100176-204121307  | ethanolamine kinase 2                                     | 0.168 | 0.069 |
| ETS1     | chr1:128328655-128457453  | ETS proto-oncogene 1, transcription factor                | 1.543 | 2.295 |
| ETV1     | chr7:13930855-14031050    | ETS variant 1                                             | 0.522 | 0.368 |
| EVA1B    | chr1:36771993-36795049    | eva-1 homolog B (C. elegans)                              | 1.836 | 2.97  |
| EVC      | chr4:5712891-5894785      | EvC ciliary complex subunit 1                             | 1.429 | 2.231 |
| EVC2     | chr4:5564145-5711275      | EvC ciliary complex subunit 2                             | 1.843 | 2.454 |
| EVPLL    | chr17:18281063-18292960   | envoplakin-like                                           | 0.234 | 0.105 |
| EXT1     | chr8:118811347-119124104  | exostosin glycosyltransferase 1                           | 1.647 | 2.268 |
| EXTL1    | chr12:26335416-26363108   | exostosin-like glycosyltransferase 1                      | 0.326 | 0.181 |
| EXTL3    | chr8:28558989-28611207    | exostosin like glycosyltransferase 3                      | 1.327 | 2.102 |
| EYA1     | chr8:72109667-72448026    | EYA transcriptional coactivator and phosphatase 1         | 0.569 | 0.379 |
| EZH2     | chr7:148504463-148581441  | enhancer of zeste 2 polycomb repressive complex 2 subunit | 2.171 | 2.701 |
| F10      | chr13:11377107-113805079  | coagulation factor X                                      | 0.417 | 0.144 |
| F11      | chr4:187181417-187422212  | coagulation factor XI                                     | 0.271 | 0.041 |
| F12      | chr5:176829133-176836708  | coagulation factor XII                                    | 0.754 | 0.197 |
| F13B     | chr1:197007888-197036397  | coagulation factor XIII B chain                           | 0.226 | 0.045 |
| F2       | chr1:146740742-46761056   | coagulation factor II, thrombin                           | 0.559 | 0.135 |
| F3       | chr1:94994731-95007413    | coagulation factor III, tissue factor                     | 2.287 | 3.101 |
| F5       | chr1:169481191-169555840  | coagulation factor V                                      | 0.362 | 0.048 |
| F9       | chrX:138612894-138647837  | coagulation factor IX                                     | 0.604 | 0.11  |
| FABP1    | chr2:88422507-88427650    | fatty acid binding protein 1                              | 0.056 | 0.031 |
| FADS1    | chr1:161567096-161634825  | fatty acid desaturase 1                                   | 0.835 | 0.425 |
| FADS3    | chr1:161640991-161659062  | fatty acid desaturase 3                                   | 2.412 | 2.71  |
| FAH      | chr15:80445130-80489121   | fumarylacetoacetate hydrolase (fumarylacetoacetase)       | 0.309 | 0.168 |
| FAM109A  | chr12:111798454-111806955 | family with sequence similarity 109 member A              | 1.704 | 2.271 |
| FAM110B  | chr8:58907069-59062551    | family with sequence similarity 110 member B              | 2.362 | 4.032 |
| FAM115C  | chr7:143317885-143427571  | TRPM8 channel associated factor 2                         | 0.867 | 0.458 |
| FAM127B  | chrX:134184962-134186221  | family with sequence similarity 127 member B              | 1.695 | 2.477 |
| FAM131A  | chr3:184053655-184079439  | family with sequence similarity 131 member A              | 1.813 | 2.344 |
| FAM134A  | chr2:220036618-220050197  | family with sequence similarity 134 member A              | 1.574 | 2.426 |
| FAM134B  | chr5:16473146-16617167    | family with sequence similarity 134 member B              | 0.745 | 0.416 |
| FAM13A   | chr4:89630939-90032516    | family with sequence similarity 13 member A               | 0.286 | 0.19  |
| FAM13B   | chr5:137225124-137369557  | family with sequence similarity 13 member B               | 1.911 | 2.56  |
| FAM13C   | chr10:60936347-61123601   | family with sequence similarity 13 member C               | 0.338 | 0.174 |
| FAM162A  | chr3:122103022-122128961  | family with sequence similarity 162 member A              | 0.566 | 0.372 |
| FAM167A  | chr8:11197145-11332199    | family with sequence similarity 167 member A              | 2.201 | 5.744 |
| FAM168B  | chr2:131805447-131851004  | family with sequence similarity 168 member B              | 1.344 | 2.126 |
| FAM171A2 | chr17:42430901-42441235   | family with sequence similarity 171 member A2             | 2.784 | 4.589 |
| FAM184A  | chr6:119280995-119470358  | family with sequence similarity 184 member A              | 0.842 | 0.369 |
| FAM189A2 | chr9:71939487-72007483    | family with sequence similarity 189 member A2             | 2.712 | 3.948 |
| FAM195A  | chr16:691830-699220       | MAPK regulated co-repressor interacting protein 2         | 0.422 | 0.37  |
| FAM195B  | chr17:79780292-79791167   | MAPK regulated co-repressor interacting protein 1         | 2.866 | 5.016 |
| FAM198B  | chr4:159045731-159094202  | family with sequence similarity 198 member B              | 0.318 | 0.169 |
| FAM20A   | chr17:66507920-66597593   | family with sequence similarity 20 member A               | 0.354 | 0.116 |
| FAM211A  | chr17:16342300-16395505   | leucine rich repeat containing 75A                        | 3.06  | 7.955 |
| FAM212B  | chr1:112264576-112310199  | family with sequence similarity 212 member B              | 1.948 | 2.524 |
| FAM213A  | chr10:82167584-82196870   | family with sequence similarity 213 member A              | 0.678 | 0.307 |
| FAM219A  | chr9:34398111-34458568    | family with sequence similarity 219 member A              | 1.951 | 2.668 |
| FAM220A  | chr7:6369038-6388590      | family with sequence similarity 220 member A              | 1.535 | 2.116 |
| FAM222A  | chr12:110151812-110211292 | family with sequence similarity 222 member A              | 4.68  | 10.48 |
| FAM227A  | chr22:38974032-39069855   | family with sequence similarity 227 member A              | 1.684 | 2.507 |
| FAM3C    | chr7:120988904-121038465  | family with sequence similarity 3 member C                | 2.043 | 3.179 |
| FAM43A   | chr3:194406545-194409766  | family with sequence similarity 43 member A               | 3.521 | 7.5   |
| FAM47E   | chr4:77135192-77232283    | family with sequence similarity 47 member E               | 0.466 | 0.346 |
| FAM49A   | chr2:16730729-16847134    | family with sequence similarity 49 member A               | 2.483 | 5.858 |
| FAM53A   | chr4:1618559-1686016      | family with sequence similarity 53 member A               | 1.751 | 2.256 |
| FAM53B   | chr10:126306753-126480439 | family with sequence similarity 53 member B               | 1.427 | 2.445 |
| FAM5C    | chr1:190066782-190446759  | BMP/retinoic acid inducible neural specific 3             | 0.375 | 0.303 |
| FAM63A   | chr1:150954498-150980854  | family with sequence similarity 63 member A               | 0.377 | 0.241 |
| FAM65B   | chr6:24804512-25004893    | family with sequence similarity 65 member B               | 0.067 | 0.015 |
| FAM69B   | chr9:139607023-139622636  | family with sequence similarity 69 member B               | 2.972 | 6.838 |
| FAM72D   | chr1:143875655-144094409  | family with sequence similarity 72 member D               | 1.871 | 2.927 |
| FAM78B   | chr1:166039255-166135958  | family with sequence similarity 78 member B               | 0.769 | 0.437 |
| FAM86B1  | chr8:11973290-12293852    | family with sequence similarity 86 member B1              | 2.24  | 3.907 |
| FAM86B3P | chr8:8086091-8102387      | family with sequence similarity 86, member A pseudogene   | 1.763 | 2.305 |
| FAM86DP  | chr3:75463422-75484278    | family with sequence similarity 86, member D, pseudogene  | 1.919 | 3.419 |
| FAM86JP  | chr3:125635443-125656627  | family with sequence similarity 86, member A pseudogene   | 1.755 | 2.595 |
| FAM89A   | chr1:231152644-231175895  | family with sequence similarity 89 member A               | 2.126 | 2.907 |
| FAM96A   | chr15:64364760-64386207   | family with sequence similarity 96 member A               | 0.441 | 0.278 |
| FAM98C   | chr19:38893774-38916945   | family with sequence similarity 98 member C               | 0.606 | 0.421 |
| FANCD2   | chr3:9906149-10149915     | Fanconi anemia complementation group D2                   | 0.934 | 0.219 |
| FANCE    | chr6:35420106-35434990    | Fanconi anemia complementation group E                    | 2.383 | 3.439 |
| FARP1    | chr13:98794877-99102023   | FERM, ARH/RhoGEF and pleckstrin domain protein 1          | 1.534 | 2.264 |
| FARS2    | chr6:5108652-5771816      | phenylalanyl-tRNA synthetase 2, mitochondrial             | 0.633 | 0.492 |
| FASN     | chr17:80036213-80056106   | fatty acid synthase                                       | 0.342 | 0.254 |
| FASTKD2  | chr2:207602290-207660911  | FAST kinase domains 2                                     | 0.607 | 0.427 |
| FASTKD3  | chr5:7859268-7869169      | FAST kinase domains 3                                     | 0.665 | 0.344 |
| FBLIM1   | chr1:16084795-16113447    | filamin binding LIM protein 1                             | 2.505 | 3.005 |
| FBLN7    | chr2:112895961-112945993  | fibulin 7                                                 | 0.419 | 0.225 |
| FBXL7    | chr5:15500304-15939903    | F-box and leucine-rich repeat protein 7                   | 2.01  | 3.004 |
| FBXO2    | chr1:11708417-11723384    | F-box protein 2                                           | 0.712 | 0.484 |
| FBXO25   | chr8:356807-495781        | F-box protein 25                                          | 0.679 | 0.392 |
| FBXO36   | chr2:230628549-230878020  | F-box protein 36                                          | 0.608 | 0.364 |
| FBXO42   | chr1:16573245-16679003    | F-box protein 42                                          | 2.152 | 2.981 |
| FBXW4    | chr10:103370420-103454743 | F-box and WD repeat domain containing 4                   | 1.439 | 2.159 |
| FCGR1A   | chr1:149754244-149783928  | Fc fragment of IgG receptor Ia                            | 4.279 | 7.991 |
| FCGR1B   | chr1:120926127-120935944  | Fc fragment of IgG receptor Ib                            | 4.008 | 7.562 |
| FCGR2    | chr19:50015535-50029685   | Fc fragment of IgG receptor and transporter               | 0.6   | 0.234 |
| FDFT1    | chr8:11660189-11696848    | farnesyl-diphosphate farnesyltransferase 1                | 0.465 | 0.33  |
| FDPS     | chr1:155274495-155300909  | farnesyl diphosphate synthase                             | 0.45  | 0.216 |
| FEM1C    | chr5:114856398-114880591  | fem-1 homolog C                                           | 1.448 | 2.064 |
| FETUB    | chr3:186358148-186370797  | fetuin B                                                  | 0.254 | 0.074 |
| FGA      | chr4:155499904-155511897  | fibrinogen alpha chain                                    | 0.234 | 0.038 |
| FGB      | chr4:155484128-155493915  | fibrinogen beta chain                                     | 0.205 | 0.03  |
| FGD4     | chr12:32552474-32798984   | FYVE, RhoGEF and PH domain containing 4                   | 0.621 | 0.471 |
| FGF13    | chrX:137713733-138287647  | fibroblast growth factor 13                               | 2.25  | 2.104 |
| FGFR1    | chr8:38268222-38326352    | fibroblast growth factor receptor 1                       | 3.082 | 8.96  |
| FGFR2    | chr10:123237843-123357972 | fibroblast growth factor receptor 2                       | 1.696 | 2.72  |
| FGG      | chr4:155525285-155533918  | fibrinogen gamma chain                                    | 0.253 | 0.051 |

|          |                           |                                                                           |       |       |
|----------|---------------------------|---------------------------------------------------------------------------|-------|-------|
| FGGY     | chr1:59762488-60228402    | FGGY carbohydrate kinase domain containing                                | 0.538 | 0.265 |
| FGL1     | chr8:17721899-17753047    | fibrinogen like 1                                                         | 0.72  | 0.137 |
| FH       | chr1:241660856-241683085  | fumarate hydratase                                                        | 0.57  | 0.364 |
| FHDC1    | chr4:153839553-153900848  | FH2 domain containing 1                                                   | 1.754 | 2.285 |
| FHL1     | chrX:135225773-135338641  | four and a half LIM domains 1                                             | 1.854 | 2.205 |
| FHL2     | chr2:105977274-106055230  | four and a half LIM domains 2                                             | 2.581 | 3.119 |
| FICD     | chr12:108908937-108915189 | FIC domain containing                                                     | 2.2   | 4.464 |
| FIGN     | chr2:164459119-164592671  | figetin                                                                   | 0.605 | 0.298 |
| FILIP1   | chr6:76005489-76203503    | filamin A interacting protein 1                                           | 0.401 | 0.222 |
| FILIP1L  | chr3:99273152-99897476    | filamin A interacting protein 1-like                                      | 3.702 | 3.52  |
| FKBP5    | chr6:35541361-35704724    | FK506 binding protein 5                                                   | 0.684 | 0.471 |
| FKBP8    | chr19:18642567-18654383   | FK506 binding protein 8                                                   | 0.625 | 0.497 |
| FKRP     | chr19:47222767-47261832   | fukutin related protein                                                   | 1.577 | 2.042 |
| FLJ46906 | chr6:138725335-139018519  | uncharacterized LOC441172                                                 | 3.052 | 5.691 |
| FLNA     | chrX:153576754-153603006  | filamin A                                                                 | 2.872 | 2.482 |
| FLNB     | chr3:57994117-58157982    | filamin B                                                                 | 2.562 | 3.527 |
| FLOT2    | chr17:27206352-27224715   | flotillin 2                                                               | 0.624 | 0.387 |
| FLRT2    | chr14:85996487-86094270   | fibronectin leucine rich transmembrane protein 2                          | 2.094 | 2.825 |
| FLT1     | chr13:28874482-29069265   | fms related tyrosine kinase 1                                             | 0.99  | 2.48  |
| FMNL1    | chr17:43299291-43324958   | formin like 1                                                             | 0.253 | 0.308 |
| FMNL2    | chr2:153191668-153617998  | formin like 2                                                             | 3.534 | 6.361 |
| FMNL3    | chr12:50017196-50101256   | formin like 3                                                             | 1.972 | 4.255 |
| FMO3     | chr1:171060010-171086959  | flavin containing monooxygenase 3                                         | 0.242 | 0.055 |
| FMO4     | chr1:171283346-171311223  | flavin containing monooxygenase 4                                         | 0.365 | 0.147 |
| FMO5     | chr1:146626681-146767447  | flavin containing monooxygenase 5                                         | 0.154 | 0.014 |
| FN3K     | chr17:80693451-80709073   | fructosamine 3 kinase                                                     | 0.51  | 0.334 |
| FNBP1    | chr9:132649465-132805473  | formin binding protein 1                                                  | 2.013 | 3.188 |
| FOLR1    | chr1:171900601-171907367  | folate receptor 1 (adult)                                                 | 0.536 | 0.303 |
| FOS      | chr14:75745480-75748937   | FBJ murine osteosarcoma viral oncogene homolog                            | 4.838 | 5.944 |
| FOSL1    | chr1:65657289-65667997    | FOS like antigen 1                                                        | 11.84 | 18.99 |
| FOXA2    | chr20:22541179-22566101   | forkhead box A2                                                           | 0.509 | 0.316 |
| FOXF1    | chr16:86544132-86548070   | forkhead box F1                                                           | 2.46  | 3.329 |
| FOXK2    | chr17:80477593-80562663   | forkhead box K2                                                           | 1.818 | 3.048 |
| FOXO3B   | chr17:18561741-18585572   | forkhead box O3B pseudogene                                               | 1.444 | 2.268 |
| FOXP4    | chr6:41514128-41570122    | forkhead box P4                                                           | 1.801 | 3.612 |
| FOXQ1    | chr6:1312674-1314993      | forkhead box Q1                                                           | 3.224 | 2.012 |
| FOXRED1  | chr1:126138934-126148027  | FAD-dependent oxidoreductase domain containing 1                          | 0.592 | 0.391 |
| FPR1     | chr19:52249022-52255150   | formyl peptide receptor 1                                                 | 0.201 | 0.217 |
| FRAT1    | chr10:99078984-99081672   | frequently rearranged in advanced T-cell lymphomas 1                      | 0.469 | 0.21  |
| FRAT2    | chr10:99092253-99094458   | frequently rearranged in advanced T-cell lymphomas 2                      | 0.511 | 0.314 |
| FRK      | chr6:116252829-116567088  | fyn related Src family tyrosine kinase                                    | 0.295 | 0.091 |
| FRMD5    | chr15:44163008-44487478   | FERM domain containing 5                                                  | 2.957 | 7.633 |
| FRMD6    | chr14:51921229-52197444   | FERM domain containing 6                                                  | 2.465 | 3.713 |
| FSIP2    | chr2:186289622-186698126  | fibrous sheath interacting protein 2                                      | 0.73  | 0.371 |
| FSTL1    | chr3:120113060-120169918  | folistatin like 1                                                         | 0.534 | 0.24  |
| FSTL3    | chr9:676388-685215        | folistatin like 3                                                         | 2.189 | 4.069 |
| FSTL5    | chr4:162304913-163124576  | folistatin like 5                                                         | 0.775 | 0.471 |
| FUK      | chr16:70488370-70514177   | fuco kinase                                                               | 0.696 | 0.409 |
| FUOM     | chr10:135156169-135171539 | fucoase mutarotase                                                        | 0.463 | 0.351 |
| FXYD5    | chr19:35646524-35660788   | FXYD domain containing ion transport regulator 5                          | 2.229 | 3.742 |
| FYN      | chr6:111981534-112194655  | FYN proto-oncogene, Src family tyrosine kinase                            | 0.107 | 0.001 |
| FZD1     | chr7:90893782-90898132    | frizzled class receptor 1                                                 | 1.39  | 2.227 |
| FZD4     | chr11:86534447-86711989   | frizzled class receptor 4                                                 | 0.54  | 0.356 |
| FZD7     | chr2:202899223-202904324  | frizzled class receptor 7                                                 | 2.536 | 5.35  |
| G0S2     | chr1:209848669-209849735  | G0/G1 switch 2                                                            | 0.471 | 0.403 |
| G6PC     | chr17:41052813-41066450   | glucose-6-phosphatase catalytic subunit                                   | 0.109 | 0.034 |
| GAB3     | chrX:153903526-153979348  | GRB2 associated binding protein 3                                         | 1.426 | 2.218 |
| GABRA3   | chrX:151334677-151654766  | gamma-aminobutyric acid type A receptor alpha3 subunit                    | 1.331 | 2.277 |
| GADD45A  | chr1:68150859-68154021    | growth arrest and DNA damage inducible alpha                              | 6.815 | 3.126 |
| GALNT10  | chr5:153569697-153825382  | polypeptide N-acetylgalactosaminyltransferase 10                          | 1.78  | 3.288 |
| GALNT15  | chr3:16216047-16273367    | polypeptide N-acetylgalactosaminyltransferase 15                          | 0.124 | 0.05  |
| GALNT18  | chr11:11292420-11643570   | polypeptide N-acetylgalactosaminyltransferase 18                          | 2.162 | 2.913 |
| GALNT5   | chr2:158114073-158169951  | polypeptide N-acetylgalactosaminyltransferase 5                           | 0.206 | 0.075 |
| GALT     | chr9:34646480-34662689    | galactose-1-phosphate uridylyltransferase                                 | 0.585 | 0.417 |
| GAMT     | chr19:1383877-1401757     | guanidinoacetate N-methyltransferase                                      | 0.465 | 0.135 |
| GAREM    | chr18:29843483-30050447   | GRB2 associated regulator of MAPK1 subtype 1                              | 2.132 | 3.132 |
| GARS     | chr7:30634004-30673651    | glycyl-tRNA synthetase                                                    | 2.794 | 4.112 |
| GAS1     | chr9:8959276-89562104     | growth arrest specific 1                                                  | 0.434 | 0.256 |
| GAS2     | chr1:122649821-22834547   | growth arrest specific 2                                                  | 0.218 | 0.078 |
| GAS5     | chr1:173830655-173856528  | growth arrest specific 5 (non-protein coding)                             | 3.492 | 7.609 |
| GATAD2A  | chr19:19496622-19619741   | GATA zinc finger domain containing 2A                                     | 1.977 | 2.833 |
| GATM     | chr15:45650586-45672842   | glycine amidinotransferase                                                | 0.457 | 0.149 |
| GBA3     | chr4:22694547-22821192    | glucosylceramidase beta 3 (gene/pseudogene)                               | 0.241 | 0.011 |
| GBP2     | chr1:89570415-89591818    | guanylate binding protein 2                                               | 0.477 | 0.215 |
| GBP4     | chr1:89597433-89664633    | guanylate binding protein 4                                               | 0.251 | 0.102 |
| GC       | chr4:72607406-72671237    | group-specific component (vitamin D binding protein)                      | 0.659 | 0.127 |
| GCC1     | chr7:127219396-127225661  | GRIP and coiled-coil domain containing 1                                  | 2.36  | 3.5   |
| GCHFR    | chr15:41056284-41059911   | GTP cyclohydrolase I feedback regulator                                   | 0.407 | 0.409 |
| GCKR     | chr2:27714749-27750318    | glucokinase (hexokinase 4) regulator                                      | 0.291 | 0.118 |
| GCLM     | chr1:94348983-94394199    | glutamate-cysteine ligase modifier subunit                                | 2.759 | 3.118 |
| GCNT2    | chr6:10521567-10629601    | glucosaminyl (N-acetyl) transferase 2, I-branching enzyme (I blood group) | 0.419 | 0.168 |
| GCNT3    | chr15:59903868-59949737   | glucosaminyl (N-acetyl) transferase 3, mucin type                         | 1.016 | 0.176 |
| GDA      | chr9:47729510-74868453    | guanine deaminase                                                         | 0.748 | 0.211 |
| GDF11    | chr12:56137041-56211540   | growth differentiation factor 11                                          | 3.584 | 5.464 |
| GDF15    | chr19:18496967-18499986   | growth differentiation factor 15                                          | 8.279 | 16.48 |
| GD2      | chr10:5807185-5855512     | GDP dissociation inhibitor 2                                              | 0.667 | 0.471 |
| GDPD5    | chr1:175145684-75236938   | glycerophosphodiester phosphodiesterase domain containing 5               | 2.33  | 4.051 |
| GDPGP1   | chr15:90777486-90785312   | GDP-D-glucose phosphorylase 1                                             | 0.454 | 0.336 |
| GEM      | chr8:95261484-95274547    | GTP binding protein overexpressed in skeletal muscle                      | 2.731 | 4.78  |
| GFPT1    | chr2:69546900-69614386    | glutamine--fructose-6-phosphate transaminase 1                            | 1.635 | 2.223 |
| GFRA1    | chr10:117816434-118033126 | GDNF family receptor alpha 1                                              | 0.319 | 0.257 |
| GGN      | chr19:38874559-38880594   | gametogenetin                                                             | 1.621 | 2.457 |
| GGT8P    | chr2:91963332-91978189    | gamma-glutamyltransferase 8 pseudogene                                    | 0.185 | 0.095 |
| GHDC     | chr17:40341104-40346550   | GH3 domain containing                                                     | 0.604 | 0.407 |
| GHR      | chr5:42423496-42722173    | growth hormone receptor                                                   | 0.443 | 0.318 |
| GIMAP2   | chr7:150382793-150390728  | GTPase, IMAP family member 2                                              | 0.517 | 0.163 |
| GINS1    | chr20:25388322-25429191   | GINS complex subunit 1                                                    | 0.899 | 0.158 |
| GINS3    | chr16:58426297-58440048   | GINS complex subunit 3                                                    | 0.937 | 0.344 |
| GIPCC2   | chr1:78511225-78604178    | GIPC PDZ domain containing family member 2                                | 0.551 | 0.308 |
| GIT1     | chr17:27900486-27948441   | GIT ArfGAP 1                                                              | 1.925 | 4.68  |
| GJA3     | chr13:20712394-20735183   | gap junction protein alpha 3                                              | 3.234 | 4.518 |
| GJB1     | chrX:70430034-70948962    | gap junction protein beta 1                                               | 0.131 | 0.011 |
| GJB2     | chr13:20761603-20767114   | gap junction protein beta 2                                               | 0.551 | 0.214 |

|            |                           |                                                                         |       |       |
|------------|---------------------------|-------------------------------------------------------------------------|-------|-------|
| GJB5       | chr1:35220647-35224113    | gap junction protein beta 5                                             | 13.31 | 81.92 |
| GKAP1      | chr9:86354335-86432752    | G kinase anchoring protein 1                                            | 1.901 | 2.534 |
| GLDC       | chr9:6532463-6645692      | glycine decarboxylase                                                   | 0.435 | 0.172 |
| GLIPR1L1   | chr12:75728462-75784685   | GLI pathogenesis related 1 like 1                                       | 0.71  | 0.253 |
| GLIPR2     | chr9:36136741-36163903    | GLI pathogenesis related 2                                              | 2.404 | 4.163 |
| GLIS2      | chr16:4365852-4389659     | GLIS family zinc finger 2                                               | 1.307 | 3.086 |
| GLIS3      | chr9:3824127-4300046      | GLIS family zinc finger 3                                               | 2.815 | 5.064 |
| GLRX       | chr5:95149552-95158577    | glutaredoxin                                                            | 0.363 | 0.167 |
| GLS2       | chr12:56862300-56882181   | glutaminase 2                                                           | 0.314 | 0.182 |
| GLT25D1    | chr19:17666510-17693967   | collagen beta(1-O)galactosyltransferase 1                               | 1.725 | 2.344 |
| GLT25D2    | chr1:183904965-184006863  | collagen beta(1-O)galactosyltransferase 2                               | 1.448 | 2.079 |
| GLUD1      | chr10:88809958-88854776   | glutamate dehydrogenase 1                                               | 0.522 | 0.403 |
| GLUD2      | chrX:120181461-120183796  | glutamate dehydrogenase 2                                               | 0.384 | 0.115 |
| GLUL       | chr1:182350838-182361341  | glutamate-ammonia ligase                                                | 0.435 | 0.246 |
| GLYAT      | chr1:58466955-58499480    | glycine-N-acyltransferase                                               | 0.036 | 0.004 |
| GLYATL1    | chr1:58695101-58825925    | glycine-N-acyltransferase like 1                                        | 0.027 | 0.005 |
| GMPR2      | chr14:24701647-24708447   | guanosine monophosphate reductase 2                                     | 0.626 | 0.481 |
| GNA12      | chr7:2767740-2883959      | G protein subunit alpha 12                                              | 1.683 | 2.823 |
| GNAL       | chr18:11689013-11908865   | G protein subunit alpha L                                               | 0.605 | 0.439 |
| GNB2       | chr7:100271362-100276792  | G protein subunit beta 2                                                | 1.671 | 2.915 |
| GNG11      | chr7:93551015-93555826    | G protein subunit gamma 11                                              | 1.536 | 2.889 |
| GNMT       | chr6:42928499-42981719    | glycine N-methyltransferase                                             | 0.165 | 0.092 |
| GNPDA1     | chr5:141380233-141392620  | glucosamine-6-phosphate deaminase 1                                     | 1.37  | 2.233 |
| GNPDA2     | chr4:44703416-44728651    | glucosamine-6-phosphate deaminase 2                                     | 1.296 | 2.609 |
| GOLGA2P5   | chr12:100550158-100593392 | golgin A2 pseudogene 5                                                  | 0.323 | 0.246 |
| GOLT1A     | chr1:204167287-204183220  | golgi transport 1A                                                      | 0.447 | 0.181 |
| GORASP2    | chr2:171784947-171823643  | golgi reassembly stacking protein 2                                     | 1.394 | 2.03  |
| GPAM       | chr10:113909621-113975231 | glycerol-3-phosphate acyltransferase, mitochondrial                     | 0.155 | 0.155 |
| GPC1       | chr2:241374260-241407538  | glypican 1                                                              | 1.793 | 2.518 |
| GPC2       | chr7:99767000-99775004    | glypican 2                                                              | 2.424 | 3.491 |
| GPC5       | chr13:92050883-93519487   | glypican 5                                                              | 1.717 | 2.223 |
| GPCPD1     | chr20:5525018-5591672     | glycerophosphocholine phosphodiesterase 1                               | 1.148 | 2.23  |
| GPER       | chr7:1018659-1177893      | G protein-coupled estrogen receptor 1                                   | 0.237 | 0.202 |
| GPI        | chr19:34850684-34893318   | glucose-6-phosphate isomerase                                           | 0.592 | 0.427 |
| GPM6B      | chrX:13788040-13956831    | glycoprotein M6B                                                        | 0.493 | 0.402 |
| GPR1       | chr2:207040041-207082771  | G protein-coupled receptor 1                                            | 10.85 | 11.96 |
| GPR126     | chr6:142623036-142767403  | adhesion G protein-coupled receptor G6                                  | 0.637 | 0.33  |
| GPR133     | chr12:131438443-131626090 | adhesion G protein-coupled receptor D1                                  | 1.358 | 2.238 |
| GPR137C    | chr14:53019865-53104431   | G protein-coupled receptor 137C                                         | 2.95  | 2.979 |
| GPR157     | chr1:9610348-9252396      | G protein-coupled receptor 157                                          | 1.603 | 2.677 |
| GPR161     | chr1:168048779-168106905  | G protein-coupled receptor 161                                          | 2.856 | 4.256 |
| GPR56      | chr16:57653909-57689844   | adhesion G protein-coupled receptor G1                                  | 2.59  | 7.376 |
| GPR64      | chrX:19007382-19140755    | adhesion G protein-coupled receptor G2                                  | 2.296 | 2.615 |
| GPR87      | chr3:150804675-151176497  | G protein-coupled receptor 87                                           | 0.689 | 0.295 |
| GPR88      | chr1:101003727-101007583  | G protein-coupled receptor 88                                           | 0.267 | 0.145 |
| GPRC5C     | chr17:72427097-72448123   | G protein-coupled receptor class C group 5 member C                     | 0.661 | 0.437 |
| GPRIN1     | chr5:175953699-176037137  | G protein regulated inducer of neurite outgrowth 1                      | 3.579 | 6.06  |
| GPSM1      | chr9:139221931-139254057  | G-protein signaling modulator 1                                         | 2.452 | 2.874 |
| GPX2       | chr14:65381078-65569413   | glutathione peroxidase 2                                                | 0.107 | 0.01  |
| GRAMD1B    | chr1:123301319-123498481  | GRAM domain containing 1B                                               | 0.313 | 0.263 |
| GRAMD1C    | chr3:113557680-113666341  | GRAM domain containing 1C                                               | 0.47  | 0.293 |
| GRAMD3     | chr5:125695787-125830209  | GRAM domain containing 3                                                | 0.374 | 0.084 |
| GRB10      | chr7:50657759-50861181    | growth factor receptor bound protein 10                                 | 2.076 | 3.777 |
| GRB7       | chr17:37894108-37903539   | growth factor receptor bound protein 7                                  | 0.321 | 0.159 |
| GRHL1      | chr2:10091791-10142412    | grainyhead like transcription factor 1                                  | 1.932 | 2.767 |
| GRHPR      | chr9:37422459-37472483    | glyoxylate reductase/hydroxyypyruvate reductase                         | 0.467 | 0.329 |
| GRIA3      | chrX:122318095-122624766  | glutamate ionotropic receptor AMPA type subunit 3                       | 0.58  | 0.335 |
| GRK5       | chr10:120967196-121215131 | G protein-coupled receptor kinase 5                                     | 1.411 | 2.237 |
| GRK6       | chr5:176853494-176883287  | G protein-coupled receptor kinase 6                                     | 1.86  | 2.213 |
| GRTP1      | chr13:113978211-114018463 | growth hormone regulated TBC protein 1                                  | 0.279 | 0.173 |
| GSN        | chr9:124030379-124095123  | gelsolin                                                                | 0.23  | 0.112 |
| GSTA4      | chr6:52842745-52860178    | glutathione S-transferase alpha 4                                       | 0.652 | 0.373 |
| GSTK1      | chr7:142960521-142966222  | glutathione S-transferase kappa 1                                       | 0.555 | 0.336 |
| GSTM1      | chr1:110198697-110236367  | Glutathione S-Transferase Mu 1                                          | 0.322 | 0.140 |
| GSTO1      | chr10:106013951-106027222 | glutathione S-transferase omega 1                                       | 0.328 | 0.126 |
| GTF2A1     | chr14:81641795-81689666   | general transcription factor IIA subunit 1                              | 1.628 | 2.169 |
| GTF2I      | chr7:74072029-74175022    | general transcription factor Iii                                        | 0.577 | 0.317 |
| GTF2IRD1   | chr7:73867515-74016928    | GTF2I repeat domain containing 1                                        | 2.345 | 2.988 |
| GTF2IRD1P1 | chr7:66117918-66309846    | GTF2I repeat domain containing 1 pseudogene 1                           | 1.554 | 2.291 |
| GTF3C6     | chr6:111279762-111289091  | general transcription factor IIIC subunit 6                             | 0.545 | 0.313 |
| GTPBP2     | chr6:43543877-43596936    | GTP binding protein 2                                                   | 3.709 | 5.829 |
| GTSF1      | chr22:46690546-46729084   | G2 and S-phase expressed 1                                              | 0.384 | 0.391 |
| GYG2       | chrX:2746793-2801206      | glycogenin 2                                                            | 0.141 | 0.01  |
| GYPC       | chr2:127413444-127454251  | glycophorin C (Gerbich blood group)                                     | 1.578 | 2.516 |
| GYS2       | chr12:21689122-21757865   | glycogen synthase 2                                                     | 0.118 | 0.041 |
| H1FO       | chr22:38201113-38203443   | H1 histone family member 0                                              | 1.689 | 2.029 |
| H1FX       | chr3:129033613-129043412  | H1 histone family member X                                              | 1.667 | 2.345 |
| H2AFJ      | chr12:14927269-14930936   | H2A histone family member J                                             | 1.529 | 2.335 |
| H2AFY2     | chr10:71812356-71930285   | H2A histone family member Y2                                            | 0.67  | 0.321 |
| H2AFZ      | chr4:100869243-100871512  | H2A histone family member Z                                             | 1.781 | 2.349 |
| H6PD       | chr1:9293675-9331428      | hexose-6-phosphate dehydrogenase/glucose 1-dehydrogenase                | 0.643 | 0.448 |
| HAAO       | chr2:42989628-43030907    | 3-hydroxyanthranilate 3,4-dioxygenase                                   | 0.552 | 0.133 |
| HABP2      | chr10:115310589-115423829 | hyaluronan binding protein 2                                            | 0.285 | 0.044 |
| HABP4      | chr9:99192128-99259567    | hyaluronan binding protein 4                                            | 1.983 | 2.824 |
| HADH       | chr4:108910869-108956331  | hydroxyacyl-CoA dehydrogenase                                           | 0.769 | 0.425 |
| HAL        | chr2:96366439-96390143    | histidine ammonia-lyase                                                 | 0.262 | 0.091 |
| HAMP       | chr19:35773409-35776045   | hepcidin antimicrobial peptide                                          | 0.669 | 0.075 |
| HAO1       | chr20:7826328-7921179     | hydroxyacid oxidase 1                                                   | 0.116 | 0.01  |
| HAO2       | chr1:119904920-119936755  | hydroxyacid oxidase 2                                                   | 0.026 | 0.008 |
| HAP1       | chr17:39873997-39890898   | huntingtin-associated protein 1                                         | 5.634 | 16.73 |
| HBEGF      | chr5:139712427-139726188  | heparin binding EGF like growth factor                                  | 4.853 | 8.747 |
| HCFC1R1    | chr16:3072625-3077756     | host cell factor C1 regulator 1                                         | 2.339 | 3.004 |
| HCFC2      | chr12:104458235-104504663 | host cell factor C2                                                     | 0.655 | 0.267 |
| HCG9       | chr6:29914520-29946177    | HLA complex group 9 (non-protein coding)                                | 2.537 | 3.597 |
| HCN4       | chr5:73612199-73661605    | hyperpolarization activated cyclic nucleotide gated potassium channel 4 | 13.02 | 20.23 |
| HDAC11     | chr3:13521714-13547924    | histone deacetylase 11                                                  | 1.305 | 2.052 |
| HDAC9      | chr7:18126571-19161426    | histone deacetylase 9                                                   | 3.456 | 2.393 |
| HDGF       | chr1:156711898-156737161  | hepatoma-derived growth factor                                          | 0.461 | 0.276 |
| HDHD3      | chr9:116136696-116139264  | haloacid dehalogenase like hydrolase domain containing 3                | 0.557 | 0.393 |
| HDX        | chrX:83572881-83757487    | highly divergent homeobox                                               | 2.824 | 3.681 |
| HEATR3     | chr16:50099879-50140332   | HEAT repeat containing 3                                                | 0.571 | 0.271 |
| HECA       | chr6:139456248-139501946  | hdc homolog, cell cycle regulator                                       | 1.8   | 2.463 |
| HELZ       | chr17:85056517-85241799   | helicase with zinc finger                                               | 0.653 | 0.467 |



|           |                           |                                                                |       |       |
|-----------|---------------------------|----------------------------------------------------------------|-------|-------|
| HERC5     | chr4:89378199-89427321    | HECT and RLD domain containing E3 ubiquitin protein ligase 5   | 1.869 | 2.231 |
| HES4      | chr1:934230-944881        | hes family bHLH transcription factor 4                         | 1.166 | 2.491 |
| HES6      | chr2:239146907-239148681  | hes family bHLH transcription factor 6                         | 2.609 | 5.523 |
| HES7      | chr17:8023907-8027639     | hes family bHLH transcription factor 7                         | 2.048 | 3.664 |
| HEXIM2    | chr17:43236391-43247696   | hexamethylene bisacetamide inducible 2                         | 0.464 | 0.204 |
| HEY2      | chr6:126070731-126082415  | hes related family bHLH transcription factor with YRPW motif 2 | 2.576 | 3.446 |
| HFE       | chr6:26086547-26098258    | hemochromatosis                                                | 0.382 | 0.333 |
| HFE2      | chr1:145413122-145417545  | hemochromatosis type 2 (juvenile)                              | 0.09  | 0.006 |
| HGD       | chr3:120347014-120401418  | homogentisate 1,2-dioxygenase                                  | 0.41  | 0.047 |
| HHLA3     | chr1:70820492-70833705    | HERV-H LTR-associating 3                                       | 1.387 | 2.032 |
| HIBCH     | chr2:191069351-191236391  | 3-hydroxyisobutyryl-CoA hydrolase                              | 0.499 | 0.204 |
| HIC2      | chr22:21771649-21805750   | hypermethylated in cancer 2                                    | 1.303 | 2.143 |
| HILPDA    | chr7:128095883-128104700  | hypoxia inducible lipid droplet associated                     | 1.665 | 2.014 |
| HIST1H1T  | chr6:26105991-26109945    | histone cluster 1, H1t                                         | 4.383 | 4.959 |
| HIST1H2AD | chr6:26146343-26199521    | histone cluster 1, H2ad                                        | 5.757 | 7.155 |
| HIST1H2AE | chr6:26217147-26217711    | histone cluster 1, H2ae                                        | 3.347 | 3.454 |
| HIST1H2AG | chr6:27100816-27114637    | histone cluster 1, H2ag                                        | 3.646 | 4.732 |
| HIST1H2AI | chr6:27775844-27780258    | histone cluster 1, H2ai                                        | 3.521 | 2.659 |
| HIST1H2AK | chr6:27801740-27824183    | histone cluster 1, H2ak                                        | 1.938 | 3.457 |
| HIST1H2BC | chr6:26112743-26140256    | histone cluster 1, H2bc                                        | 3.594 | 3.645 |
| HIST1H2BE | chr6:26146343-26199521    | histone cluster 1, H2be                                        | 2.148 | 4.247 |
| HIST1H2BG | chr6:26214352-26217023    | histone cluster 1, H2bg                                        | 5.592 | 5.663 |
| HIST1H2BJ | chr6:27090228-27100616    | histone cluster 1, H2bj                                        | 1.578 | 2.781 |
| HIST1H2BN | chr6:27801740-27824183    | histone cluster 1, H2bn                                        | 3.717 | 7.199 |
| HIST1H2BO | chr6:27861202-27926219    | histone cluster 1, H2bo                                        | 1.345 | 3.378 |
| HIST1H4C  | chr6:26102081-26105297    | histone cluster 1, H4c                                         | 2.972 | 5.165 |
| HIST1H4D  | chr6:26146343-26199521    | histone cluster 1, H4d                                         | 4.784 | 5.248 |
| HIST1H4E  | chr6:26204728-26210036    | histone cluster 1, H4e                                         | 3.334 | 3.227 |
| HIST1H4H  | chr6:26280826-26285745    | histone cluster 1, H4h                                         | 2.625 | 3.23  |
| HIST1H4I  | chr6:27100816-27114637    | histone cluster 1, H4i                                         | 3.084 | 5.982 |
| HIST1H4J  | chr6:27791628-27800624    | histone cluster 1, H4j                                         | 3.952 | 4.036 |
| HIST1H4K  | chr6:27791628-27800624    | histone cluster 1, H4k                                         | 2.957 | 4.227 |
| HIST2H2AC | chr1:149858524-149858961  | histone cluster 2, H2ac                                        | 1.706 | 2.768 |
| HIST2H2BC | chr1:149814992-149823161  | histone cluster 2, H2bc (pseudogene)                           | 2.026 | 3.803 |
| HIST2H2BE | chr1:149856009-149858232  | histone cluster 2, H2be                                        | 1.729 | 2.451 |
| HIVFP2    | chr6:143072603-143267446  | human immunodeficiency virus type I enhancer binding protein 2 | 1.627 | 2.501 |
| HJURP     | chr2:234745426-234763212  | Holliday junction recognition protein                          | 0.319 | 0.142 |
| HKDC1     | chr10:70980058-71027315   | hexokinase domain containing 1                                 | 0.853 | 0.336 |
| HLA-DRA   | chr6:32407618-32412826    | major histocompatibility complex, class II, DR alpha           | 0.755 | 0.44  |
| HLA-DRB1  | chr6:32485153-32557613    | major histocompatibility complex, class II, DR beta 1          | 0.607 | 0.259 |
| HM13      | chr20:30102240-30161066   | histocompatibility (minor) 13                                  | 1.859 | 2.81  |
| HMG1      | chr6:34204576-34214008    | high mobility group AT-hook 1                                  | 4.556 | 8.912 |
| HMG2      | chr12:66151799-66360071   | high mobility group AT-hook 2                                  | 1.456 | 2.133 |
| HMGCR     | chr5:74632328-74657926    | 3-hydroxy-3-methylglutaryl-CoA reductase                       | 0.564 | 0.425 |
| HMGCS1    | chr5:43287571-43313658    | 3-hydroxy-3-methylglutaryl-CoA synthase 1                      | 0.251 | 0.176 |
| HMGCS2    | chr1:120290618-120311555  | 3-hydroxy-3-methylglutaryl-CoA synthase 2                      | 0.106 | 0.014 |
| HMGN3     | chr6:79910929-79946517    | high mobility group nucleosomal binding domain 3               | 0.531 | 0.36  |
| HMMR      | chr5:162887516-162918953  | hyaluronan mediated motility receptor                          | 0.219 | 0.22  |
| HMOX1     | chr22:35777059-35790207   | heme oxygenase 1                                               | 1.545 | 2.585 |
| HN1       | chr17:73131343-73150775   | hematological and neurological expressed 1                     | 1.981 | 2.057 |
| HNF1A     | chr12:121415244-121454300 | HNF1 homeobox A                                                | 0.298 | 0.07  |
| HNF4A     | chr20:42984440-43061485   | hepatocyte nuclear factor 4 alpha                              | 0.146 | 0.02  |
| HNF4G     | chr8:76319764-76479061    | hepatocyte nuclear factor 4 gamma                              | 0.826 | 0.404 |
| HNMT      | chr2:138721807-138773934  | histamine N-methyltransferase                                  | 0.224 | 0.059 |
| HNRNPA1   | chr12:54674461-54680871   | heterogeneous nuclear ribonucleoprotein A1                     | 0.533 | 0.333 |
| HNRNPD    | chr4:83273759-83295202    | heterogeneous nuclear ribonucleoprotein D                      | 0.6   | 0.398 |
| HOMER1    | chr5:78654651-78809700    | homer scaffolding protein 1                                    | 2.819 | 4.666 |
| HOMER3    | chr19:19040009-19052041   | homer scaffolding protein 3                                    | 2.715 | 4.899 |
| HOOK1     | chr1:60280532-60342050    | hook microtubule-tethering protein 1                           | 0.738 | 0.341 |
| HOXA3     | chr7:27145808-27170399    | homeobox A3                                                    | 0.26  | 0.05  |
| HOXB13    | chr17:46802126-46806111   | homeobox B13                                                   | 0.598 | 0.305 |
| HPD       | chr12:122277432-122326517 | 4-hydroxyphenylpyruvate dioxygenase                            | 0.278 | 0.066 |
| HPGD      | chr4:175411122-175444086  | hydroxyprostaglandin dehydrogenase 15-(NAD)                    | 0.621 | 0.093 |
| HPX       | chr11:6452267-6462254     | hemopexin                                                      | 0.872 | 0.196 |
| HRCT1     | chr9:35906086-35907847    | histidine rich carboxyl terminus 1                             | 0.472 | 0.138 |
| HRG       | chr3:186383797-186396023  | histidine rich glycoprotein                                    | 0.535 | 0.119 |
| HRH1      | chr3:11178778-11305146    | histamine receptor H1                                          | 1.769 | 2.17  |
| HRSP12    | chr8:99114566-99129418    | reactive intermediate imine deaminase A homolog                | 0.474 | 0.147 |
| HS6ST1    | chr2:129023047-129076171  | heparan sulfate 6-O-sulfotransferase 1                         | 1.814 | 2.7   |
| HSBP1L1   | chr18:77724581-77793936   | heat shock factor binding protein 1-like 1                     | 0.352 | 0.143 |
| HSD11B1   | chr1:209859524-209908429  | hydroxysteroid (11-beta) dehydrogenase 1                       | 0.49  | 0.25  |
| HSD11B1L  | chr19:5678430-5688534     | hydroxysteroid (11-beta) dehydrogenase 1-like                  | 2.144 | 2.697 |
| HSD11B2   | chr16:67463721-67471806   | hydroxysteroid (11-beta) dehydrogenase 2                       | 0.451 | 0.28  |
| HSD17B11  | chr4:88257690-88312455    | hydroxysteroid (17-beta) dehydrogenase 11                      | 0.425 | 0.144 |
| HSD17B2   | chr16:82068857-82132139   | hydroxysteroid (17-beta) dehydrogenase 2                       | 0.118 | 0.012 |
| HSD17B3   | chr9:98997588-99145992    | hydroxysteroid (17-beta) dehydrogenase 3                       | 0.689 | 0.403 |
| HSD17B4   | chr5:118748685-118878030  | hydroxysteroid (17-beta) dehydrogenase 4                       | 0.445 | 0.174 |
| HSD17B6   | chr12:57157095-57181574   | hydroxysteroid (17-beta) dehydrogenase 6                       | 0.48  | 0.148 |
| HSD17B7   | chr1:162760495-162782608  | hydroxysteroid (17-beta) dehydrogenase 7                       | 0.319 | 0.358 |
| HSD17B7P2 | chr10:38645307-38667511   | hydroxysteroid (17-beta) dehydrogenase 7 pseudogene 2          | 0.271 | 0.222 |
| HSD17B8   | chr6:33172413-33174608    | hydroxysteroid (17-beta) dehydrogenase 8                       | 0.497 | 0.324 |
| HSDL1     | chr16:84155743-84178800   | hydroxysteroid dehydrogenase like 1                            | 2.042 | 3.185 |
| HSPA12A   | chr10:118430702-118502085 | heat shock protein family A (Hsp70) member 12A                 | 2.373 | 3.445 |
| HSPA13    | chr21:15743436-15755509   | heat shock protein family A (Hsp70) member 13                  | 3.547 | 6.907 |
| HSPA5     | chr9:127997126-128003666  | heat shock protein family A (Hsp70) member 5                   | 1.538 | 2.7   |
| HSPA8     | chr11:122928199-122932901 | heat shock protein family A (Hsp70) member 8                   | 0.574 | 0.216 |
| HSPB1     | chr7:75924225-75933614    | heat shock protein family B (small) member 1                   | 0.556 | 0.438 |
| HSPB2     | chr11:111783459-111797595 | heat shock protein family B (small) member 2                   | 0.397 | 0.036 |
| HSPB6     | chr19:36239261-36248616   | heat shock protein family B (small) member 6                   | 2.575 | 4.71  |
| HSPB8     | chr12:119616594-119632551 | heat shock protein family B (small) member 8                   | 0.923 | 0.458 |
| HSPF1     | chr2:198351303-198418423  | heat shock protein family E (Hsp10) member 1                   | 0.534 | 0.339 |
| HSPG2     | chr1:22138757-22263778    | heparan sulfate proteoglycan 2                                 | 1.409 | 2.161 |
| HTR7P1    | chr12:13080639-13236383   | 5-hydroxytryptamine receptor 7 pseudogene 1                    | 1.643 | 2.247 |
| HULC      | chr6:8435855-8789203      | hepatocellular carcinomas up-regulated long non-coding RNA     | 0.077 | 0.032 |
| HYAL1     | chr3:50337319-50349812    | hyaluronoglucosaminidase 1                                     | 0.318 | 0.173 |
| HYOU1     | chr11:118914895-118927927 | hypoxia up-regulated 1                                         | 1.99  | 2.884 |
| IARS      | chr9:94972489-95056038    | isoleucyl-tRNA synthetase                                      | 1.875 | 2.206 |
| IARS2     | chr1:220046618-220321383  | isoleucyl-tRNA synthetase 2, mitochondrial                     | 0.708 | 0.478 |
| ICA1      | chr7:8152814-8302242      | islet cell autoantigen 1                                       | 0.906 | 0.485 |
| ICOSLG    | chr21:45642608-45660888   | inducible T-cell co-stimulator ligand                          | 3.632 | 13.42 |
| ID2       | chr2:8822112-8824583      | inhibitor of DNA binding 2, HLH protein                        | 0.439 | 0.229 |
| IDH1      | chr2:209100952-209119806  | isocitrate dehydrogenase (NADP+), cytosolic                    | 0.51  | 0.418 |
| IDH3B     | chr20:2639040-2644865     | isocitrate dehydrogenase 3 (NADP+) beta                        | 0.642 | 0.43  |

|                 |                           |                                                                               |       |       |
|-----------------|---------------------------|-------------------------------------------------------------------------------|-------|-------|
| <i>IDI1</i>     | chr10:1064846-1178548     | isopentenyl-diphosphate delta isomerase 1                                     | 0.574 | 0.291 |
| <i>IER2</i>     | chr19:13261266-13265720   | immediate early response 2                                                    | 1.88  | 2.185 |
| <i>IER3</i>     | chr6:30710975-30712327    | immediate early response 3                                                    | 3.08  | 4.538 |
| <i>IFFO2</i>    | chr1:19230773-19283187    | intermediate filament family orphan 2                                         | 1.968 | 2.766 |
| <i>IFI27</i>    | chr14:94571201-94583033   | interferon alpha inducible protein 27                                         | 0.572 | 0.38  |
| <i>IFI44</i>    | chr1:79115286-79129877    | interferon induced protein 44                                                 | 0.611 | 0.295 |
| <i>FIT1</i>     | chr10:91152302-91168626   | interferon induced protein with tetratricopeptide repeats 1                   | 0.302 | 0.244 |
| <i>IFIT2</i>    | chr10:91061705-91069033   | interferon induced protein with tetratricopeptide repeats 2                   | 0.643 | 0.442 |
| <i>IFITM2</i>   | chr1:1309531-311834       | interferon induced transmembrane protein 2                                    | 0.353 | 0.081 |
| <i>IFITM3</i>   | chr1:1319672-320914       | interferon induced transmembrane protein 3                                    | 0.385 | 0.306 |
| <i>IFNE</i>     | chr9:21454134-21559820    | interferon, epsilon                                                           | 2.512 | 5.231 |
| <i>IFRD1</i>    | chr7:112063198-112130943  | interferon related developmental regulator 1                                  | 2.876 | 4.948 |
| <i>IFT27</i>    | chr22:37154245-37172292   | intraflagellar transport 27                                                   | 0.623 | 0.414 |
| <i>IGFBP1</i>   | chr7:45927958-45933267    | insulin like growth factor binding protein 1                                  | 2.562 | 2.18  |
| <i>IGFBP3</i>   | chr7:45951843-45960871    | insulin like growth factor binding protein 3                                  | 5.6   | 12.48 |
| <i>IGFBP7</i>   | chr4:57843827-58071465    | insulin like growth factor binding protein 7                                  | 1.405 | 2.741 |
| <i>IKBKE</i>    | chr1:206643585-206670223  | inhibitor of kappa light polypeptide gene enhancer in B-cells, kinase epsilon | 0.163 | 0.046 |
| <i>IL15</i>     | chr4:142557748-142656251  | interleukin 15                                                                | 1.42  | 2.327 |
| <i>IL15RA</i>   | chr10:5994333-6021549     | interleukin 15 receptor subunit alpha                                         | 1.732 | 2.52  |
| <i>IL17RE</i>   | chr3:9906149-10149915     | interleukin 17 receptor E                                                     | 0.351 | 0.226 |
| <i>IL18</i>     | chr1:112013932-112034840  | interleukin 18                                                                | 1.761 | 2.193 |
| <i>IL1B</i>     | chr2:113587336-113594356  | interleukin 1 beta                                                            | 2.382 | 2.826 |
| <i>IL1R2</i>    | chr2:102608305-102644884  | interleukin 1 receptor type 2                                                 | 0.163 | 0.051 |
| <i>IL1RAP</i>   | chr3:190231839-190374986  | interleukin 1 receptor accessory protein                                      | 1.611 | 2.635 |
| <i>IL22RA1</i>  | chr1:24446190-24469775    | interleukin 22 receptor subunit alpha 1                                       | 0.381 | 0.065 |
| <i>IL31RA</i>   | chr5:55147203-55218789    | interleukin 31 receptor A                                                     | 2.698 | 3.791 |
| <i>IL32</i>     | chr16:3096602-3125579     | interleukin 32                                                                | 0.449 | 0.107 |
| <i>IL6</i>      | chr7:22766765-22771621    | interleukin 6                                                                 | 4.421 | 7.618 |
| <i>IL6R</i>     | chr1:154377668-154441926  | interleukin 6 receptor                                                        | 0.684 | 0.418 |
| <i>IL8</i>      | chr4:74606222-74609433    | C-X-C motif chemokine ligand 8                                                | 0.536 | 0.323 |
| <i>IMPDH1</i>   | chr7:128032330-128090404  | IIMP (inosine 5'-monophosphate) dehydrogenase 1                               | 2.383 | 3.781 |
| <i>INADL</i>    | chr1:62207703-62629591    | PATJ, crumbs cell polarity complex component                                  | 0.68  | 0.32  |
| <i>INE2</i>     | chrX:15845440-15805927    | inactivation escape 2 (non-protein coding)                                    | 1.32  | 2.277 |
| <i>INHBB</i>    | chr2:121103718-121109383  | inhibin beta B                                                                | 1.804 | 2.194 |
| <i>INPP4A</i>   | chr2:99061320-99207496    | inositol polyphosphate-4-phosphatase type I A                                 | 1.532 | 2.109 |
| <i>INSIG1</i>   | chr7:155089485-155101947  | insulin induced gene 1                                                        | 0.374 | 0.258 |
| <i>INSR</i>     | chr19:7112265-7294331     | insulin receptor                                                              | 0.615 | 0.395 |
| <i>INTS1</i>    | chr7:1468098-1544081      | integrator complex subunit 1                                                  | 1.439 | 2.102 |
| <i>IPO8</i>     | chr12:30781914-30848997   | importin 8                                                                    | 0.592 | 0.326 |
| <i>IQCB1</i>    | chr3:121488425-121553926  | IQ motif containing B1                                                        | 1.588 | 2.22  |
| <i>IQCD</i>     | chr12:113623394-113658882 | IQ motif containing D                                                         | 3.15  | 4.082 |
| <i>IQGAP2</i>   | chr5:75699105-76003957    | IQ motif containing GTPase activating protein 2                               | 0.275 | 0.027 |
| <i>IQGAP3</i>   | chr1:156495196-156542396  | IQ motif containing GTPase activating protein 3                               | 0.467 | 0.306 |
| <i>IRAK2</i>    | chr3:10206554-10285430    | interleukin 1 receptor associated kinase 2                                    | 2.076 | 3.214 |
| <i>IRF6</i>     | chr1:209958856-209979520  | interferon regulatory factor 6                                                | 0.175 | 0.064 |
| <i>IRF7</i>     | chr1:572809-640705        | interferon regulatory factor 7                                                | 2.077 | 2.692 |
| <i>IRF8</i>     | chr16:85932773-85956211   | interferon regulatory factor 8                                                | 2.597 | 3.314 |
| <i>IRS2</i>     | chr13:110406181-110442998 | insulin receptor substrate 2                                                  | 2.009 | 3.321 |
| <i>ISOC2</i>    | chr19:55964345-55973049   | isochorismatase domain containing 2                                           | 0.38  | 0.329 |
| <i>ITFG1</i>    | chr16:47189273-47735440   | integrin alpha FG-GAP repeat containing 1                                     | 0.686 | 0.494 |
| <i>ITFG3</i>    | chr16:284796-316119       | family with sequence similarity 234 member A                                  | 1.535 | 2.067 |
| <i>ITGA11</i>   | chr15:68588494-68724546   | integrin subunit alpha 11                                                     | 3.758 | 6.512 |
| <i>ITGA2</i>    | chr5:52285122-52391113    | integrin subunit alpha 2                                                      | 3.135 | 6.21  |
| <i>ITGA3</i>    | chr17:48133339-48167950   | integrin subunit alpha 3                                                      | 2.627 | 4.191 |
| <i>ITGA6</i>    | chr2:173292313-173371181  | integrin subunit alpha 6                                                      | 1.825 | 2.398 |
| <i>ITGAM</i>    | chr16:31265166-31344213   | integrin subunit alpha M                                                      | 0.311 | 0.087 |
| <i>ITGB3</i>    | chr17:45329813-45399861   | integrin subunit beta 3                                                       | 4.832 | 8.484 |
| <i>ITIH1</i>    | chr3:52811601-52826084    | inter-alpha-trypsin inhibitor heavy chain 1                                   | 0.722 | 0.227 |
| <i>ITIH2</i>    | chr10:7745197-7791483     | inter-alpha-trypsin inhibitor heavy chain 2                                   | 0.533 | 0.092 |
| <i>ITIH4</i>    | chr3:52847005-52931597    | inter-alpha-trypsin inhibitor heavy chain family member 4                     | 0.643 | 0.195 |
| <i>ITPA</i>     | chr20:3189312-3204516     | inosine triphosphatase                                                        | 0.611 | 0.446 |
| <i>ITPKA</i>    | chr15:41785389-41795757   | inositol-triphosphate 3-kinase A                                              | 2.428 | 3.087 |
| <i>ITPR1</i>    | chr3:4535031-4889524      | inositol 1,4,5-trisphosphate receptor type 1                                  | 1.972 | 2.639 |
| <i>ITPRIP</i>   | chr10:106069453-106098251 | inositol 1,4,5-trisphosphate receptor interacting protein                     | 3.434 | 8.664 |
| <i>IYD</i>      | chr6:150690027-150725765  | iodotyrosine deiodinase                                                       | 0.306 | 0.06  |
| <i>JAG1</i>     | chr20:10618206-10654694   | jagged 1                                                                      | 3.266 | 4.864 |
| <i>JARID2</i>   | chr6:15245750-15522273    | jumonji and AT-rich interaction domain containing 2                           | 1.612 | 2.668 |
| <i>JDP2</i>     | chr14:75894508-75939423   | Jun dimerization protein 2                                                    | 2.834 | 4.635 |
| <i>JHDM1D</i>   | chr7:139784545-139876767  | lysine demethylase 7A                                                         | 1.535 | 2.342 |
| <i>JKAMP</i>    | chr14:59919111-60043549   | JNK1/MAPK8-associated membrane protein                                        | 0.707 | 0.439 |
| <i>JOSD1</i>    | chr22:39081547-39097357   | Josephin domain containing 1                                                  | 1.982 | 2.793 |
| <i>JPH1</i>     | chr8:75146938-75233676    | junctophilin 1                                                                | 3.25  | 5.047 |
| <i>JUN</i>      | chr1:59246459-59249943    | jun proto-oncogene                                                            | 2.77  | 2.946 |
| <i>JUND</i>     | chr19:18390562-18392432   | jun D proto-oncogene                                                          | 2.656 | 3.384 |
| <i>KANK1</i>    | chr9:470293-746106        | KN motif and ankyrin repeat domains 1                                         | 0.303 | 0.136 |
| <i>KANSL3</i>   | chr2:97258891-97304116    | KAT8 regulatory NSL complex subunit 3                                         | 1.588 | 2.041 |
| <i>KBTBD4</i>   | chr1:147487488-47606116   | kelch repeat and BTB domain containing 4                                      | 0.735 | 0.484 |
| <i>KBTBD7</i>   | chr13:41759055-41768779   | kelch repeat and BTB domain containing 7                                      | 0.469 | 0.228 |
| <i>KC6</i>      | chr18:38958108-39144845   | keratoconus gene 6                                                            | 0.47  | 0.25  |
| <i>KCNK3</i>    | chr19:50815529-50832634   | potassium voltage-gated channel subfamily C member 3                          | 2.248 | 4.128 |
| <i>KCNH7</i>    | chr2:163175541-163695264  | potassium voltage-gated channel subfamily H member 7                          | 0.669 | 0.159 |
| <i>KCNH8</i>    | chr3:19007783-19577752    | potassium voltage-gated channel subfamily H member 8                          | 0.675 | 0.47  |
| <i>KCNJ16</i>   | chr17:68071320-68131746   | potassium voltage-gated channel subfamily J member 16                         | 0.138 | 0.005 |
| <i>KCNJ8</i>    | chr12:21917888-21928014   | potassium voltage-gated channel subfamily J member 8                          | 0.463 | 0.119 |
| <i>KCNK13</i>   | chr14:90527003-90652195   | potassium two pore domain channel subfamily K member 13                       | 2.128 | 3.934 |
| <i>KCNK5</i>    | chr6:39151668-39197259    | potassium two pore domain channel subfamily K member 5                        | 0.145 | 0.094 |
| <i>KCNMB4</i>   | chr12:70760061-70828072   | potassium calcium-activated channel subfamily M regulatory beta subunit 4     | 0.504 | 0.356 |
| <i>KCNQ5</i>    | chr6:73331570-73908573    | potassium voltage-gated channel subfamily Q member 5                          | 2.746 | 3.433 |
| <i>KCTD14</i>   | chr1:177726760-77850699   | potassium channel tetramerization domain containing 14                        | 0.623 | 0.401 |
| <i>KCTD17</i>   | chr22:37447778-37505731   | potassium channel tetramerization domain containing 17                        | 1.93  | 2.386 |
| <i>KCTD3</i>    | chr1:215740507-215795151  | potassium channel tetramerization domain containing 3                         | 0.646 | 0.384 |
| <i>KCTD8</i>    | chr4:44175919-44450824    | potassium channel tetramerization domain containing 8                         | 1.517 | 2.275 |
| <i>KDEL3</i>    | chr22:38864082-38902373   | KDEL endoplasmic reticulum protein retention receptor 3                       | 0.574 | 0.37  |
| <i>KDM2B</i>    | chr12:121865890-122019034 | lysine demethylase 2B                                                         | 1.705 | 2.43  |
| <i>KDM8</i>     | chr16:27214806-27233118   | lysine demethylase 8                                                          | 0.449 | 0.271 |
| <i>KDR</i>      | chr4:55944425-55992383    | kinase insert domain receptor                                                 | 0.148 | 0.132 |
| <i>KGFLP1</i>   | chr9:46687556-46746820    | fibroblast growth factor 7 pseudogene                                         | 1.452 | 2.158 |
| <i>KHDRBS3</i>  | chr8:136469658-136668646  | KH domain containing, RNA binding, signal transduction associated 3           | 2.641 | 4.216 |
| <i>KHK</i>      | chr2:27309610-27341995    | ketoheokinase                                                                 | 0.285 | 0.127 |
| <i>KIAA0040</i> | chr1:175126122-175162229  | KIAA0040                                                                      | 0.475 | 0.491 |
| <i>KIAA0146</i> | chr8:48173488-48650726    | scaffolding protein involved in DNA repair                                    | 1.425 | 2.221 |
| <i>KIAA0195</i> | chr17:73452663-73511627   | transmembrane protein 94                                                      | 0.516 | 0.267 |
| <i>KIAA0226</i> | chr3:197398258-197511317  | RUN and cysteine rich domain containing beclin 1 interacting protein          | 1.976 | 2.792 |

|           |                           |                                                                     |       |       |
|-----------|---------------------------|---------------------------------------------------------------------|-------|-------|
| KIAA0247  | chr14:70078309-70181861   | sushi domain containing 6                                           | 1.18  | 2.527 |
| KIAA0355  | chr19:34745455-34846471   | KIAA0355                                                            | 1.537 | 2.003 |
| KIAA0391  | chr14:35554303-35747687   | KIAA0391                                                            | 0.556 | 0.338 |
| KIAA0513  | chr16:85061409-85127834   | KIAA0513                                                            | 1.903 | 2.344 |
| KIAA0556  | chr16:27561407-27791692   | KIAA0556                                                            | 1.579 | 2.455 |
| KIAA0930  | chr22:45588122-45636650   | KIAA0930                                                            | 1.7   | 2.39  |
| KIAA1147  | chr7:141251077-141401953  | KIAA1147                                                            | 0.567 | 0.242 |
| KIAA1199  | chr15:81071711-81282227   | cell migration inducing hyaluronan binding protein                  | 0.986 | 2.361 |
| KIAA1211L | chr2:99410308-99552684    | KIAA1211-like                                                       | 3.899 | 3.605 |
| KIAA1407  | chr3:113682983-113775460  | coiled-coil domain containing 191                                   | 0.743 | 0.488 |
| KIAA1456  | chr8:12803182-12887507    | KIAA1456                                                            | 0.361 | 0.347 |
| KIAA1468  | chr18:59854500-59974428   | KIAA1468                                                            | 0.608 | 0.35  |
| KIAA1522  | chr1:33207404-33240833    | KIAA1522                                                            | 0.629 | 0.32  |
| KIAA1524  | chr3:108268391-108413693  | KIAA1524                                                            | 0.963 | 0.367 |
| KIAA1683  | chr19:18367905-18385319   | KIAA1683                                                            | 1.309 | 3.046 |
| KIAA2018  | chr3:113367232-113415493  | upstream transcription factor family member 3                       | 0.653 | 0.365 |
| KIF18B    | chr17:43002078-43025101   | kinesin family member 18B                                           | 0.491 | 0.274 |
| KIF20A    | chr5:137475458-137549032  | kinesin family member 20A                                           | 0.24  | 0.248 |
| KIF21B    | chr1:200938513-200992828  | kinesin family member 21B                                           | 4.613 | 7.153 |
| KIF23     | chr15:69706596-69740764   | kinesin family member 23                                            | 0.567 | 0.443 |
| KIF2C     | chr1:45205489-45233438    | kinesin family member 2C                                            | 0.463 | 0.42  |
| KIF4A     | chrX:69509878-69640774    | kinesin family member 4A                                            | 0.559 | 0.253 |
| KIFC1     | chr6:33359312-33377824    | kinesin family member C1                                            | 0.614 | 0.413 |
| KISS1     | chr1:204159468-204165619  | KISS-1 metastasis-suppressor                                        | 0.146 | 0.021 |
| KLC1      | chr14:104095524-104181823 | kinesin light chain 1                                               | 1.686 | 2.315 |
| KLC2      | chr1:166024764-66035332   | kinesin light chain 2                                               | 2.362 | 3.525 |
| KLC4      | chr6:43027371-43042833    | kinesin light chain 4                                               | 0.254 | 0.171 |
| KLF11     | chr2:10179239-10194963    | Kruppel-like factor 11                                              | 1.732 | 2.537 |
| KLF15     | chr3:126061477-126076236  | Kruppel-like factor 15                                              | 0.443 | 0.387 |
| KLF16     | chr19:1852397-1876193     | Kruppel-like factor 16                                              | 2.524 | 5.409 |
| KLF2      | chr19:16436560-16438339   | Kruppel-like factor 2                                               | 5.374 | 6.651 |
| KLF4      | chr9:110247132-110252462  | Kruppel-like factor 4 (gut)                                         | 1.901 | 2.441 |
| KLF5      | chr13:73592920-73651676   | Kruppel-like factor 5 (intestinal)                                  | 3.091 | 4.381 |
| KLF6      | chr10:3818187-3827473     | Kruppel-like factor 6                                               | 2.103 | 2.657 |
| KLHDC2    | chr14:50233752-50319723   | kelch domain containing 2                                           | 0.624 | 0.472 |
| KLHDC7A   | chr1:18807423-18812824    | kelch domain containing 7A                                          | 0.32  | 0.061 |
| KLHL29    | chr2:23608297-23931483    | kelch like family member 29                                         | 1.957 | 2.358 |
| KLKB1     | chr4:187135196-187179625  | kallikrein B1                                                       | 0.179 | 0.052 |
| KNG1      | chr3:186435097-186462199  | kininogen 1                                                         | 0.414 | 0.088 |
| KNTC1     | chr12:123011790-123111029 | kinetochore associated 1                                            | 0.94  | 0.316 |
| KPNA4     | chr3:160212782-160287375  | karyopherin subunit alpha 4                                         | 1.599 | 2.211 |
| KRT5      | chr12:52908283-52917348   | keratin 5                                                           | 0.1   | 0.077 |
| KSR1      | chr17:25783511-25953458   | kinase suppressor of ras 1                                          | 1.567 | 2.362 |
| KTI12     | chr1:52485803-52521843    | KTI12 chromatin associated homolog                                  | 1.582 | 2.484 |
| KYNU      | chr2:143635190-143799885  | kynureninase                                                        | 0.408 | 0.177 |
| L3MBTL3   | chr6:130339727-130462594  | l(3)mbt-like 3 (Drosophila)                                         | 0.852 | 0.349 |
| LACTB2    | chr8:71520811-71581471    | lactamase beta 2                                                    | 0.613 | 0.405 |
| LAD1      | chr1:201349965-201369053  | ladinin 1                                                           | 0.342 | 0.039 |
| LAGE3     | chrX:153704800-153707627  | L antigen family member 3                                           | 2.488 | 3.822 |
| LAIR1     | chr19:54865234-54876721   | leukocyte associated immunoglobulin like receptor 1                 | 0.171 | 0.104 |
| LAMA1     | chr18:6941742-7117813     | laminin subunit alpha 1                                             | 3.493 | 8.019 |
| LAMB1     | chr7:107531573-107643804  | laminin subunit beta 1                                              | 0.55  | 0.459 |
| LAMB2P1   | chr3:49190291-49191834    | laminin subunit beta 2 pseudogene 1                                 | 1.398 | 2.238 |
| LAMP3     | chr3:182840002-182880667  | lysosomal associated membrane protein 3                             | 4.142 | 3.787 |
| LAP3      | chr4:17578926-17609590    | leucine aminopeptidase 3                                            | 0.549 | 0.318 |
| LAPTM4B   | chr8:98787808-98864830    | lysosomal protein transmembrane 4 beta                              | 0.596 | 0.329 |
| LARP6     | chr15:71123888-71146498   | La ribonucleoprotein domain family member 6                         | 4.566 | 5.852 |
| LBP       | chr20:36974813-37005653   | lipopolysaccharide binding protein                                  | 0.319 | 0.178 |
| LCA5      | chr6:80194707-80247147    | Leber congenital amaurosis 5                                        | 1.72  | 2.537 |
| LCA5L     | chr21:40752212-40887433   | Leber congenital amaurosis 5-like                                   | 1.703 | 2.231 |
| LCP1      | chr13:46700057-46756459   | lymphocyte cytosolic protein 1                                      | 0.271 | 0.196 |
| LDHA      | chr11:18415935-18429765   | lactate dehydrogenase A                                             | 0.545 | 0.468 |
| LDHD      | chr16:75032914-75150678   | lactate dehydrogenase D                                             | 0.27  | 0.114 |
| LDLRAD4   | chr18:13217692-13652883   | low density lipoprotein receptor class A domain containing 4        | 0.554 | 0.279 |
| LEPREL1   | chr3:189674516-189840226  | prolyl 3-hydroxylase 2                                              | 1.512 | 2.027 |
| LGALS3BP  | chr17:76967334-76976061   | lectin, galactoside binding soluble 3 binding protein               | 0.612 | 0.357 |
| LG14      | chr19:35615416-35633954   | leucine-rich repeat LG1 family member 4                             | 3.346 | 8.441 |
| LGMN      | chr14:93170151-93215047   | legumain                                                            | 1.515 | 2.11  |
| LHFP      | chr13:39917028-40177356   | lipoma HMGIC fusion partner                                         | 2.343 | 3.596 |
| LHFPL2    | chr5:77781037-77944716    | lipoma HMGIC fusion partner-like 2                                  | 4.276 | 7.711 |
| LIMK1     | chr7:73498106-73536855    | LIM domain kinase 1                                                 | 1.576 | 2.537 |
| LINTA     | chr12:81172104-81331866   | lin-7 homolog A, crumbs cell polarity complex component             | 0.625 | 0.067 |
| LIPC      | chr15:58702777-58861073   | lipase C, hepatic type                                              | 0.351 | 0.162 |
| LIPG      | chr18:47086928-47119278   | lipase G, endothelial type                                          | 0.123 | 0.171 |
| LMBRD1    | chr6:70385640-70535979    | LMBR1 domain containing 1                                           | 0.566 | 0.39  |
| LMCD1     | chr3:8543504-8609806      | LIM and cysteine rich domains 1                                     | 2.104 | 2.76  |
| LMNB1     | chr5:126112314-126172712  | lamin B1                                                            | 0.781 | 0.261 |
| LMO4      | chr1:87794150-87864430    | LIM domain only 4                                                   | 2.016 | 3.641 |
| LONP2     | chr16:48274602-48420559   | lon peptidase 2, peroxisomal                                        | 0.669 | 0.483 |
| LONRF2    | chr2:100889752-100939195  | LON peptidase N-terminal domain and ring finger 2                   | 2.065 | 3.446 |
| LPAL2     | chr6:160887452-160941330  | lipoprotein, Lp(a)-like 2, pseudogene                               | 1.445 | 2.105 |
| LPAR6     | chr13:48877874-49056026   | lysophosphatidic acid receptor 6                                    | 0.564 | 0.393 |
| LPCAT3    | chr12:7079943-7125842     | lysophosphatidylcholine acyltransferase 3                           | 0.482 | 0.364 |
| LPIN1     | chr2:11817704-11967603    | lipin 1                                                             | 0.543 | 0.488 |
| LPIN3     | chr20:39969412-39995498   | lipin 3                                                             | 0.29  | 0.199 |
| LRBA      | chr4:151185623-151936831  | LPS responsive beige-like anchor protein                            | 0.723 | 0.443 |
| LRCH4     | chr7:100136761-100205798  | leucine-rich repeats and calponin homology (CH) domain containing 4 | 1.815 | 3.002 |
| LRFN5     | chr14:42076763-42373752   | leucine rich repeat and fibronectin type III domain containing 5    | 0.381 | 0.106 |
| LRIG3     | chr12:59265936-59314319   | leucine-rich repeats and immunoglobulin like domains 3              | 0.504 | 0.269 |
| LRP11     | chr6:150139893-150244214  | LDL receptor related protein 11                                     | 1.639 | 2.397 |
| LRP12     | chr8:105497240-105601252  | LDL receptor related protein 12                                     | 1.672 | 2.287 |
| LRP5      | chr11:68080090-68216743   | LDL receptor related protein 5                                      | 0.604 | 0.399 |
| LRP8      | chr15:53692563-53794035   | LDL receptor related protein 8                                      | 1.643 | 2.606 |
| LRRC31    | chr3:169555611-169587742  | leucine rich repeat containing 31                                   | 0.514 | 0.024 |
| LRRC37A3  | chr17:62850283-62915585   | leucine-rich repeat containing 37 member A3                         | 1.655 | 2.353 |
| LRRC45    | chr17:79981053-79989413   | leucine rich repeat containing 45                                   | 0.425 | 0.187 |
| LRRC61    | chr7:149944300-150035245  | leucine rich repeat containing 61                                   | 0.565 | 0.284 |
| LRRC73    | chr6:43474702-43478081    | leucine rich repeat containing 73                                   | 6.217 | 10.5  |
| LRRC9     | chr14:60385848-60530277   | leucine rich repeat containing 9                                    | 1.669 | 3.271 |
| LRRC11    | chr8:86019322-86058825    | leucine rich repeat and coiled-coil centrosomal protein 1           | 0.758 | 0.457 |
| LRRFIP1   | chr2:238536219-238690290  | leucine rich repeat (in FLII) interacting protein 1                 | 1.751 | 2.405 |
| LRRK2     | chr12:40616913-40763086   | leucine-rich repeat kinase 2                                        | 0.41  | 0.264 |
| LRWD1     | chr7:102105389-102119381  | leucine-rich repeats and WD repeat domain containing 1              | 1.804 | 2.684 |

|           |                           |                                                                              |       |       |
|-----------|---------------------------|------------------------------------------------------------------------------|-------|-------|
| LTBP1     | chr2:33172012-33624575    | latent transforming growth factor beta binding protein 1                     | 2.853 | 4.591 |
| LUM       | chr12:91497231-91505542   | lumican                                                                      | 0.334 | 0.459 |
| LY6E      | chr8:14409901-144103827   | lymphocyte antigen 6 complex, locus E                                        | 0.49  | 0.353 |
| LYPD1     | chr2:133174109-133429070  | LY6/PLAUR domain containing 1                                                | 0.587 | 0.371 |
| LYSMD4    | chr15:100259027-100273626 | LYS domain containing 4                                                      | 1.964 | 2.169 |
| MAD2L1    | chr4:120980501-121087013  | MAD2 mitotic arrest deficient-like 1 (yeast)                                 | 0.762 | 0.362 |
| MADCAM1   | chr19:489128-5055507      | mucosal vascular addressin cell adhesion molecule 1                          | 1.597 | 2.317 |
| MAF       | chr16:79619798-79640625   | v-maf avian musculoaponeurotic fibrosarcoma oncogene homolog                 | 1.341 | 2.818 |
| MAF1      | chr8:145153535-145162515  | MAF1 homolog, negative regulator of RNA polymerase III                       | 1.493 | 2.4   |
| MAFF      | chr22:38597938-38612517   | v-maf avian musculoaponeurotic fibrosarcoma oncogene homolog F               | 7.352 | 13.59 |
| MAFK      | chr7:1570367-1596272      | v-maf avian musculoaponeurotic fibrosarcoma oncogene homolog K               | 2.195 | 3.889 |
| MAGED1    | chrX:51546154-51645451    | MAGE family member D1                                                        | 0.505 | 0.311 |
| MAL2      | chr8:120220609-120257914  | mal, T-cell differentiation protein 2 (gene/pseudogene)                      | 1.603 | 2.265 |
| MAML3     | chr4:140586921-141075233  | mastermind like transcriptional coactivator 3                                | 0.717 | 0.442 |
| MAN1A1    | chr6:119498365-120326957  | mannosidase alpha class 1A member 1                                          | 0.601 | 0.363 |
| MAN1C1    | chr1:25943314-26111258    | mannosidase alpha class 1C member 1                                          | 1.862 | 2.544 |
| MANEA     | chr6:96004542-96206310    | mannosidase endo-alpha                                                       | 0.469 | 0.23  |
| MANF      | chr3:51422691-51426828    | mesencephalic astrocyte derived neurotrophic factor                          | 1.331 | 2.168 |
| MAOA      | chrX:43463486-43606071    | monoamine oxidase A                                                          | 0.391 | 0.181 |
| MAOB      | chrX:43625856-43741721    | monoamine oxidase B                                                          | 0.454 | 0.176 |
| MAP1A     | chr15:43663263-43956662   | microtubule associated protein 1A                                            | 2.77  | 4.903 |
| MAP1B     | chr5:71391685-71505528    | microtubule associated protein 1B                                            | 1.695 | 2.148 |
| MAP1LC3A  | chr20:33134687-33148149   | microtubule associated protein 1 light chain 3 alpha                         | 1.582 | 2.326 |
| MAP1LC3B  | chr16:87425800-87438380   | microtubule associated protein 1 light chain 3 beta                          | 3.142 | 6.471 |
| MAP1LC3B2 | chr12:116997185-117014425 | microtubule associated protein 1 light chain 3 beta 2                        | 2.528 | 4.64  |
| MAP1S     | chr19:17830302-17845324   | microtubule associated protein 1S                                            | 1.649 | 2.323 |
| MAP2      | chr2:210288729-210598991  | microtubule associated protein 2                                             | 2.097 | 2.688 |
| MAP2K3    | chr17:21187967-21218551   | mitogen-activated protein kinase kinase 3                                    | 1.94  | 2.583 |
| MAP2K6    | chr17:67410837-67539093   | mitogen-activated protein kinase kinase 6                                    | 0.23  | 0.048 |
| MAP3K5    | chr6:136878186-137114231  | mitogen-activated protein kinase kinase kinase 5                             | 0.431 | 0.315 |
| MAP3K9    | chr14:71189243-71276174   | mitogen-activated protein kinase kinase kinase 9                             | 1.574 | 2.203 |
| MAP4      | chr3:47892179-48130769    | microtubule associated protein 4                                             | 1.868 | 2.702 |
| MAPKAPK2  | chr1:206858237-206907630  | mitogen-activated protein kinase-activated protein kinase 2                  | 1.538 | 2.693 |
| MAPKBP1   | chr15:42066113-42120120   | mitogen-activated protein kinase binding protein 1                           | 1.469 | 2.495 |
| MARCH1    | chr1:220959432-220988190  | membrane associated ring-CH-type finger 1                                    | 0.757 | 0.377 |
| MARCH2    | chr1:220921486-220958285  | membrane associated ring-CH-type finger 2                                    | 0.362 | 0.3   |
| MARCH3    | chr5:126203405-126366440  | membrane associated ring-CH-type finger 3                                    | 2.165 | 6.846 |
| MARCH5    | chr10:93808396-94113721   | membrane associated ring-CH-type finger 5                                    | 1.512 | 2.045 |
| MARCKS    | chr1:114178526-114184652  | myristoylated alanine rich protein kinase C substrate                        | 1.803 | 2.523 |
| MARCKSL1  | chr1:32799429-32801840    | MARCKS-like 1                                                                | 4.302 | 3.873 |
| MARS      | chr12:57881735-57914300   | methionyl-tRNA synthetase                                                    | 2.976 | 4.432 |
| MARVELD3  | chr16:71660055-71842990   | MARVEL domain containing 3                                                   | 0.416 | 0.443 |
| MASP1     | chr3:186933872-187009810  | mannan binding lectin serine peptidase 1                                     | 0.297 | 0.048 |
| MAST2     | chr1:46269260-46501796    | microtubule associated serine/threonine kinase 2                             | 2.4   | 4.233 |
| MAT1A     | chr10:82031575-82049434   | methionine adenosyltransferase 1A                                            | 0.135 | 0.017 |
| MBNL3     | chrX:131503342-131623996  | muscleblind like splicing regulator 3                                        | 0.437 | 0.362 |
| MCC2C     | chr5:70882654-70954532    | methylcrotonoyl-CoA carboxylase 2                                            | 0.527 | 0.259 |
| MCEE      | chr2:71336764-71357394    | methylmalonyl-CoA epimerase                                                  | 0.459 | 0.277 |
| MCOLN3    | chr1:85483462-85514273    | mucopolipin 3                                                                | 1.898 | 2.455 |
| MCPH1     | chr8:6264112-6619021      | microcephalin 1                                                              | 2.707 | 7.769 |
| MDGA1     | chr3:37600108-37665932    | MAM domain containing glycosylphosphatidylinositol anchor 1                  | 1.847 | 2.476 |
| MDH1      | chr2:63348534-63834330    | malate dehydrogenase 1                                                       | 0.515 | 0.367 |
| MECOM     | chr3:168801286-169381563  | MDS1 and EVI1 complex locus                                                  | 0.731 | 0.428 |
| MED26     | chr19:16683381-16739015   | mediator complex subunit 26                                                  | 0.948 | 2.011 |
| MEF2A     | chr15:100105682-100257018 | myocyte enhancer factor 2A                                                   | 1.857 | 3.19  |
| MEF2C     | chr5:88014057-88200229    | myocyte enhancer factor 2C                                                   | 1.394 | 2.72  |
| MERTK     | chr2:112656043-112786945  | MER proto-oncogene, tyrosine kinase                                          | 1.329 | 2.717 |
| MESDC1    | chr15:81293294-81296345   | mesoderm development candidate 1                                             | 2.072 | 3.165 |
| MEST      | chr7:130126015-130371406  | mesoderm specific transcript                                                 | 0.738 | 0.444 |
| METAP1D   | chr2:172864803-172947273  | methionyl aminopeptidase type 1D (mitochondrial)                             | 0.456 | 0.247 |
| METRNL    | chr17:81037506-81058331   | meteorin, glial cell differentiation regulator-like                          | 2.116 | 4.587 |
| METTL20   | chr12:31800093-31822289   | electron transfer flavoprotein beta subunit lysine methyltransferase         | 0.668 | 0.398 |
| METTL22   | chr16:8715526-8750298     | methyltransferase like 22                                                    | 1.335 | 2.02  |
| METTL5    | chr2:170655321-170681438  | methyltransferase like 5                                                     | 0.641 | 0.426 |
| METTL7A   | chr12:51318533-51326300   | methyltransferase like 7A                                                    | 0.369 | 0.148 |
| MEX3B     | chr15:82334118-82338551   | mex-3 RNA binding family member B                                            | 2.579 | 3.584 |
| MEX3C     | chr18:48700919-48724051   | mex-3 RNA binding family member C                                            | 1.697 | 2.543 |
| MEX3D     | chr19:1554667-1568057     | mex-3 RNA binding family member D                                            | 2.241 | 3.024 |
| MFHAS1    | chr8:8640861-8751143      | malignant fibrous histiocytoma amplified sequence 1                          | 1.613 | 2.131 |
| MFS10     | chr4:2932287-2936586      | major facilitator superfamily domain containing 10                           | 1.569 | 2.512 |
| MFS12     | chr19:3506294-3557571     | major facilitator superfamily domain containing 12                           | 1.774 | 2.995 |
| MFS12A    | chr1:40420783-40435810    | major facilitator superfamily domain containing 2A                           | 0.196 | 0.283 |
| MGAT5     | chr2:13487545-135212193   | mannosyl (alpha-1,6)-glycoprotein beta-1,6-N-acetylglucosaminyltransferase   | 1.405 | 2.32  |
| MGME1     | chr20:17949564-17971766   | mitochondrial genome maintenance exonuclease 1                               | 0.759 | 0.388 |
| MGMT      | chr10:131265453-131565928 | O-6-methylguanine-DNA methyltransferase                                      | 0.515 | 0.347 |
| MGP       | chr2:15034114-15038853    | matrix Gla protein                                                           | 0.317 | 0.206 |
| MGST1     | chr12:16500075-16530123   | microsomal glutathione S-transferase 1                                       | 0.55  | 0.239 |
| MGST2     | chr4:140586921-141075233  | microsomal glutathione S-transferase 2                                       | 0.353 | 0.179 |
| MICA      | chr6:31367560-31478901    | MHC class I polypeptide-related sequence A                                   | 1.606 | 2.387 |
| MICAL2    | chr1:12132111-12285337    | microtubule associated monoxygenase, calponin and LIM domain containing 1    | 1.481 | 2.346 |
| MIDN      | chr19:1248544-1259440     | midnolin                                                                     | 2.242 | 2.496 |
| MIPPEP3   | chr13:21872263-22033508   | mitochondrial intermediate peptidase pseudogene 3                            | 2.114 | 3.939 |
| MIR100HG  | chr11:121959810-122073770 | mir-100-let-7a-2 cluster host gene                                           | 1.747 | 2.573 |
| MITF      | chr3:69788585-70017836    | microphthalmia-associated transcription factor                               | 0.49  | 0.366 |
| NIK167    | chr10:129894924-129924468 | marker of proliferation Ki-67                                                | 0.495 | 0.172 |
| NIKMK2    | chr19:2037459-2051243     | MAP kinase interacting serine/threonine kinase 2                             | 2.768 | 4.719 |
| MLIP      | chr6:53875386-54131495    | muscular LMNA-interacting protein                                            | 0.096 | 0.012 |
| MLKL      | chr16:74705752-74735077   | mixed lineage kinase domain-like                                             | 0.328 | 0.257 |
| MLX       | chr17:40719077-40729849   | MLX, MAX dimerization protein                                                | 0.48  | 0.261 |
| MLXIP     | chr12:122516651-122631893 | MLX interacting protein                                                      | 1.41  | 2.402 |
| MMAB      | chr12:109991520-110035071 | methylmalonic aciduria (cobalamin deficiency) cblB type                      | 0.383 | 0.195 |
| MMACHC    | chr1:45965855-45988562    | methylmalonic aciduria (cobalamin deficiency) cblC type, with homocystinuria | 0.261 | 0.103 |
| MMD       | chr17:53469973-53499341   | monocyte to macrophage differentiation associated                            | 1.822 | 2.834 |
| MME       | chr3:154652824-154901518  | membrane metallo-endopeptidase                                               | 0.464 | 0.4   |
| MMP10     | chr11:102641232-102651359 | matrix metalloproteinase 10                                                  | 57.64 | 113.1 |
| MMP16     | chr8:89044316-89339800    | matrix metalloproteinase 16                                                  | 1.76  | 2.517 |
| MMP19     | chr12:56211805-56236767   | matrix metalloproteinase 19                                                  | 0.561 | 0.323 |
| MMP3      | chr11:102654406-102714342 | matrix metalloproteinase 3                                                   | 0.875 | 3.928 |
| MMP7      | chr11:102391238-102401478 | matrix metalloproteinase 7                                                   | 0.464 | 0.469 |
| MOB3A     | chr19:2071017-2096455     | MOB kinase activator 3A                                                      | 1.404 | 2.035 |
| MOC51     | chr6:39760158-39902290    | molybdenum cofactor synthesis 1                                              | 0.512 | 0.429 |
| MOGAT1    | chr2:223536281-223605238  | monoacylglycerol O-acyltransferase 1                                         | 0.372 | 0.132 |
| MON1A     | chr3:49946301-50114685    | MON1 homolog A, secretory trafficking associated                             | 0.613 | 0.465 |

|         |                           |                                                                                                                              |       |       |
|---------|---------------------------|------------------------------------------------------------------------------------------------------------------------------|-------|-------|
| MORC4   | chrX:106183834-106259004  | MORC family CW-type zinc finger 4                                                                                            | 1.685 | 2.352 |
| MOSPD1  | chrX:134015143-134049323  | motile sperm domain containing 1                                                                                             | 1.5   | 2.093 |
| MOXD1   | chr6:132617193-132722664  | monooxygenase DBH like 1                                                                                                     | 1.478 | 2.021 |
| MPC2    | chr1:167885912-168045083  | mitochondrial pyruvate carrier 2                                                                                             | 0.498 | 0.353 |
| MPDZ    | chr9:13105672-13279620    | multiple PDZ domain crumbs cell polarity complex component                                                                   | 0.529 | 0.276 |
| MPI     | chr5:75180870-75199593    | mannose phosphate isomerase                                                                                                  | 0.591 | 0.357 |
| MPP3    | chr17:41878166-41910547   | membrane palmitoylated protein 3                                                                                             | 2.383 | 2.982 |
| MPPE1   | chr18:11689013-11908865   | metallophosphoesterase 1                                                                                                     | 0.689 | 0.368 |
| MPZ     | chr1:161274524-161279762  | myelin protein zero                                                                                                          | 0.45  | 0.104 |
| MPZL1   | chr1:167691086-167761156  | myelin protein zero like 1                                                                                                   | 1.874 | 2.517 |
| MPZL2   | chr1:118124130-118135251  | myelin protein zero like 2                                                                                                   | 0.638 | 0.109 |
| MPZL3   | chr11:118097414-118123161 | myelin protein zero like 3                                                                                                   | 0.729 | 0.451 |
| MRC2    | chr17:60704761-60770962   | mannose receptor C type 2                                                                                                    | 2.439 | 4.79  |
| MREG    | chr2:216807313-216946549  | melanoregulin                                                                                                                | 0.437 | 0.201 |
| MRO     | chr18:48321489-48351754   | maestro                                                                                                                      | 0.281 | 0.153 |
| MRPL1   | chr4:78783320-78874072    | mitochondrial ribosomal protein L1                                                                                           | 0.555 | 0.317 |
| MRPL11  | chr1:166202549-66206310   | mitochondrial ribosomal protein L11                                                                                          | 0.606 | 0.417 |
| MRPL13  | chr8:121393353-121535875  | mitochondrial ribosomal protein L13                                                                                          | 0.584 | 0.392 |
| MRPL15  | chr8:55047712-55062105    | mitochondrial ribosomal protein L15                                                                                          | 0.541 | 0.498 |
| MRPL16  | chr1:159522435-59612974   | mitochondrial ribosomal protein L16                                                                                          | 0.522 | 0.29  |
| MRPL19  | chr2:75873658-75938455    | mitochondrial ribosomal protein L19                                                                                          | 0.567 | 0.244 |
| MRPL23  | chr11:19668501-2011150    | mitochondrial ribosomal protein L23                                                                                          | 0.558 | 0.349 |
| MRPL24  | chr1:156707093-156710995  | mitochondrial ribosomal protein L24                                                                                          | 0.587 | 0.307 |
| MRPL27  | chr17:48445227-48450562   | mitochondrial ribosomal protein L27                                                                                          | 0.636 | 0.442 |
| MRPL35  | chr2:86423940-86565206    | mitochondrial ribosomal protein L35                                                                                          | 0.625 | 0.469 |
| MRPL39  | chr2:126957967-26979801   | mitochondrial ribosomal protein L39                                                                                          | 0.696 | 0.421 |
| MRPS12  | chr19:39405903-39423659   | mitochondrial ribosomal protein S12                                                                                          | 0.511 | 0.328 |
| MRPS27  | chr5:71515235-71616085    | mitochondrial ribosomal protein S27                                                                                          | 0.723 | 0.455 |
| MRPS30  | chr5:44808646-44823149    | mitochondrial ribosomal protein S30                                                                                          | 0.598 | 0.434 |
| MRPS35  | chr12:27863705-27909237   | mitochondrial ribosomal protein S35                                                                                          | 0.717 | 0.49  |
| MRPS36  | chr5:68513572-68525985    | mitochondrial ribosomal protein S36                                                                                          | 0.503 | 0.43  |
| MRPS5   | chr2:95752951-95787754    | mitochondrial ribosomal protein S5                                                                                           | 0.535 | 0.405 |
| MRPS9   | chr2:105654482-105716418  | mitochondrial ribosomal protein S9                                                                                           | 0.632 | 0.472 |
| MSC     | chr8:72753776-72987819    | musculin                                                                                                                     | 3.808 | 6.042 |
| MSI2    | chr17:55333930-55762019   | musashi RNA binding protein 2                                                                                                | 0.492 | 0.297 |
| MSMO1   | chr4:166248817-166264314  | methylsterol monooxygenase 1                                                                                                 | 0.282 | 0.152 |
| MSR1    | chr8:15965357-16512558    | macrophage scavenger receptor 1                                                                                              | 1.803 | 2.485 |
| MSRB1   | chr16:1985588-1993303     | methionine sulfoxide reductase B1                                                                                            | 0.392 | 0.276 |
| MSRB2   | chr10:23384426-23411641   | methionine sulfoxide reductase B2                                                                                            | 0.688 | 0.393 |
| MST1    | chr3:49721379-49726943    | macrophage stimulating 1                                                                                                     | 0.839 | 0.344 |
| MST1L   | chr1:17080972-17090975    | macrophage stimulating 1-like                                                                                                | 0.754 | 0.401 |
| MST1P2  | chr1:16793788-16976915    | macrophage stimulating 1 (hepatocyte growth factor-like) pseudogene 2                                                        | 0.644 | 0.386 |
| MSX1    | chr4:4861391-4865660      | msh homeobox 1                                                                                                               | 1.957 | 2.476 |
| MT1F    | chr16:56691854-56693215   | metallothionein 1F                                                                                                           | 0.701 | 0.183 |
| MTA3    | chr2:42795670-42984055    | metastasis associated 1 family member 3                                                                                      | 0.633 | 0.328 |
| MTCH2   | chr1:147638857-47664206   | mitochondrial carrier 2                                                                                                      | 0.624 | 0.427 |
| MTHFD1  | chr4:64854758-64926809    | methylenetetrahydrofolate dehydrogenase (NADP+ dependent) 1, methenyltetrahydrofolate dehydrogenase (NADP+ dependent) 1-like | 0.526 | 0.249 |
| MTHFD1L | chr6:151186814-151423044  | methylenetetrahydrofolate dehydrogenase (NADP+ dependent) 1-like                                                             | 6.05  | 9.278 |
| MTMR10  | chr15:31195988-31283877   | myotubularin related protein 10                                                                                              | 0.637 | 0.424 |
| MTMR3   | chr22:30279111-30573062   | myotubularin related protein 3                                                                                               | 0.117 | 0.072 |
| MTMR4   | chr17:56566892-56595514   | myotubularin related protein 4                                                                                               | 0.468 | 0.417 |
| MTMR9   | chr8:11141999-11185654    | myotubularin related protein 9                                                                                               | 1.455 | 2.107 |
| MTSS1L  | chr16:70695106-70720110   | metastasis suppressor 1-like                                                                                                 | 2.141 | 3.764 |
| MTTP    | chr4:100485239-100545154  | microsomal triglyceride transfer protein                                                                                     | 0.073 | 0.007 |
| MTUS1   | chr8:17501302-17658620    | microtubule associated tumor suppressor 1                                                                                    | 0.413 | 0.26  |
| MUM1    | chr19:1354950-1378430     | melanoma associated antigen (mutated) 1                                                                                      | 0.575 | 0.498 |
| MUM1L1  | chrX:105412297-105453017  | melanoma associated antigen (mutated) 1-like 1                                                                               | 0.499 | 0.246 |
| MUT     | chr6:49398061-49431041    | methylmalonyl-CoA mutase                                                                                                     | 0.388 | 0.22  |
| MVK     | chr12:109991520-110035071 | mevalonate kinase                                                                                                            | 0.258 | 0.185 |
| MXD1    | chr2:70142172-70170076    | MAX dimerization protein 1                                                                                                   | 2.518 | 4.911 |
| MYADM   | chr19:54369610-54379689   | myeloid-associated differentiation marker                                                                                    | 2.87  | 2.972 |
| MYC     | chr8:128748314-128753680  | v-myc avian myelocytomatosis viral oncogene homolog                                                                          | 1.904 | 2.18  |
| MYD88   | chr3:38179291-38184513    | myeloid differentiation primary response 88                                                                                  | 0.505 | 0.309 |
| MYH14   | chr19:50706884-50813801   | myosin, heavy chain 14, non-muscle                                                                                           | 0.69  | 0.491 |
| MYH9    | chr22:36677320-36784063   | myosin, heavy chain 9, non-muscle                                                                                            | 3.069 | 5.511 |
| MYL12B  | chr8:3262110-3278282      | myosin light chain 12B                                                                                                       | 0.628 | 0.386 |
| MYL6B   | chr12:56546203-56551771   | myosin light chain 6B                                                                                                        | 0.458 | 0.358 |
| MYLIP   | chr6:16129316-16151258    | myosin regulatory light chain interacting protein                                                                            | 1.387 | 2.142 |
| MYLK    | chr3:123304402-123603149  | myosin light chain kinase                                                                                                    | 0.24  | 0.051 |
| MYO15B  | chr17:73584138-73663281   | myosin XVb                                                                                                                   | 0.321 | 0.13  |
| MYO1D   | chr17:30819627-31204123   | myosin ID                                                                                                                    | 1.936 | 3.069 |
| MYO1E   | chr15:59392743-59665083   | myosin IE                                                                                                                    | 1.765 | 3.017 |
| MYO9B   | chr19:17186590-17324104   | myosin IXb                                                                                                                   | 1.48  | 2.276 |
| MYRF    | chr11:61520088-61556188   | myelin regulatory factor                                                                                                     | 0.944 | 0.403 |
| NAALAD2 | chr1:189867817-89926042   | N-acetylated alpha-linked acidic dipeptidase 2                                                                               | 0.484 | 0.412 |
| NABP1   | chr2:192542707-192562133  | nucleic acid binding protein 1                                                                                               | 2.137 | 2.793 |
| NANOS1  | chr10:120789227-120794526 | nanos homolog 1 (Drosophila)                                                                                                 | 2.035 | 2.96  |
| NANS    | chr9:100818958-100881488  | N-acetylneuraminidase synthase                                                                                               | 1.717 | 2.699 |
| NAT2    | chr8:18244319-18258723    | N-acetyltransferase 2 (arylamine N-acetyltransferase)                                                                        | 0.414 | 0.107 |
| NAV1    | chr1:201508360-201796102  | neuron navigator 1                                                                                                           | 3.574 | 7.698 |
| NAV2    | chr1:19372270-20143147    | neuron navigator 2                                                                                                           | 2.073 | 2.741 |
| NBPF1   | chr1:16793788-16976915    | neuroblastoma breakpoint family member 15                                                                                    | 2.26  | 3.357 |
| NCALD   | chr8:102698769-103137135  | neurocalcin delta                                                                                                            | 0.524 | 0.233 |
| NCAM1   | chr11:112831968-113149158 | neural cell adhesion molecule 1                                                                                              | 5.652 | 11.79 |
| NCAPD2  | chr12:6601315-6641132     | non-SMC condensin I complex subunit D2                                                                                       | 0.531 | 0.412 |
| NCAPG   | chr4:17812435-18023483    | non-SMC condensin I complex subunit G                                                                                        | 0.707 | 0.182 |
| NCAPG2  | chr7:158423968-158497520  | non-SMC condensin II complex subunit G2                                                                                      | 0.797 | 0.33  |
| NCDN    | chr1:36023392-36032529    | neurochondrin                                                                                                                | 1.347 | 2.157 |
| NCF2    | chr1:183524696-183560056  | neutrophil cytosolic factor 2                                                                                                | 4.615 | 3.955 |
| NCK2    | chr2:106361519-106510730  | NCK adaptor protein 2                                                                                                        | 1.656 | 2.492 |
| NCKAP5  | chr2:133429371-134326069  | NCK associated protein 5                                                                                                     | 0.605 | 0.069 |
| NCOA2   | chr8:71022002-71317651    | nuclear receptor coactivator 2                                                                                               | 0.625 | 0.468 |
| NCOR1P1 | chr20:26084051-26094677   | nuclear receptor corepressor 1 pseudogene 1                                                                                  | 1.499 | 2.158 |
| NCS1    | chr9:132934856-132999645  | neuronal calcium sensor 1                                                                                                    | 2.233 | 3.313 |
| NDC80   | chr18:2571509-2616634     | NDC80 kinetochore complex component                                                                                          | 0.379 | 0.127 |
| NDE1    | chr16:15737123-15950887   | nudE neurodevelopment protein 1                                                                                              | 1.677 | 3.09  |
| NDEL1   | chr17:8339169-8371495     | nudE neurodevelopment protein 1 like 1                                                                                       | 1.797 | 2.751 |
| NDRG1   | chr8:134249413-134309547  | N-myc downstream regulated 1                                                                                                 | 1.552 | 2.105 |
| NDRG2   | chr14:21484921-21493935   | NDRG family member 2                                                                                                         | 0.313 | 0.125 |
| NDUFA1  | chrX:119004494-119010629  | NADH:ubiquinone oxidoreductase subunit A1                                                                                    | 0.515 | 0.368 |
| NDUFA10 | chr2:240896788-240964820  | NADH:ubiquinone oxidoreductase subunit A10                                                                                   | 0.637 | 0.42  |
| NDUFA5  | chr7:123181082-123197958  | NADH:ubiquinone oxidoreductase subunit A5                                                                                    | 0.638 | 0.445 |
| NDUFA9  | chr12:4758263-4796720     | NADH:ubiquinone oxidoreductase subunit A9                                                                                    | 0.535 | 0.276 |

|           |                           |                                                                      |       |       |
|-----------|---------------------------|----------------------------------------------------------------------|-------|-------|
| NDUFB1    | chr14:92582467-92588153   | NADH:ubiquinone oxidoreductase subunit B1                            | 0.547 | 0.402 |
| NDUFB3    | chr2:201838044-201950473  | NADH:ubiquinone oxidoreductase subunit B3                            | 0.559 | 0.422 |
| NDUFB4    | chr3:120315127-120321258  | NADH:ubiquinone oxidoreductase subunit B4                            | 0.602 | 0.451 |
| NDUFB5    | chr3:179322574-179342288  | NADH:ubiquinone oxidoreductase subunit B5                            | 0.492 | 0.363 |
| NDUFS2    | chr1:161169104-161184184  | NADH:ubiquinone oxidoreductase core subunit S2                       | 0.55  | 0.349 |
| NDUFS3    | chr1:147487488-47606116   | NADH:ubiquinone oxidoreductase core subunit S3                       | 0.534 | 0.371 |
| NDUFV1    | chr1:167374322-67380012   | NADH:ubiquinone oxidoreductase core subunit V1                       | 0.585 | 0.349 |
| NDUFV2    | chr18:9102627-9134343     | NADH:ubiquinone oxidoreductase core subunit V2                       | 0.613 | 0.436 |
| NEAT1     | chr1:165190268-65194003   | nuclear paraspeckle assembly transcript 1 (non-protein coding)       | 1.502 | 2.25  |
| NEBL      | chr10:21068902-21463852   | nebullette                                                           | 4.568 | 7.193 |
| NEIL3     | chr4:178230990-178291191  | nei like DNA glycosylase 3                                           | 0.73  | 0.212 |
| NEK11     | chr3:130745673-131100319  | NIMA related kinase 11                                               | 1.529 | 2.341 |
| NELFCD    | chr20:57556262-57570188   | negative elongation factor complex member C/D                        | 0.656 | 0.36  |
| NELL2     | chr12:44902067-45342527   | neural EGFL like 2                                                   | 1.866 | 2.962 |
| NET1      | chr10:5454513-5501019     | neuroepithelial cell transforming 1                                  | 0.41  | 0.21  |
| NEU1      | chr6:31826828-31830709    | neuraminidase 1 (lysosomal sialidase)                                | 1.829 | 2.768 |
| NFE2L1    | chr17:46125685-46139022   | nuclear factor, erythroid 2 like 1                                   | 1.546 | 2.05  |
| NFIA      | chr1:61542945-61928460    | nuclear factor 1A                                                    | 0.568 | 0.365 |
| NFIL3     | chr9:94171326-94187046    | nuclear factor, interleukin 3 regulated                              | 1.52  | 2.228 |
| NFKB2     | chr10:104153866-104162286 | nuclear factor kappa B subunit 2                                     | 1.845 | 2.79  |
| NFS1      | chr20:34256609-34288902   | NFS1 cysteine desulfurase                                            | 0.649 | 0.387 |
| NGEF      | chr2:233741396-233877976  | neuronal guanine nucleotide exchange factor                          | 0.175 | 0.14  |
| NGFR      | chr17:47572654-47592382   | nerve growth factor receptor                                         | 10.29 | 35.37 |
| NGFRAP1   | chrX:102631267-102633002  | brain expressed X-linked 3                                           | 0.55  | 0.354 |
| NGRN      | chr15:90808894-90815443   | neugrin, neurite outgrowth associated                                | 1.832 | 2.692 |
| NHLRC3    | chr13:39612447-39624564   | NHL repeat containing 3                                              | 0.528 | 0.267 |
| NHS       | chrX:17393542-17754113    | NHS actin remodeling regulator                                       | 1.524 | 2.895 |
| NHSL1     | chr6:138725335-139018519  | NHS like 1                                                           | 1.472 | 2.206 |
| NIN       | chr14:51186480-51298208   | ninein                                                               | 1.681 | 2.044 |
| NIPSNAP1  | chr22:29950797-29977326   | nipsnap homolog 1 (C. elegans)                                       | 0.301 | 0.138 |
| NIPSNAP3A | chr9:107509968-107522403  | nipsnap homolog 3A                                                   | 0.582 | 0.406 |
| NIT2      | chr3:99979660-100077124   | nitrilase family member 2                                            | 0.606 | 0.371 |
| NKD2      | chr5:1009076-1038927      | naked cuticle homolog 2                                              | 2.27  | 2.826 |
| NKX3-1    | chr8:23536205-23540450    | NK3 homeobox 1                                                       | 2.689 | 3.839 |
| NNT       | chr5:43571685-43705668    | nicotinamide nucleotide transhydrogenase                             | 0.581 | 0.296 |
| NOS1AP    | chr1:162039483-162356896  | nitric oxide synthase 1 adaptor protein                              | 0.343 | 0.238 |
| NOTCH1    | chr9:139388895-139440238  | notch 1                                                              | 1.13  | 2.427 |
| NOXA1     | chr9:140317833-140335901  | NADPH oxidase activator 1                                            | 0.576 | 0.218 |
| NOXO1     | chr16:2021894-2037750     | NADPH oxidase organizer 1                                            | 1.623 | 2.511 |
| NPC1      | chr18:21083433-21166937   | Niemann-Pick disease, type C1                                        | 1.962 | 3.976 |
| NPIP      | chr16:15029230-15045931   | nuclear pore complex interacting protein family member A1            | 1.748 | 2.714 |
| NPR3      | chr5:32710011-32791830    | natriuretic peptide receptor 3                                       | 0.241 | 0.127 |
| NPTX2     | chr7:98246596-98259182    | neuronal pentraxin 2                                                 | 1.657 | 2.55  |
| NPTXR     | chr22:39214454-39240023   | neuronal pentraxin receptor                                          | 3.017 | 5.879 |
| NPY6R     | chr5:137136881-137147602  | neuropeptide Y receptor Y6 (pseudogene)                              | 0.398 | 0.117 |
| NQO1      | chr16:69743303-69760533   | NAD(P)H quinone dehydrogenase 1                                      | 0.139 | 0.077 |
| NR1D2     | chr3:23986750-24022109    | nuclear receptor subfamily 1 group D member 2                        | 1.613 | 2.497 |
| NR1H4     | chr12:100867550-100958177 | nuclear receptor subfamily 1 group H member 4                        | 0.285 | 0.039 |
| NR1I2     | chr3:119499330-119537651  | nuclear receptor subfamily 1 group I member 2                        | 0.184 | 0.029 |
| NR1I3     | chr1:161195562-161208000  | nuclear receptor subfamily 1 group I member 3                        | 0.136 | 0.033 |
| NR2C1     | chr12:95397609-95467452   | nuclear receptor subfamily 2 group C member 1                        | 0.669 | 0.414 |
| NR2F6     | chr19:17342693-17356348   | nuclear receptor subfamily 2 group F member 6                        | 0.537 | 0.413 |
| NR4A1     | chr12:52416615-52453291   | nuclear receptor subfamily 4 group A member 1                        | 3.26  | 4.587 |
| NR5A2     | chr1:199996729-200146550  | nuclear receptor subfamily 5 group A member 2                        | 0.373 | 0.199 |
| NR6A1     | chr9:127279363-127533577  | nuclear receptor subfamily 6 group A member 1                        | 1.472 | 2.074 |
| NRF1      | chr7:129251554-129396922  | nuclear respiratory factor 1                                         | 4.22  | 4.893 |
| NRG2      | chr5:139124508-139423225  | neuregulin 2                                                         | 0.488 | 0.268 |
| NRG4      | chr15:76228317-76304789   | neuregulin 4                                                         | 0.309 | 0.171 |
| NRP1      | chr10:33466250-33624239   | neuropilin 1                                                         | 0.584 | 0.453 |
| NRXN2     | chr1:164373645-64490660   | neurexin 2                                                           | 0.132 | 0.044 |
| NRXN3     | chr14:78636715-80350650   | neurexin 3                                                           | 1.727 | 2.349 |
| NSDHL     | chrX:151995870-152037907  | NAD(P) dependent steroid dehydrogenase-like                          | 0.264 | 0.172 |
| NSG1      | chr4:4387982-4543775      | neuron specific gene family member 1                                 | 0.279 | 0.199 |
| NSMF      | chr9:140339707-140353854  | NMDA receptor synaptonuclear signaling and neuronal migration factor | 1.779 | 2.52  |
| NT5M      | chr17:17206645-17250977   | 5',3'-nucleotidase, mitochondrial                                    | 1.927 | 2.405 |
| NTHL1     | chr16:2089815-2097867     | nth-like DNA glycosylase 1                                           | 0.435 | 0.248 |
| NTN1      | chr17:8924858-9147317     | netrin 1                                                             | 1.749 | 4.046 |
| NTN4      | chr12:96043030-96189362   | netrin 4                                                             | 2.732 | 4.182 |
| NTPCR     | chr1:233086335-233114824  | nucleoside-triphosphatase, cancer-related                            | 0.531 | 0.31  |
| NUBPL     | chr14:32020110-32330429   | nucleotide binding protein like 1                                    | 0.652 | 0.29  |
| NUDT12    | chr5:102877651-102898502  | nudix hydrolase 12                                                   | 0.736 | 0.379 |
| NUDT13    | chr10:74766979-74927853   | nudix hydrolase 13                                                   | 0.446 | 0.225 |
| NUDT16    | chr3:131100514-131107674  | nudix hydrolase 16                                                   | 0.301 | 0.186 |
| NUDT4     | chr12:93771700-93797024   | nudix hydrolase 4                                                    | 1.446 | 2.083 |
| NUDT5     | chr10:12171639-12292589   | nudix hydrolase 5                                                    | 0.652 | 0.433 |
| NUDT7     | chr16:77756388-77776180   | nudix hydrolase 7                                                    | 0.595 | 0.32  |
| NUF2      | chr1:163291722-163325553  | NUF2, NDC80 kinetochore complex component                            | 0.605 | 0.273 |
| NUPL1     | chr13:25875665-25916562   | nucleoporin 58kDa                                                    | 1.645 | 2.198 |
| NXN       | chr17:701510-883040       | nucleoredoxin                                                        | 1.654 | 2.507 |
| OAF       | chr1:120081472-120100651  | out at first homolog                                                 | 0.345 | 0.224 |
| OAS2      | chr12:113416203-113449528 | 2'-5'-oligoadenylate synthetase 2                                    | 0.41  | 0.195 |
| OBSL1     | chr2:220415333-220436952  | obscurin-like 1                                                      | 0.444 | 0.302 |
| OCIA2     | chr4:48887395-48908940    | OCIA domain containing 2                                             | 0.481 | 0.26  |
| ODF2      | chr9:131217433-131263636  | outer dense fiber of sperm tails 2                                   | 2.011 | 3.148 |
| OGDHL     | chr10:50942600-50970425   | oxoglutarate dehydrogenase-like                                      | 0.373 | 0.182 |
| OGFRL1    | chr6:71998377-72130579    | opioid growth factor receptor-like 1                                 | 1.347 | 2.032 |
| OGG1      | chr3:9791627-9811668      | 8-oxoguanine DNA glycosylase                                         | 1.481 | 2.402 |
| OLFM2     | chr19:9964393-10047070    | olfactomedin 2                                                       | 0.665 | 0.317 |
| OLFML3    | chr1:114521659-114524875  | olfactomedin like 3                                                  | 0.102 | 0.029 |
| OMA1      | chr1:58946337-59012607    | OMA1 zinc metalloprotease                                            | 0.788 | 0.4   |
| ONECUT1   | chr15:53042094-53082353   | one cut homeobox 1                                                   | 0.159 | 0.051 |
| OPLAH     | chr8:145051319-145115633  | 5-oxoprolinase (ATP-hydrolysing)                                     | 0.65  | 0.417 |
| ORAI1     | chr12:122064454-122080980 | ORAI calcium release-activated calcium modulator 1                   | 2.311 | 4.627 |
| OSBP2     | chr22:31090108-31375380   | oxysterol binding protein 2                                          | 2.098 | 4.14  |
| OSBPL10   | chr3:31702316-32033228    | oxysterol binding protein like 10                                    | 2.591 | 2.382 |
| OSBPL5    | chr1:3105349-3186582      | oxysterol binding protein like 5                                     | 0.346 | 0.277 |
| OSGEP1    | chr2:190539171-190627924  | O-sialoglycoprotein endopeptidase-like 1                             | 0.689 | 0.336 |
| OSMR      | chr5:38845184-38935752    | oncostatin M receptor                                                | 1.401 | 2.101 |
| OTC       | chrX:38208972-38282141    | ornithine carbamoyltransferase                                       | 0.261 | 0.037 |
| OTUD1     | chr10:23728197-23731310   | OTU deubiquitinase 1                                                 | 1.897 | 3.368 |
| OTUD3     | chr1:20208887-20239440    | OTU deubiquitinase 3                                                 | 1.532 | 2.528 |
| OTUD7A    | chr15:31773191-31947542   | OTU deubiquitinase 7A                                                | 1.843 | 3.485 |
| OTX1      | chr2:63277191-63284966    | orthodenticle homeobox 1                                             | 0.715 | 0.47  |

|          |                           |                                                                             |       |       |
|----------|---------------------------|-----------------------------------------------------------------------------|-------|-------|
| OXA1L    | chr14:23234798-23241638   | oxidase (cytochrome c) assembly 1-like                                      | 0.674 | 0.482 |
| OXNAD1   | chr3:16306666-16555222    | oxidoreductase NAD binding domain containing 1                              | 0.535 | 0.425 |
| P2RX5    | chr17:3468739-3599698     | purinergic receptor P2X 5                                                   | 2.657 | 4.53  |
| P2RX7    | chr12:121570621-121625817 | purinergic receptor P2X 7                                                   | 1.967 | 3.013 |
| P4HA2    | chr5:131528259-131563556  | prolyl 4-hydroxylase subunit alpha 2                                        | 2.263 | 2.928 |
| PABPC4   | chr1:40026483-40042555    | poly(A) binding protein cytoplasmic 4                                       | 1.553 | 2.545 |
| PACS1    | chr1:165837823-66012218   | phosphofurin acidic cluster sorting protein 1                               | 1.718 | 2.552 |
| PAFAH2   | chr1:26282460-26335416    | platelet activating factor acetylhydrolase 2                                | 0.522 | 0.372 |
| PAGE2B   | chrX:55101488-55105336    | PAGE family member 2                                                        | 0.394 | 0.251 |
| PAH      | chr12:103232103-103311381 | phenylalanine hydroxylase                                                   | 0.304 | 0.027 |
| PAK1     | chr1:177032920-77185108   | p21 protein (Cdc42/Rac)-activated kinase 1                                  | 0.617 | 0.295 |
| PAK2     | chr3:196433147-196559518  | p21 protein (Cdc42/Rac)-activated kinase 2                                  | 1.699 | 2.122 |
| PAMR1    | chr11:35453375-35547176   | peptidase domain containing associated with muscle regeneration 1           | 2.67  | 3.51  |
| PANK1    | chr10:91339253-91405329   | pantothenate kinase 1                                                       | 0.307 | 0.226 |
| PAQR4    | chr16:3019256-3030540     | progesterin and adipoQ receptor family member 4                             | 2.701 | 2.946 |
| PAQR5    | chr15:69591238-69700405   | progesterin and adipoQ receptor family member 5                             | 2.463 | 3.342 |
| PARM1    | chr4:75858284-75975325    | prostate androgen-regulated mucin-like protein 1                            | 1.607 | 2.309 |
| PARP10   | chr8:145051319-145115633  | poly(ADP-ribose) polymerase family member 10                                | 0.54  | 0.482 |
| PARP14   | chr3:122399671-122449687  | poly(ADP-ribose) polymerase family member 14                                | 0.646 | 0.359 |
| PARP4    | chr13:24995068-25086948   | poly(ADP-ribose) polymerase family member 4                                 | 0.667 | 0.464 |
| PARP9    | chr3:122246759-122294049  | poly(ADP-ribose) polymerase family member 9                                 | 0.592 | 0.314 |
| PASK     | chr2:242045468-242123064  | PAS domain containing serine/threonine kinase                               | 0.796 | 0.19  |
| PAX8     | chr2:113973549-114036498  | paired box 8                                                                | 2.024 | 4.524 |
| PBK      | chr8:27667137-27714062    | PDZ binding kinase                                                          | 0.487 | 0.148 |
| PBX1     | chr1:164528596-164821067  | pre-B-cell leukemia homeobox 1                                              | 0.367 | 0.19  |
| PBX2     | chr6:32152509-32157963    | pre-B-cell leukemia homeobox 2                                              | 0.536 | 0.325 |
| PCBD1    | chr10:72643266-72648541   | pterin-4 alpha-carbinolamine dehydratase 1                                  | 0.712 | 0.455 |
| PCCA     | chr13:100740885-101241046 | propionyl-CoA carboxylase alpha subunit                                     | 0.352 | 0.326 |
| PCCB     | chr3:135969166-136049013  | propionyl-CoA carboxylase beta subunit                                      | 0.688 | 0.339 |
| PCDH1    | chr5:141230144-141258360  | protocadherin 1                                                             | 2.36  | 3.152 |
| PCK1     | chr20:56136136-56141513   | phosphoenolpyruvate carboxykinase 1                                         | 0.016 | 0.002 |
| PCSK6    | chr15:101836893-102034233 | proprotein convertase subtilisin/kexin type 6                               | 0.531 | 0.246 |
| PCSK9    | chr1:55505148-555681039   | proprotein convertase subtilisin/kexin type 9                               | 0.192 | 0.168 |
| PCYT2    | chr17:79849593-79869371   | phosphate cytidylyltransferase 2, ethanalamine                              | 0.465 | 0.361 |
| PDE10A   | chr6:165740775-166078096  | phosphodiesterase 10A                                                       | 1.568 | 2.502 |
| PDE11A   | chr2:178487976-178973066  | phosphodiesterase 11A                                                       | 0.673 | 0.203 |
| PDE1C    | chr7:31790860-32338408    | phosphodiesterase 1C                                                        | 5.455 | 7.279 |
| PDE5A    | chr4:120375937-120549981  | phosphodiesterase 5A                                                        | 2.212 | 2.364 |
| PDE7B    | chr6:136172833-136516709  | phosphodiesterase 7B                                                        | 0.43  | 0.184 |
| PDE8B    | chr5:76476152-76788332    | phosphodiesterase 8B                                                        | 0.249 | 0.189 |
| PDGFRB   | chr5:149493401-149535422  | platelet derived growth factor receptor beta                                | 3.003 | 8.886 |
| PDHX     | chr11:34896795-35017675   | pyruvate dehydrogenase complex component X                                  | 0.624 | 0.466 |
| PDK2     | chr17:48168199-48207246   | pyruvate dehydrogenase kinase 2                                             | 0.436 | 0.268 |
| PDK3     | chrX:24483343-24568583    | pyruvate dehydrogenase kinase 3                                             | 0.695 | 0.443 |
| PDLM2    | chr8:22436253-22461662    | PDZ and LIM domain 2                                                        | 0.189 | 0.12  |
| PDSS1    | chr0:26986594-27150016    | prenyl (decaprenyl) diphosphate synthase, subunit 1                         | 0.557 | 0.269 |
| PDZD3    | chr1:119056163-119060932  | PDZ domain containing 3                                                     | 0.202 | 0.021 |
| PDZK1    | chr1:145726914-145764206  | PDZ domain containing 1                                                     | 0.188 | 0.028 |
| PDZK1IP1 | chr1:47649260-47655964    | PDZK1 interacting protein 1                                                 | 0.364 | 0.11  |
| PEA15    | chr1:160172204-160232394  | phosphoprotein enriched in astrocytes 15                                    | 3.34  | 5.8   |
| PEAK1    | chr15:77400399-77712621   | pseudopodium enriched atypical kinase 1                                     | 1.905 | 3.256 |
| PEBP1    | chr12:118573869-118583390 | phosphatidylethanolamine binding protein 1                                  | 0.606 | 0.311 |
| PEG10    | chr7:94285636-94299008    | paternally expressed 10                                                     | 3.911 | 2.894 |
| PEPD     | chr19:33877854-34012799   | peptidase D                                                                 | 0.51  | 0.387 |
| PET112   | chr4:152330326-152682179  | glutamyl-tRNA(Gln) amidotransferase, subunit B                              | 0.619 | 0.432 |
| PEX11A   | chr15:90224761-90234015   | peroxisomal biogenesis factor 11 alpha                                      | 0.542 | 0.46  |
| PEX3     | chr6:143771917-143811751  | peroxisomal biogenesis factor 3                                             | 0.607 | 0.383 |
| PEX5     | chr12:7341758-7371169     | peroxisomal biogenesis factor 5                                             | 0.684 | 0.415 |
| PEX7     | chr6:137143701-137235072  | peroxisomal biogenesis factor 7                                             | 0.685 | 0.398 |
| PFKFB1   | chrX:54946995-55026317    | 6-phosphofructo-2-kinase/fructose-2,6-bisphosphatase 1                      | 0.259 | 0.145 |
| PFKM     | chr12:48436407-48540441   | phosphofructokinase, muscle                                                 | 0.7   | 0.431 |
| PGAP3    | chr17:37827374-37884977   | post-GPI attachment to proteins 3                                           | 0.598 | 0.363 |
| PGBD5    | chr1:230457391-230561674  | piggyBac transposable element derived 5                                     | 2.14  | 3.266 |
| PGC      | chr6:41704448-41715139    | progastrin (pepsinogen C)                                                   | 0.634 | 0.303 |
| PGLYRP2  | chr19:15579456-15591056   | peptidoglycan recognition protein 2                                         | 0.28  | 0.089 |
| PGM2L1   | chr1:174041360-74109510   | phosphoglucomutase 2-like 1                                                 | 3.058 | 3.804 |
| PGM3     | chr6:83777372-83908586    | phosphoglucomutase 3                                                        | 1.522 | 2.424 |
| PGM5     | chr9:70970108-71145977    | phosphoglucomutase 5                                                        | 0.558 | 0.362 |
| PHB      | chr17:47481419-47492246   | prohibitin                                                                  | 0.664 | 0.498 |
| PHB2     | chr12:7074514-7079916     | prohibitin 2                                                                | 0.584 | 0.451 |
| PHF17    | chr4:129730778-129796379  | jade family PHD finger 1                                                    | 0.554 | 0.465 |
| PHGDH    | chr1:120254418-120286849  | phosphoglycerate dehydrogenase                                              | 3.226 | 4.733 |
| PHKA2    | chrX:18908413-19003085    | phosphorylase kinase, alpha 2 (liver)                                       | 0.461 | 0.345 |
| PHKB     | chr16:47189273-47735440   | phosphorylase kinase beta subunit                                           | 0.631 | 0.447 |
| PHLDA1   | chr12:76419226-76425556   | pleckstrin homology like domain family A member 1                           | 5.284 | 7.611 |
| PHLDA2   | chr1:12949502-2950650     | pleckstrin homology like domain family A member 2                           | 2.496 | 3.386 |
| PHLDA3   | chr1:201434606-201438299  | pleckstrin homology like domain family A member 3                           | 1.744 | 2.969 |
| PHYHD1   | chr9:131683173-131704320  | phytanoyl-CoA dioxygenase domain containing 1                               | 0.422 | 0.205 |
| PI15     | chr8:75729565-75767264    | peptidase inhibitor 15                                                      | 0.633 | 0.398 |
| PI3      | chr20:43803539-43805185   | peptidase inhibitor 3                                                       | 0.299 | 0.105 |
| PIAS1    | chr15:68346571-68522080   | protein inhibitor of activated STAT 1                                       | 0.626 | 0.489 |
| PICK1    | chr22:38453261-38472114   | protein interacting with PRKCA 1                                            | 0.679 | 0.445 |
| PIEZO1   | chr16:88762902-88851618   | piezo type mechanosensitive ion channel component 1                         | 2.45  | 4.252 |
| PIEZO2   | chr18:10670184-11149596   | piezo type mechanosensitive ion channel component 2                         | 0.631 | 0.329 |
| PIGB     | chr15:55609259-55800432   | phosphatidylinositol glycan anchor biosynthesis class B                     | 0.407 | 0.219 |
| PIGK     | chr1:77554666-77685132    | phosphatidylinositol glycan anchor biosynthesis class K                     | 0.653 | 0.377 |
| PIGN     | chr18:59711457-59854313   | phosphatidylinositol glycan anchor biosynthesis class N                     | 0.607 | 0.418 |
| PIGR     | chr1:207101866-207119811  | polymeric immunoglobulin receptor                                           | 0.664 | 0.101 |
| PIK3AP1  | chr10:98353067-98480279   | phosphoinositide-3-kinase adaptor protein 1                                 | 0.328 | 0.18  |
| PIK3C2G  | chr12:18395539-18890993   | phosphatidylinositol-4-phosphate 3-kinase catalytic subunit type 2 gamma    | 0.194 | 0.004 |
| PIK3P1   | chr22:31677419-31688520   | phosphoinositide-3-kinase interacting protein 1                             | 0.694 | 0.383 |
| PIK3R2   | chr19:18263987-18281343   | phosphoinositide-3-kinase regulatory subunit 2                              | 1.649 | 2.249 |
| PIK3R3   | chr1:46505811-46598984    | phosphoinositide-3-kinase regulatory subunit 3                              | 2.717 | 4.708 |
| PI4      | chrX:71401199-71528334    | peptidylprolyl cis/trans isomerase, NIMA-interacting 4                      | 0.689 | 0.493 |
| PIP4K2A  | chr10:22823765-23003509   | phosphatidylinositol-5-phosphate 4-kinase type 2 alpha                      | 1.551 | 2.546 |
| PIPOX    | chr17:27280400-27384367   | pipecolic acid and sarcosine oxidase                                        | 0.159 | 0.029 |
| PITPNA   | chr17:1420212-1466110     | phosphatidylinositol transfer protein alpha                                 | 1.564 | 2.029 |
| PITPNC1  | chr17:65373396-65693379   | phosphatidylinositol transfer protein, cytoplasmic 1                        | 2.47  | 4.098 |
| PKD1     | chr16:2097989-2185899     | polycystin 1, transient receptor potential channel interacting              | 1.943 | 3.722 |
| PKD1P1   | chr16:16410664-16477549   | polycystin 1, transient receptor potential channel interacting pseudogene 1 | 1.702 | 2.485 |
| PKIA     | chr8:79428335-79517827    | protein kinase (cAMP-dependent, catalytic) inhibitor alpha                  | 2.04  | 2.752 |
| PKLR     | chr1:155247201-155271225  | pyruvate kinase, liver and RBC                                              | 0.214 | 0.17  |
| PKN3     | chr9:131464801-131486408  | protein kinase N3                                                           | 0.679 | 0.231 |

|          |                           |                                                                          |       |       |
|----------|---------------------------|--------------------------------------------------------------------------|-------|-------|
| PKP2     | chr12:32943679-33049780   | plakophilin 2                                                            | 0.524 | 0.277 |
| PLA1A    | chr3:119316694-119348658  | phospholipase A1 member A                                                | 0.661 | 0.158 |
| PLA2G12B | chr10:74694325-74714673   | phospholipase A2 group XIIB                                              | 0.059 | 0.009 |
| PLA2G15  | chr16:68278944-68294961   | phospholipase A2 group XV                                                | 1.289 | 2.245 |
| PLA2G16  | chr1:1:63334381-63381990  | phospholipase A2 group XVI                                               | 0.594 | 0.451 |
| PLA2G1B  | chr12:120759913-120765592 | phospholipase A2 group IB                                                | 0.41  | 0.001 |
| PLA2G2A  | chr1:20301923-20306932    | phospholipase A2 group IIA                                               | 0.854 | 0.346 |
| PLA2G4A  | chr1:186798031-186958113  | phospholipase A2 group IVA                                               | 0.49  | 0.242 |
| PLA2G4C  | chr19:48551099-48614109   | phospholipase A2 group IVC                                               | 1.708 | 2.136 |
| PLACBL1  | chr5:145463875-145483946  | PLACB-like 1                                                             | 1.296 | 3.425 |
| PLCB1    | chr20:8095207-8865547     | phospholipase C beta 1                                                   | 0.583 | 0.411 |
| PLCD3    | chr17:43189007-43229712   | phospholipase C delta 3                                                  | 1.486 | 2.478 |
| PLCXD3   | chr5:41307047-41510730    | phosphatidylinositol specific phospholipase C X domain containing 3      | 0.81  | 0.466 |
| PLD5     | chr1:242251385-242687998  | phospholipase D family member 5                                          | 3.677 | 8.174 |
| PLD6     | chr17:17104308-17109724   | phospholipase D family member 6                                          | 1.323 | 2.538 |
| PLEKHA6  | chr1:204187978-204347655  | pleckstrin homology domain containing A6                                 | 0.601 | 0.459 |
| PLEKHA7  | chr1:1:16798774-17036109  | pleckstrin homology domain containing A7                                 | 0.519 | 0.309 |
| PLEKHA8  | chr7:30067976-30157961    | pleckstrin homology domain containing A8                                 | 1.765 | 2.273 |
| PLEKHG1  | chr6:150920990-151164799  | pleckstrin homology and RhoGEF domain containing G1                      | 2.354 | 3.718 |
| PLEKHG5  | chr1:6484847-6580121      | pleckstrin homology and RhoGEF domain containing G5                      | 0.494 | 0.425 |
| PLEKHH1  | chr14:67999831-68067017   | pleckstrin homology, MyTH4 and FERM domain containing H1                 | 1.686 | 2.547 |
| PLEKHH2  | chr2:43864409-44001122    | pleckstrin homology, MyTH4 and FERM domain containing H2                 | 2.168 | 3.648 |
| PLG      | chr6:161123224-161175085  | plasminogen                                                              | 0.634 | 0.164 |
| PLGLB2   | chr2:88047605-88285309    | plasminogen-like B2                                                      | 0.133 | 0.063 |
| PLIN2    | chr9:19108423-19127604    | perilipin 2                                                              | 1.824 | 3.99  |
| PLIN3    | chr9:4838345-4867780      | perilipin 3                                                              | 0.561 | 0.452 |
| PLK3     | chr1:45266035-45452394    | polo like kinase 3                                                       | 1.714 | 2.674 |
| PLS1     | chr3:142315228-142432505  | plastin 1                                                                | 0.781 | 0.391 |
| PLS3     | chrX:114795176-114885179  | plastin 3                                                                | 0.69  | 0.403 |
| PLVAP    | chr19:17462263-17488694   | plasmalemma vesicle associated protein                                   | 1.249 | 2.445 |
| PLXNA1   | chr3:126701928-126756235  | plexin A1                                                                | 3.064 | 4.92  |
| PLXNA2   | chr1:208195587-208417760  | plexin A2                                                                | 1.795 | 2.373 |
| PLXNA3   | chrX:153886505-153703594  | plexin A3                                                                | 3.483 | 5.808 |
| PLXNB1   | chr3:48444792-48471785    | plexin B1                                                                | 0.508 | 0.296 |
| PLXNC1   | chr12:94519704-94853764   | plexin C1                                                                | 0.632 | 0.347 |
| PMAIP1   | chr8:57567191-57571538    | phorbol-12-myristate-13-acetate-induced protein 1                        | 4.868 | 7.613 |
| PMCHL2   | chr5:70648324-70741726    | pro-melanin concentrating hormone like 2 (pseudogene)                    | 0.253 | 0.01  |
| PMEPA1   | chr20:56223447-56286592   | prostate transmembrane protein, androgen induced 1                       | 4.545 | 14.45 |
| PNKD     | chr2:219135114-219211516  | paroxysmal nonkinetogenic dyskinesia                                     | 0.534 | 0.323 |
| PNMA1    | chr14:74178485-74181128   | paraneoplastic Ma antigen 1                                              | 2.266 | 3.692 |
| PNPLA3   | chr22:44319614-44347393   | patatin like phospholipase domain containing 3                           | 0.352 | 0.205 |
| PNPLA7   | chr9:140354404-140445159  | patatin like phospholipase domain containing 7                           | 0.498 | 0.384 |
| PNPO     | chr17:46018888-46026674   | pyridoxamine 5'-phosphate oxidase                                        | 0.563 | 0.425 |
| PODXL    | chr7:131185020-131241376  | podocalyxin like                                                         | 2.477 | 4.677 |
| POLE2    | chr14:50110269-50155098   | polymerase (DNA) epsilon 2, accessory subunit                            | 0.789 | 0.089 |
| POLE4    | chr2:75150546-75196859    | polymerase (DNA) epsilon 4, accessory subunit                            | 1.862 | 2.189 |
| POLG     | chr15:89787193-89878078   | polymerase (DNA) gamma, catalytic subunit                                | 1.632 | 2.099 |
| PON1     | chr7:94927668-94953884    | paraoxonase 1                                                            | 0.294 | 0.069 |
| PON2     | chr7:94989022-95064386    | paraoxonase 2                                                            | 0.496 | 0.223 |
| PON3     | chr7:94989022-95064386    | paraoxonase 3                                                            | 0.658 | 0.383 |
| POP1     | chr8:99129520-99197727    | POP1 homolog, ribonuclease P/MRP subunit                                 | 0.498 | 0.202 |
| POPDC2   | chr3:119360907-119379404  | popeye domain containing 2                                               | 2.846 | 5.346 |
| POSTN    | chr13:38136718-38172981   | periostin, osteoblast specific factor                                    | 0.263 | 0.263 |
| POU3F3   | chr2:105421882-105475008  | POU class 3 homeobox 3                                                   | 0.614 | 0.387 |
| POU5F1   | chr6:31132113-31138451    | POU class 5 homeobox 1                                                   | 0.478 | 0.252 |
| PPA2     | chr4:106290233-106395267  | pyrophosphatase (inorganic) 2                                            | 0.622 | 0.412 |
| PPAP2B   | chr1:56960418-57045257    | phospholipid phosphatase 3                                               | 0.472 | 0.345 |
| PPARD    | chr6:35310329-35395968    | peroxisome proliferator activated receptor delta                         | 1.744 | 2.613 |
| PPARG    | chr3:12329348-12512396    | peroxisome proliferator activated receptor gamma                         | 1.65  | 2.048 |
| PPARGC1A | chr4:23793622-23891700    | PPARG coactivator 1 alpha                                                | 0.303 | 0.255 |
| PPARGC1B | chr5:149109814-149234585  | PPARG coactivator 1 beta                                                 | 0.578 | 0.416 |
| PPCS     | chr1:42922172-42926086    | phosphopantothencycysteine synthetase                                    | 0.647 | 0.448 |
| PPDPF    | chr20:62152121-62168882   | pancreatic progenitor cell differentiation and proliferation factor      | 1.703 | 2.255 |
| PPFIA1   | chr11:70116805-70230607   | PTPRF interacting protein alpha 1                                        | 1.685 | 2.874 |
| PPIG     | chr2:170440608-170497917  | peptidylprolyl isomerase G                                               | 0.729 | 0.492 |
| PPIL6    | chr6:109711417-109777399  | peptidylprolyl isomerase like 6                                          | 2.966 | 4.316 |
| PPM1E    | chr17:56833229-57184266   | protein phosphatase, Mg2+/Mn2+ dependent 1E                              | 4.244 | 6.885 |
| PPM1J    | chr1:113252227-113257950  | protein phosphatase, Mg2+/Mn2+ dependent 1J                              | 2.637 | 3.217 |
| PPM1L    | chr3:160470433-160797016  | protein phosphatase, Mg2+/Mn2+ dependent 1L                              | 1.497 | 2.537 |
| PPP1R14C | chr6:150464187-150571528  | protein phosphatase 1 regulatory inhibitor subunit 14C                   | 2.757 | 3.146 |
| PPP1R14D | chr15:41107642-41120907   | protein phosphatase 1 regulatory inhibitor subunit 14D                   | 0.172 | 0.018 |
| PPP1R15A | chr19:49375648-49379319   | protein phosphatase 1 regulatory subunit 15A                             | 6.704 | 16.72 |
| PPP1R16A | chr8:145703320-145728924  | protein phosphatase 1 regulatory subunit 16A                             | 0.403 | 0.317 |
| PPP1R1A  | chr12:54973023-54982443   | protein phosphatase 1 regulatory inhibitor subunit 1A                    | 0.41  | 0.448 |
| PPP1R1C  | chr2:182818967-182996109  | protein phosphatase 1 regulatory inhibitor subunit 1C                    | 0.344 | 0.169 |
| PPP1R3B  | chr8:8993763-9009152      | protein phosphatase 1 regulatory subunit 3B                              | 0.427 | 0.482 |
| PPP1R3F  | chrX:49126305-49144648    | protein phosphatase 1 regulatory subunit 3F                              | 1.381 | 2.051 |
| PPP1R7   | chr2:242045468-242123064  | protein phosphatase 1 regulatory subunit 7                               | 0.539 | 0.376 |
| PPP2R4   | chr9:131873227-131911404  | protein phosphatase 2A regulatory subunit 4                              | 0.61  | 0.458 |
| PQLC2    | chr1:19638739-19655856    | PQ loop repeat containing 2                                              | 1.682 | 2.231 |
| PRCD     | chr17:74523429-74553748   | progressive rod-cone degeneration                                        | 0.2   | 0.252 |
| PRDM10   | chr11:129769497-129875381 | PR domain 10                                                             | 0.753 | 0.438 |
| PRDM16   | chr1:2985576-3355185      | PR domain 16                                                             | 5.356 | 9.46  |
| PRDM2    | chr1:14026734-14151574    | PR domain 2                                                              | 1.579 | 2.461 |
| PRDM4    | chr12:108126642-108154980 | PR domain 4                                                              | 1.742 | 2.806 |
| PRDX2    | chr9:12907633-12912694    | peroxiredoxin 2                                                          | 0.76  | 0.41  |
| PRDX3    | chr10:120927214-120938345 | peroxiredoxin 3                                                          | 0.716 | 0.454 |
| PREX2    | chr8:68864602-69146468    | phosphatidylinositol-3,4,5-trisphosphate dependent Rac exchange factor 2 | 0.517 | 0.268 |
| PRG4     | chr1:185703497-186446655  | proteoglycan 4                                                           | 0.689 | 0.165 |
| PRICKLE1 | chr12:42851031-42983572   | prickle planar cell polarity protein 1                                   | 1.542 | 2.223 |
| PRICKLE2 | chr3:64053639-64253822    | prickle planar cell polarity protein 2                                   | 0.565 | 0.45  |
| PRKAG2   | chr7:151253200-151576308  | protein kinase AMP-activated non-catalytic subunit gamma 2               | 0.263 | 0.27  |
| PRKAR2B  | chr7:106685177-106802256  | protein kinase cAMP-dependent type II regulatory subunit beta            | 0.146 | 0.095 |
| PRKCA    | chr17:64298734-64806862   | protein kinase C alpha                                                   | 1.997 | 3.37  |
| PRLR     | chr5:35048860-35231055    | prolactin receptor                                                       | 0.43  | 0.341 |
| PRMT2    | chr21:48055506-48085155   | protein arginine methyltransferase 2                                     | 2.013 | 3.053 |
| PRNP     | chr20:4666796-4682234     | prion protein                                                            | 2.365 | 3.481 |
| PRODH    | chr22:18892275-18924066   | proline dehydrogenase 1                                                  | 0.228 | 0.221 |
| PRODH2   | chr19:36283214-36304201   | proline dehydrogenase 2                                                  | 0.303 | 0.058 |
| PROS1    | chr3:93591880-93692934    | protein S (alpha)                                                        | 0.577 | 0.445 |
| PROSER1  | chr13:39584001-39612213   | proline and serine rich 1                                                | 1.581 | 2.167 |
| PROX1    | chr1:214161163-214214847  | prospero homeobox 1                                                      | 0.38  | 0.164 |
| PRRC2B   | chr9:134269379-134375802  | proline rich coiled-coil 2B                                              | 1.61  | 2.406 |



|          |                           |                                                                 |       |       |
|----------|---------------------------|-----------------------------------------------------------------|-------|-------|
| PRRG4    | chr1:32851350-32879669    | proline rich and Gla domain 4                                   | 0.763 | 0.239 |
| PRUNE2   | chr9:79226291-79521056    | prune homolog 2 (Drosophila)                                    | 1.419 | 2.095 |
| PRX      | chr19:4089670-40919271    | periaxin                                                        | 2.072 | 3.41  |
| PSAT1    | chr9:80912058-80945009    | phosphoserine aminotransferase 1                                | 10.07 | 17.65 |
| PSCA     | chr8:143738566-143764145  | prostate stem cell antigen                                      | 0.591 | 0.32  |
| PSD3     | chr8:18384812-18871204    | pleckstrin and Sec7 domain containing 3                         | 2.144 | 3.748 |
| PSD4     | chr2:113915020-113962516  | pleckstrin and Sec7 domain containing 4                         | 0.651 | 0.347 |
| PSMB1    | chr6:170844203-170863248  | proteasome subunit beta 1                                       | 0.663 | 0.487 |
| PSMB10   | chr16:67966395-67970780   | proteasome subunit beta 10                                      | 0.553 | 0.345 |
| PSORS1C3 | chr6:31139415-31149542    | psoriasis susceptibility 1 candidate 3 (non-protein coding)     | 0.458 | 0.2   |
| PSPH     | chr7:56077890-56119268    | phosphoserine phosphatase                                       | 2.04  | 2.566 |
| PSRC1    | chr1:109822175-109825821  | proline and serine rich coiled-coil 1                           | 0.445 | 0.391 |
| PSTPIP2  | chr18:43563501-43652399   | proline-serine-threonine phosphatase interacting protein 2      | 0.547 | 0.24  |
| PTCD3    | chr2:86333304-86369359    | pentatricopeptide repeat domain 3                               | 0.609 | 0.427 |
| PTCHD3P1 | chr10:29469247-29717029   | patched domain containing 3 pseudogene 1                        | 1.602 | 2.237 |
| PTCHD4   | chr6:47824556-48078994    | patched domain containing 4                                     | 0.383 | 0.383 |
| PTGR1    | chr9:114287446-114362135  | prostaglandin reductase 1                                       | 0.332 | 0.079 |
| PTHLH    | chr12:28111016-28124916   | parathyroid hormone-like hormone                                | 4.145 | 4.632 |
| PTPLAD1  | chr15:65822800-65870695   | 3-hydroxyacyl-CoA dehydratase 3                                 | 0.838 | 0.489 |
| PTPN12   | chr7:77166772-77269388    | protein tyrosine phosphatase, non-receptor type 12              | 2.074 | 2.876 |
| PTPN14   | chr1:214522038-214725401  | protein tyrosine phosphatase, non-receptor type 14              | 1.683 | 2.622 |
| PTPN3    | chr9:112137781-112260593  | protein tyrosine phosphatase, non-receptor type 3               | 0.95  | 0.376 |
| PTPN6    | chr12:7055596-7070479     | protein tyrosine phosphatase, non-receptor type 6               | 0.619 | 0.26  |
| PTPRJ    | chr11:48002109-48192394   | protein tyrosine phosphatase, receptor type J                   | 1.77  | 2.823 |
| PTPRN2   | chr7:157331748-158380482  | protein tyrosine phosphatase, receptor type N2                  | 0.537 | 0.288 |
| PTPRQ    | chr12:80837614-81073968   | protein tyrosine phosphatase, receptor type Q                   | 0.154 | 0.128 |
| PTX3     | chr3:156977531-157221415  | pentraxin 3                                                     | 3.279 | 7.633 |
| PUS10    | chr2:61108627-61365169    | pseudouridylate synthase 10                                     | 0.26  | 0.175 |
| PUS7     | chr7:105096588-105162722  | pseudouridylate synthase 7 (putative)                           | 1.907 | 2.437 |
| PVRL1    | chr1:119508807-119599435  | nectin cell adhesion molecule 1                                 | 2.574 | 4.456 |
| PXK      | chr3:58318611-58413032    | PX domain containing serine/threonine kinase like               | 1.654 | 2.159 |
| PXMP2    | chr12:133264012-133281577 | peroxisomal membrane protein 2                                  | 0.551 | 0.295 |
| QDPR     | chr4:17488015-17513857    | quinoid dihydropteridine reductase                              | 0.654 | 0.388 |
| QPRT     | chr16:29690237-29710022   | quinolate phosphoribosyltransferase                             | 0.233 | 0.126 |
| RAB17    | chr2:238482962-238500223  | RAB17, member RAS oncogene family                               | 0.237 | 0.042 |
| RAB20    | chr1:3111173300-111214125 | RAB20, member RAS oncogene family                               | 0.643 | 0.445 |
| RAB23    | chr6:56954807-57087083    | RAB23, member RAS oncogene family                               | 1.748 | 2.307 |
| RAB37    | chr17:72667255-72743474   | RAB37, member RAS oncogene family                               | 0.341 | 0.245 |
| RAB3L1   | chr1:61664767-61687741    | RAB3A interacting protein like 1                                | 2.617 | 4.209 |
| RAB8A    | chr19:16222489-16244445   | RAB8A, member RAS oncogene family                               | 0.572 | 0.383 |
| RABEPK   | chr9:127962779-127996438  | Rab9 effector protein with kelch motifs                         | 0.494 | 0.435 |
| RABL3    | chr3:120405517-120461384  | RAB, member of RAS oncogene family like 3                       | 0.47  | 0.324 |
| RAD51AP1 | chr12:4647949-4669213     | RAD51 associated protein 1                                      | 0.892 | 0.134 |
| RALGPS1  | chr9:129677052-129985445  | Ral GEF with PH domain and SH3 binding motif 1                  | 1.298 | 2.162 |
| RALY     | chr20:32581299-32700091   | RALY heterogeneous nuclear ribonucleoprotein                    | 1.57  | 2.39  |
| RANBP1   | chr22:20105023-20114877   | RAN binding protein 1                                           | 0.749 | 0.39  |
| RANGAP1  | chr22:41641614-41682216   | Ran GTPase activating protein 1                                 | 1.846 | 2.552 |
| RAP1GAP2 | chr17:2699731-2941036     | RAP1 GTPase activating protein 2                                | 2.797 | 4.047 |
| RAP2A    | chr13:98077191-98120252   | RAP2A, member of RAS oncogene family                            | 1.806 | 2.009 |
| RAPGEF1  | chr9:134431362-134615264  | Rap guanine nucleotide exchange factor 1                        | 2.057 | 2.972 |
| RAPGEF4  | chr2:173587917-173917620  | Rap guanine nucleotide exchange factor 4                        | 0.425 | 0.193 |
| RAPH1    | chr2:204298359-204400058  | Ras association (RalGDS/AF-6) and pleckstrin homology domains 1 | 2.303 | 3.971 |
| RARRS1   | chr3:158414771-158450499  | retinoic acid receptor responder 1                              | 0.581 | 0.256 |
| RARRS3   | chr11:63014620-63330855   | retinoic acid receptor responder 3                              | 0.547 | 0.215 |
| RASA4    | chr7:102220092-102257205  | RAS p21 protein activator 4                                     | 1.224 | 2.479 |
| RASD1    | chr17:17397752-17399709   | ras related dexamethasone induced 1                             | 10.77 | 12.52 |
| RASD2    | chr22:35937351-35950045   | RASD family member 2                                            | 3.061 | 6.808 |
| RASSF1   | chr3:50367216-50378367    | Ras association domain family member 1                          | 1.651 | 2.757 |
| RASSF4   | chr10:45306471-45490173   | Ras association domain family member 4                          | 0.58  | 0.298 |
| RASSF6   | chr4:74437266-74486348    | Ras association domain family member 6                          | 0.874 | 0.196 |
| RASSF7   | chr1:1532198-564025       | Ras association domain family member 7                          | 0.641 | 0.442 |
| RASSF8   | chr12:26097760-26232825   | Ras association domain family member 8                          | 1.447 | 2.211 |
| RASSF9   | chr12:86107052-86276770   | Ras association domain family member 9                          | 0.555 | 0.246 |
| RBCK1    | chr20:388683-412762       | RANBP2-type and C3HC4-type zinc finger containing 1             | 1.735 | 2.484 |
| RBKS     | chr2:28004265-28561767    | ribokinase                                                      | 0.352 | 0.201 |
| RBL2     | chr16:53468350-53537170   | retinoblastoma-like 2                                           | 0.555 | 0.371 |
| RBM38    | chr20:55904830-55998278   | RNA binding motif protein 38                                    | 2.006 | 2.536 |
| RBM45    | chr2:178977159-179003552  | RNA binding motif protein 45                                    | 0.662 | 0.403 |
| RBM47    | chr4:40425271-40632519    | RNA binding motif protein 47                                    | 0.323 | 0.15  |
| RBM6     | chr3:49946301-50114685    | RNA binding motif protein 6                                     | 1.4   | 2.03  |
| RBMS3    | chr3:29322679-30051886    | RNA binding motif single stranded interacting protein 3         | 0.435 | 0.327 |
| RBP1     | chr3:139236275-139258671  | retinol binding protein 1                                       | 0.949 | 0.291 |
| RBP4     | chr10:95351592-95360993   | retinol binding protein 4                                       | 0.715 | 0.155 |
| RBP5     | chr12:7247145-7311530     | retinol binding protein 5                                       | 0.172 | 0.056 |
| RCAN2    | chr6:46188466-46459804    | regulator of calcineurin 2                                      | 2.303 | 2.84  |
| RCC1     | chr1:28832454-28870516    | regulator of chromosome condensation 1                          | 2.04  | 3.049 |
| RCN1     | chr1:32110308-32127272    | reticulocalbin 1                                                | 1.675 | 2.261 |
| RCN3     | chr19:50030062-50046890   | reticulocalbin 3                                                | 0.169 | 0.066 |
| RCOR1    | chr14:103058973-103196913 | REST corepressor 1                                              | 1.662 | 2.429 |
| RDH16    | chr12:57345215-57351418   | retinol dehydrogenase 16 (all-trans)                            | 0.072 | 0.069 |
| RELB     | chr19:45504706-45541645   | RELB proto-oncogene, NF-kB subunit                              | 2.393 | 4.541 |
| RELL2    | chr5:141016511-141030986  | RELT like 2                                                     | 2.631 | 3.507 |
| RELT     | chr11:73087404-73108903   | RELT tumor necrosis factor receptor                             | 4.532 | 8.136 |
| RFESD    | chr5:94982456-95018714    | Rieske Fe-S domain containing                                   | 1.856 | 2.587 |
| RFK      | chr9:79000432-79009456    | riboflavin kinase                                               | 1.721 | 2.808 |
| RFX2     | chr9:5978413-6110664      | regulatory factor X2                                            | 5.833 | 15.26 |
| RFX3     | chr9:3218379-3525989      | regulatory factor X3                                            | 1.797 | 2.405 |
| RFX5     | chr1:151313114-151319769  | regulatory factor X5                                            | 0.739 | 0.419 |
| RGMB     | chr5:98104998-98132198    | repulsive guidance molecule family member b                     | 1.848 | 3.033 |
| RGN      | chrX:46937595-46953067    | regucalcin                                                      | 0.225 | 0.039 |
| RGPD1    | chr2:88047605-88285309    | RANBP2-like and GRIP domain containing 5                        | 0.18  | 0.022 |
| RGS14    | chr5:176784654-176799599  | regulator of G-protein signaling 14                             | 0.496 | 0.405 |
| RGS16    | chr1:182567757-182573548  | regulator of G-protein signaling 16                             | 6.437 | 21.48 |
| RGS3     | chr9:116207008-116360023  | regulator of G-protein signaling 3                              | 0.577 | 0.302 |
| RHBDD1   | chr2:227700670-228179508  | rhomboïd domain containing 1                                    | 1.73  | 2.411 |
| RHBDD2   | chr7:75508316-75518244    | rhomboïd domain containing 2                                    | 1.942 | 2.666 |
| RHCE     | chr1:25664788-25747363    | Rh blood group D antigen                                        | 2.231 | 3.452 |
| RHEBL1   | chr12:49458467-49463775   | Ras homolog enriched in brain like 1                            | 5.031 | 11.02 |
| RHOBTB2  | chr8:22844929-22941132    | Rho related BTB domain containing 2                             | 1.553 | 3.246 |
| RIC3     | chr1:18060179-8190590     | RIC3 acetylcholine receptor chaperone                           | 0.577 | 0.352 |
| RILPL2   | chr12:123894638-123921494 | Rab interacting lysosomal protein like 2                        | 0.621 | 0.49  |
| RIMS3    | chr1:41086351-41131324    | regulating synaptic membrane exocytosis 3                       | 1.624 | 2.333 |
| RIN2     | chr20:19780289-19983103   | Ras and Rab interactor 2                                        | 0.443 | 0.361 |

|           |                           |                                                               |       |        |
|-----------|---------------------------|---------------------------------------------------------------|-------|--------|
| RMDN2     | chr2:38152332-38294285    | regulator of microtubule dynamics 2                           | 0.501 | 0.364  |
| RND1      | chr12:49250915-49259653   | Rho family GTPase 1                                           | 1.087 | 0.409  |
| RND3      | chr2:151324706-151344209  | Rho family GTPase 3                                           | 2.805 | 3.616  |
| RNF122    | chr8:33405272-33424643    | ring finger protein 122                                       | 2.159 | 4.324  |
| RNF125    | chr18:29598440-29653154   | ring finger protein 125, E3 ubiquitin protein ligase          | 0.585 | 0.386  |
| RNF128    | chrX:105937067-106040246  | ring finger protein 128, E3 ubiquitin protein ligase          | 0.766 | 0.45   |
| RNF165    | chr18:43914186-44043090   | ring finger protein 165                                       | 1.371 | 2.403  |
| RNF187    | chr1:228674580-228686224  | ring finger protein 187                                       | 2.201 | 3.018  |
| RNF19B    | chr1:33399716-33430491    | ring finger protein 19B                                       | 2.127 | 3.133  |
| RNF24     | chr20:3827445-3996294     | ring finger protein 24                                        | 3.128 | 5.382  |
| RNF43     | chr17:56378587-56494931   | ring finger protein 43                                        | 0.312 | 0.109  |
| RNF5      | chr6:32146161-32148570    | ring finger protein 5                                         | 0.431 | 0.218  |
| RNPS1     | chr16:2303086-2318451     | RNA binding protein with serine rich domain 1                 | 1.545 | 2.235  |
| ROBO1     | chr3:78646251-79817059    | roundabout guidance receptor 1                                | 2.017 | 3.156  |
| ROBO2     | chr3:77089293-77699114    | roundabout guidance receptor 2                                | 1.993 | 3.444  |
| ROGDI     | chr16:4846962-4852951     | rogdi homolog                                                 | 1.676 | 2.157  |
| ROR2      | chr9:94484821-94712444    | receptor tyrosine kinase like orphan receptor 2               | 1.401 | 2.173  |
| RORC      | chr1:151778546-151826173  | RAR related orphan receptor C                                 | 0.178 | 0.073  |
| ROS1      | chr6:117608513-117747520  | ROS proto-oncogene 1, receptor tyrosine kinase                | 0.535 | 0.317  |
| RP9P      | chr7:32956042-32983010    | retinitis pigmentosa 9 pseudogene                             | 2.198 | 3.213  |
| RPH3AL    | chr17:54477-236030        | rabphilin 3A-like (without C2 domains)                        | 0.625 | 0.268  |
| RPL23AP64 | chr11:118868851-118889057 | ribosomal protein L23a pseudogene 64                          | 0.607 | 0.398  |
| RPL28     | chr19:55895922-55919325   | ribosomal protein L28                                         | 1.449 | 2.169  |
| RPL36     | chr19:5690271-5691678     | ribosomal protein L36                                         | 1.543 | 2.341  |
| RPP25     | chr15:75247442-75249775   | ribonuclease P/MRP subunit p25                                | 1.608 | 2.247  |
| RPS6KA2   | chr6:166822853-167275771  | ribosomal protein S6 kinase A2                                | 2.15  | 3.92   |
| RRAD      | chr16:66955581-66959439   | Ras-related associated with diabetes                          | 3.807 | 3.933  |
| RRM1      | chr1:4115923-4160106      | ribonucleotide reductase catalytic subunit M1                 | 0.74  | 0.266  |
| RRM2      | chr2:10260965-10271546    | ribonucleotide reductase regulatory subunit M2                | 0.566 | 0.023  |
| RRP7A     | chr22:42896584-42915829   | ribosomal RNA processing 7 homolog A                          | 1.75  | 3.081  |
| RSPH3     | chr6:159309618-159421848  | radial spoke 3 homolog                                        | 1.468 | 2.291  |
| RTKL1     | chr20:62289162-62370906   | regulator of telomere elongation helicase 1                   | 0.865 | 0.437  |
| RTN2      | chr19:45988144-46030240   | reticulum 2                                                   | 2.935 | 4.88   |
| RTN3      | chr11:63448921-63527363   | reticulum 3                                                   | 1.632 | 2.029  |
| RTN4      | chr2:55199321-55277734    | reticulum 4                                                   | 1.605 | 2.322  |
| RTN4IP1   | chr6:106959632-107077374  | reticulum 4 interacting protein 1                             | 0.474 | 0.238  |
| RTN4R     | chr22:20228937-20255816   | reticulum 4 receptor                                          | 2.39  | 5.367  |
| RTP4      | chr3:187086167-187089369  | receptor (chemosensory) transporter protein 4                 | 0.198 | 0.048  |
| RUNDC3A   | chr17:42367721-42396038   | RUN domain containing 3A                                      | 1.545 | 2.759  |
| RUNX1     | chr21:36160097-36421595   | runt related transcription factor 1                           | 2.383 | 3.969  |
| RUNX2     | chr6:44776944-4518819     | runt related transcription factor 2                           | 1.851 | 2.415  |
| RUSC2     | chr9:35489318-35563896    | RUN and SH3 domain containing 2                               | 2.288 | 3.276  |
| RXRA      | chr9:137218315-137332571  | retinoid X receptor alpha                                     | 0.586 | 0.431  |
| RYBP      | chr3:72423743-72495774    | RING1 and YY1 binding protein                                 | 2.279 | 4.598  |
| S100A11   | chr1:152004981-152009511  | S100 calcium binding protein A11                              | 1.99  | 3.071  |
| S100A2    | chr1:153533584-153538306  | S100 calcium binding protein A2                               | 0.314 | 0.243  |
| S100A3    | chr1:153519808-153521734  | S100 calcium binding protein A3                               | 0.35  | 0.115  |
| S100A4    | chr1:153516094-153518282  | S100 calcium binding protein A4                               | 0.698 | 0.468  |
| S100A8    | chr1:153362507-153363664  | S100 calcium binding protein A8                               | 0.385 | 0.316  |
| SAA1      | chr1:18287807-18291523    | serum amyloid A1                                              | 0.478 | 0.155  |
| SAA2      | chr1:18252901-18270221    | serum amyloid A2                                              | 0.431 | 0.192  |
| SACS      | chr13:23902876-24007841   | sacsin molecular chaperone                                    | 2.543 | 3.996  |
| SALL1     | chr16:51169885-51186152   | spalt-like transcription factor 1                             | 0.603 | 0.46   |
| SAMD4A    | chr14:55032697-55260033   | sterile alpha motif domain containing 4A                      | 1.878 | 2.356  |
| SAMD4B    | chr19:39833107-39891204   | sterile alpha motif domain containing 4B                      | 1.55  | 2.816  |
| SAMM50    | chr22:44351260-44392412   | SAMM50 sorting and assembly machinery component               | 0.407 | 0.239  |
| SARDH     | chr9:136526468-136605077  | sarcosine dehydrogenase                                       | 0.096 | 0.035  |
| SARS      | chr1:109756514-109780804  | seryl-tRNA synthetase                                         | 1.856 | 2.222  |
| SARS2     | chr19:39405903-39423659   | seryl-tRNA synthetase 2, mitochondrial                        | 0.663 | 0.304  |
| SASS6     | chr1:100549101-100598511  | SAS-6 centriolar assembly protein                             | 1.063 | 0.494  |
| SAT1      | chrX:23801274-23804327    | spermidine/spermine N1-acetyltransferase 1                    | 2.089 | 2.906  |
| SCFD2     | chr4:53656160-54232242    | sec1 family domain containing 2                               | 0.494 | 0.196  |
| SCG5      | chr15:32933869-32989298   | secretogranin V                                               | 1.906 | 2.617  |
| SCGB1D2   | chr11:62009723-62012280   | secretoglobulin, family 1D member 2                           | 0.447 | 0.139  |
| SCGN      | chr6:25652428-25702011    | secretagogin, EF-hand calcium binding protein                 | 0.281 | 0.033  |
| SCN3B     | chr1:123499894-123525315  | sodium voltage-gated channel beta subunit 3                   | 4.288 | 9.694  |
| SCN9A     | chr2:167051696-167232497  | sodium voltage-gated channel alpha subunit 9                  | 1.627 | 2.108  |
| SCNN1A    | chr12:6454433-6500737     | sodium channel epithelial 1 alpha subunit                     | 0.432 | 0.301  |
| SCP2      | chr1:53392900-53517289    | sterol carrier protein 2                                      | 0.332 | 0.142  |
| SCRN3     | chr2:175212877-175295175  | secernin 3                                                    | 0.597 | 0.421  |
| CTR       | chr2:120189407-120282028  | secretin receptor                                             | 0.242 | 0.072  |
| SDC1      | chr2:20400553-20425194    | syndecan 1                                                    | 0.536 | 0.38   |
| SDCCAG3   | chr9:139296373-139305054  | serologically defined colon cancer antigen 3                  | 1.545 | 2.473  |
| SDHA      | chr5:218355-256814        | succinate dehydrogenase complex flavoprotein subunit A        | 0.75  | 0.395  |
| SDHB      | chr1:17345224-17380665    | succinate dehydrogenase complex iron sulfur subunit B         | 0.609 | 0.414  |
| SDHC      | chr1:161284165-161340702  | succinate dehydrogenase complex subunit C                     | 0.652 | 0.413  |
| SDHD      | chr1:111957570-111966518  | succinate dehydrogenase complex subunit D                     | 0.574 | 0.43   |
| SDK1      | chr7:3341079-4308631      | sidekick cell adhesion molecule 1                             | 0.144 | 0.011  |
| SDPR      | chr2:192699031-192712006  | serum deprivation response                                    | 0.352 | 0.086  |
| SDS       | chr12:113830250-113841738 | serine dehydratase                                            | 0.403 | 0.072  |
| SDSL      | chr12:113860039-113876096 | serine dehydratase like                                       | 0.81  | 0.452  |
| SEC16B    | chr1:177897800-177942446  | SEC16 homolog B, endoplasmic reticulum export factor          | 0.295 | 0.073  |
| SEC23A    | chr14:39501122-39572538   | Sec23 homolog A, coat complex II component                    | 0.491 | 0.324  |
| SEC61A1   | chr3:127771211-127790526  | Sec61 translocon alpha 1 subunit                              | 1.611 | 2.457  |
| SELENBP1  | chr1:151336776-151345210  | selenium binding protein 1                                    | 0.258 | 0.094  |
| SELL      | chr1:169659805-169681113  | selectin L                                                    | 0.308 | 0.092  |
| SELPLG    | chr12:109015679-109030486 | selectin P ligand                                             | 5.462 | 15.41  |
| SELRC1    | chr1:53150053-53174145    | cytochrome c oxidase assembly factor 7 (putative)             | 0.601 | 0.379  |
| SEMA3C    | chr7:80371853-80548667    | semaphorin 3C                                                 | 1.396 | 2.584  |
| SEMA3E    | chr7:82992353-83278479    | semaphorin 3E                                                 | 0.535 | 0.414  |
| SEMA3F    | chr3:50192509-50235129    | semaphorin 3F                                                 | 0.076 | 0.2791 |
| SEMA4B    | chr15:90727951-90772892   | semaphorin 4B                                                 | 0.466 | 0.327  |
| SEMA4C    | chr2:97525472-97535735    | semaphorin 4C                                                 | 0.561 | 0.421  |
| SEMA4G    | chr10:102729256-102747272 | semaphorin 4G                                                 | 0.237 | 0.122  |
| SENPT7    | chr3:101043117-101232251  | SUMO1/sentrin specific peptidase 7                            | 0.591 | 0.335  |
| SEPP1     | chr5:42756919-42812024    | selenoprotein P, plasma, 1                                    | 0.372 | 0.189  |
| SEPSECS   | chr4:25121626-25162266    | Sep (O-phosphoserine) tRNA:Sec (selenocysteine) tRNA synthase | 0.633 | 0.443  |
| SEPT4     | chr17:56597610-56618179   | septin 4                                                      | 0.294 | 0.245  |
| SEPT6     | chrX:118749687-118827333  | septin 6                                                      | 0.501 | 0.388  |
| SERAC1    | chr6:158530477-158589312  | serine active site containing 1                               | 1.784 | 2.263  |
| SERP1     | chr3:150259779-150321006  | stress-associated endoplasmic reticulum protein 1             | 1.624 | 2.591  |
| SERPINA1  | chr14:94843083-94857029   | serpin family A member 1                                      | 0.715 | 0.186  |
| SERPINA10 | chr14:94640633-94763483   | serpin family A member 10                                     | 0.089 | 0.016  |

|            |                           |                                                                    |       |       |
|------------|---------------------------|--------------------------------------------------------------------|-------|-------|
| SERPINA3   | chr14:95078643-95090395   | serpin family A member 3                                           | 0.472 | 0.104 |
| SERPINA4   | chr14:95027771-95036243   | serpin family A member 4                                           | 0.442 | 0.075 |
| SERPINA5   | chr14:95047705-95065282   | serpin family A member 5                                           | 0.363 | 0.236 |
| SERPINA6   | chr14:94770584-94789693   | serpin family A member 6                                           | 0.382 | 0.056 |
| SERPINA7   | chrX:105259681-105282739  | serpin family A member 7                                           | 0.232 | 0.047 |
| SERPINB8   | chr18:61637262-61656608   | serpin family B member 8                                           | 1.678 | 2.275 |
| SERPINC1   | chr1:173872941-173886516  | serpin family C member 1                                           | 0.682 | 0.148 |
| SERPIND1   | chr22:21061976-21245501   | serpin family D member 1                                           | 0.413 | 0.096 |
| SERPINE1   | chr7:100770369-100782547  | serpin family E member 1                                           | 11.05 | 30.46 |
| SERPINE2   | chr2:224839764-224904036  | serpin family E member 2                                           | 4.966 | 6.533 |
| SERPINF1   | chr17:1665258-1681250     | serpin family F member 1                                           | 0.651 | 0.216 |
| SERPINF2   | chr17:1646129-1658559     | serpin family F member 2                                           | 0.237 | 0.047 |
| SERPING1   | chr11:57365026-57382326   | serpin family G member 1                                           | 0.853 | 0.417 |
| SERPINI1   | chr3:167453165-167543357  | serpin family I member 1                                           | 2.176 | 3.507 |
| SERTAD1    | chr19:40928408-40931932   | SERTA domain containing 1                                          | 2.262 | 3.505 |
| SESN2      | chr1:28585962-28609002    | sestrin 2                                                          | 5.359 | 10.89 |
| SETMAR     | chr3:4344891-4359268      | SET domain and mariner transposase fusion gene                     | 0.553 | 0.296 |
| SFI1       | chr22:31891964-32058351   | SFI1 centrin binding protein                                       | 1.604 | 2.063 |
| SFN        | chr1:27189632-27190947    | stratifin                                                          | 0.77  | 0.275 |
| SFTPD      | chr10:81697495-81708861   | surfactant protein D                                               | 0.448 | 0.417 |
| SFXN3      | chr10:102790955-102801232 | sideroflexin 3                                                     | 0.435 | 0.264 |
| SFXN4      | chr10:120900378-120925584 | sideroflexin 4                                                     | 0.532 | 0.386 |
| SGIP1      | chr1:66999824-67210768    | SH3-domain GRB2-like (endophilin) interacting protein 1            | 0.85  | 0.229 |
| SGK2       | chr20:42187634-42215583   | SGK2, serine/threonine kinase 2                                    | 0.216 | 0.053 |
| SGK223     | chr8:8175021-8243951      | homolog of rat pragra of Rnd2                                      | 2.061 | 3.46  |
| SGPL1      | chr10:72575681-72640932   | sphingosine-1-phosphate lyase 1                                    | 1.837 | 2.525 |
| SGTB       | chr5:64920557-65125230    | small glutamine rich tetratricopeptide repeat containing beta      | 2.561 | 3.824 |
| SH2B2      | chr7:101928404-101962178  | SH2B adaptor protein 2                                             | 2.967 | 6.826 |
| SH2B3      | chr12:111842666-111889427 | SH2B adaptor protein 3                                             | 2.495 | 4.052 |
| SH2D3A     | chr19:6752172-6767523     | SH2 domain containing 3A                                           | 0.693 | 0.373 |
| SH3BGR1    | chrX:80369199-80554046    | SH3 domain binding glutamate rich protein like                     | 0.492 | 0.337 |
| SH3BGR2    | chr6:80340986-80413374    | SH3 domain binding glutamate rich protein like 2                   | 0.761 | 0.295 |
| SH3BP2     | chr4:2794749-2842823      | SH3 domain binding protein 2                                       | 1.684 | 3.065 |
| SH3BP4     | chr2:235860627-235964358  | SH3 domain binding protein 4                                       | 1.973 | 2.518 |
| SH3BP5     | chr3:15247732-15382901    | SH3 domain binding protein 5                                       | 1.83  | 2.238 |
| SH3GL1     | chr19:4343523-4400565     | SH3 domain containing GRB2 like 1                                  | 1.684 | 2.823 |
| SH3GLB1    | chr1:87169081-87213867    | SH3 domain containing GRB2 like endophilin B1                      | 1.478 | 2.029 |
| SH3KBP1    | chrX:19552082-19905744    | SH3 domain containing kinase binding protein 1                     | 2.398 | 3.783 |
| SH3PXD2B   | chr5:171760502-171881527  | SH3 and PX domains 2B                                              | 2.654 | 4.955 |
| SH3RF1     | chr4:170015399-170192249  | SH3 domain containing ring finger 1                                | 1.56  | 2.607 |
| SH3RF2     | chr5:145316125-145461416  | SH3 domain containing ring finger 2                                | 0.286 | 0.195 |
| SH3RF3     | chr2:109743783-110262207  | SH3 domain containing ring finger 3                                | 2.393 | 3.633 |
| SHANK2     | chr11:70313960-70963724   | SH3 and multiple ankyrin repeat domains 2                          | 0.401 | 0.137 |
| SHB        | chr9:37910525-38069234    | SH2 domain containing adaptor protein B                            | 1.785 | 2.134 |
| SHC2       | chr19:416393-461840       | SHC (Src homology 2 domain containing) transforming protein 2      | 0.935 | 0.476 |
| SHH        | chr7:155593019-155604967  | sonic hedgehog                                                     | 0.531 | 0.133 |
| SHMT1      | chr17:18218593-18266856   | serine hydroxymethyltransferase 1                                  | 0.383 | 0.126 |
| SIGIRR     | chr1:405715-417397        | single immunoglobulin and toll-interleukin 1 receptor (TIR) domain | 0.533 | 0.342 |
| SIK1       | chr21:44834397-44847002   | salt inducible kinase 1                                            | 2.431 | 5.217 |
| SIPA1L2    | chr1:232533683-232766227  | signal induced proliferation associated 1 like 2                   | 2.927 | 5.482 |
| SIRT1      | chr10:69644420-69678147   | sirtuin 1                                                          | 1.546 | 2.152 |
| SKA3       | chr13:21727733-21753220   | spindle and kinetochore associated complex subunit 3               | 0.899 | 0.235 |
| SKI        | chr1:2160133-2241654      | SKI proto-oncogene                                                 | 2.221 | 4.531 |
| SKIDA1     | chr10:21776208-21814611   | SKI/DACH domain containing 1                                       | 0.546 | 0.239 |
| SKIL       | chr3:170075419-170114637  | SKI-like proto-oncogene                                            | 1.432 | 2.132 |
| SLC10A1    | chr14:70242551-70264793   | solute carrier family 10 member 1                                  | 0.181 | 0.026 |
| SLC10A3    | chrX:153715649-153719012  | solute carrier family 10 member 3                                  | 2.092 | 3.162 |
| SLC12A8    | chr3:124801479-124931609  | solute carrier family 12 member 8                                  | 0.851 | 0.452 |
| SLC13A4    | chr7:135347128-135412933  | solute carrier family 13 member 4                                  | 1.675 | 2.272 |
| SLC15A1    | chr13:99336054-99404929   | solute carrier family 15 member 1                                  | 0.14  | 0.013 |
| SLC15A3    | chr1:160691912-60719257   | solute carrier family 15 member 3                                  | 0.357 | 0.079 |
| SLC15A4    | chr12:129277738-129308541 | solute carrier family 15 member 4                                  | 1.638 | 2.017 |
| SLC16A1    | chr1:113454469-113498975  | solute carrier family 16 member 1                                  | 1.991 | 2.597 |
| SLC16A13   | chr17:6939393-6943440     | solute carrier family 16 member 13                                 | 0.801 | 0.432 |
| SLC16A3    | chr17:80175782-80197789   | solute carrier family 16 member 3                                  | 0.624 | 0.332 |
| SLC16A7    | chr12:59989820-60183635   | solute carrier family 16 member 7                                  | 0.465 | 0.247 |
| SLC17A4    | chr6:25754926-25781403    | solute carrier family 17 member 4                                  | 0.246 | 0.055 |
| SLC17A9    | chr20:61583998-61600265   | solute carrier family 17 member 9                                  | 0.363 | 0.217 |
| SLC18B1    | chr6:133090506-133119770  | solute carrier family 18 member B1                                 | 0.479 | 0.383 |
| SLC19A1    | chr21:46825096-46962385   | solute carrier family 19 member 1                                  | 0.784 | 0.438 |
| SLC19A3    | chr2:228549810-228582745  | solute carrier family 19 member 3                                  | 0.705 | 0.475 |
| SLC1A3     | chr5:36606456-36688436    | solute carrier family 1 member 3                                   | 0.348 | 0.312 |
| SLC1A4     | chr2:65215578-65251000    | solute carrier family 1 member 4                                   | 6.882 | 12.79 |
| SLC1A5     | chr19:47278136-47291842   | solute carrier family 1 member 5                                   | 4.224 | 6.902 |
| SLC22A1    | chr6:160542862-160579750  | solute carrier family 22 member 1                                  | 0.726 | 0.213 |
| SLC22A17   | chr14:23815522-23822116   | solute carrier family 22 member 17                                 | 0.669 | 0.474 |
| SLC22A18   | chr1:12909326-2946476     | solute carrier family 22 member 18                                 | 0.504 | 0.176 |
| SLC22A18AS | chr1:12909326-2946476     | solute carrier family 22 member 18 antisense                       | 0.311 | 0.066 |
| SLC22A4    | chr5:131630144-131731306  | solute carrier family 22 member 4                                  | 2.821 | 6.699 |
| SLC22A7    | chr6:43265713-43276530    | solute carrier family 22 member 7                                  | 0.085 | 0.03  |
| SLC23A1    | chr5:138669157-138719039  | solute carrier family 23 member 1                                  | 0.163 | 0.113 |
| SLC24A1    | chr15:65871095-66084735   | solute carrier family 24 member 1                                  | 0.709 | 0.333 |
| SLC25A18   | chr22:18043182-18074562   | solute carrier family 25 member 18                                 | 0.544 | 0.11  |
| SLC25A19   | chr17:73267344-73285530   | solute carrier family 25 member 19                                 | 1.493 | 2.265 |
| SLC25A20   | chr3:48894355-48936426    | solute carrier family 25 member 20                                 | 0.351 | 0.191 |
| SLC25A29   | chr14:100704493-100772860 | solute carrier family 25 member 29                                 | 2.255 | 3.355 |
| SLC25A30   | chr13:45967339-45992516   | solute carrier family 25 member 30                                 | 1.262 | 2.232 |
| SLC25A42   | chr19:19174802-19223841   | solute carrier family 25 member 42                                 | 0.461 | 0.317 |
| SLC26A1    | chr4:972862-1003433       | solute carrier family 26 member 1                                  | 0.591 | 0.356 |
| SLC26A2    | chr5:149340299-149366963  | solute carrier family 26 member 2                                  | 1.801 | 2.262 |
| SLC26A4    | chr7:107296960-107358252  | solute carrier family 26 member 4                                  | 3.113 | 6.422 |
| SLC27A2    | chr15:50474392-50528596   | solute carrier family 27 member 2                                  | 0.49  | 0.129 |
| SLC27A4    | chr9:131102838-131127870  | solute carrier family 27 member 4                                  | 1.554 | 2.2   |
| SLC27A5    | chr19:59009569-59023594   | solute carrier family 27 member 5                                  | 0.216 | 0.14  |
| SLC28A1    | chr15:85427784-85489200   | solute carrier family 28 member 1                                  | 0.244 | 0.047 |
| SLC28A2    | chr15:45543493-45571436   | solute carrier family 28 member 2                                  | 2.847 | 4.186 |
| SLC29A2    | chr11:66129449-66139291   | solute carrier family 29 member 2                                  | 0.618 | 0.287 |
| SLC2A12    | chr6:134308718-134373789  | solute carrier family 2 member 12                                  | 0.398 | 0.28  |
| SLC2A13    | chr12:40148822-40499881   | solute carrier family 2 member 13                                  | 1.613 | 2.135 |
| SLC2A14    | chr12:7965832-8130438     | solute carrier family 2 member 14                                  | 0.099 | 0.018 |
| SLC2A2     | chr3:170711973-170744768  | solute carrier family 2 member 2                                   | 0.068 | 0.003 |
| SLC30A10   | chr1:220046618-220321383  | solute carrier family 30 member 10                                 | 0.757 | 0.123 |
| SLC35D1    | chr1:67464886-67520345    | solute carrier family 35 member D1                                 | 0.5   | 0.283 |

|          |                           |                                                                                |       |       |
|----------|---------------------------|--------------------------------------------------------------------------------|-------|-------|
| SLC35E4  | chr22:31031680-31043862   | solute carrier family 35 member E4                                             | 2.334 | 5.035 |
| SLC35F6  | chr2:26987092-27004922    | solute carrier family 35 member F6                                             | 2.354 | 3.456 |
| SLC35G1  | chr10:95653727-95663523   | solute carrier family 35 member G1                                             | 0.635 | 0.25  |
| SLC36A1  | chr5:150827162-150875931  | solute carrier family 36 member 1                                              | 1.813 | 2.264 |
| SLC37A4  | chr1:118895023-118901616  | solute carrier family 37 member 4                                              | 0.356 | 0.113 |
| SLC38A1  | chr12:46576840-46663208   | solute carrier family 38 member 1                                              | 2.311 | 3.842 |
| SLC38A3  | chr3:50242691-50258494    | solute carrier family 38 member 3                                              | 0.162 | 0.078 |
| SLC38A4  | chr12:47158543-47219780   | solute carrier family 38 member 4                                              | 0.392 | 0.429 |
| SLC38A6  | chr14:61447831-61550451   | solute carrier family 38 member 6                                              | 0.71  | 0.463 |
| SLC39A10 | chr2:196521531-196602426  | solute carrier family 39 member 10                                             | 1.632 | 2.134 |
| SLC39A11 | chr17:70642084-71111934   | solute carrier family 39 member 11                                             | 0.743 | 0.442 |
| SLC39A5  | chr12:56623819-56654263   | solute carrier family 39 member 5                                              | 0.434 | 0.213 |
| SLC39A6  | chr18:33688493-33709357   | solute carrier family 39 member 6                                              | 1.709 | 2.422 |
| SLC3A2   | chr11:62623483-62656355   | solute carrier family 3 member 2                                               | 3.65  | 5.973 |
| SLC40A1  | chr2:190425315-190445537  | solute carrier family 40 member 1                                              | 0.813 | 0.317 |
| SLC43A2  | chr17:1473923-1532930     | solute carrier family 43 member 2                                              | 0.639 | 0.377 |
| SLC44A3  | chr1:95285897-95360878    | solute carrier family 44 member 3                                              | 0.503 | 0.16  |
| SLC44A5  | chr1:75667815-76076799    | solute carrier family 44 member 5                                              | 0.389 | 0.276 |
| SLC45A1  | chr1:8382458-8404227      | solute carrier family 45 member 1                                              | 0.634 | 0.214 |
| SLC46A3  | chr13:29274217-29293150   | solute carrier family 46 member 3                                              | 0.754 | 0.371 |
| SLC47A1  | chr17:19437166-19482628   | solute carrier family 47 member 1                                              | 0.546 | 0.229 |
| SLC47A2  | chr17:19581293-19620043   | solute carrier family 47 member 2                                              | 0.119 | 0.064 |
| SLC4A4   | chr4:72053002-72437804    | solute carrier family 4 member 4                                               | 0.569 | 0.4   |
| SLC4A7   | chr3:27414061-27525911    | solute carrier family 4 member 7                                               | 2.505 | 4.334 |
| SLC52A2  | chr8:145575912-145585217  | solute carrier family 52 member 2                                              | 1.78  | 3.293 |
| SLC5A6   | chr2:27422453-27440046    | solute carrier family 5 member 6                                               | 1.383 | 2.25  |
| SLC5A9   | chr1:48688331-48714511    | solute carrier family 5 member 9                                               | 0.14  | 0.027 |
| SLC6A17  | chr1:110693131-110744823  | solute carrier family 6 member 17                                              | 7.985 | 15.86 |
| SLC6A6   | chr3:14444088-14583588    | solute carrier family 6 member 6                                               | 1.6   | 2.638 |
| SLC6A8   | chrX:152953751-152962048  | solute carrier family 6 member 8                                               | 1.814 | 2.893 |
| SLC6A9   | chr1:44457279-44506190    | solute carrier family 6 member 9                                               | 5.109 | 9.985 |
| SLC7A11  | chr4:138948576-139163503  | solute carrier family 7 member 11                                              | 20.34 | 38.91 |
| SLC7A5   | chr16:87863628-87903100   | solute carrier family 7 member 5                                               | 14.15 | 22.59 |
| SLC7A7   | chr14:23242397-23289020   | solute carrier family 7 member 7                                               | 0.652 | 0.319 |
| SLC9A1   | chr1:27425298-27481869    | solute carrier family 9 member A1                                              | 5.382 | 13.79 |
| SLC9A7   | chrX:46458483-46618607    | solute carrier family 9 member A7                                              | 1.757 | 2.321 |
| SLC9A9   | chr3:142984063-143567373  | solute carrier family 9 member A9                                              | 0.653 | 0.46  |
| SLCO1B1  | chr12:21279103-21548371   | solute carrier organic anion transporter family member 1B1                     | 0.354 | 0.069 |
| SLCO2B1  | chr1:174862031-74917445   | solute carrier organic anion transporter family member 2B1                     | 0.107 | 0.03  |
| SLCO3A1  | chr15:92396937-92715665   | solute carrier organic anion transporter family member 3A1                     | 1.787 | 2.427 |
| SLCO5A1  | chr8:70581844-70747299    | solute carrier organic anion transporter family member 5A1                     | 9.167 | 19.65 |
| SLFN5    | chr17:33559381-33600676   | schlafen family member 5                                                       | 2.897 | 4.432 |
| SLIT2    | chr4:20253545-20622661    | slit guidance ligand 2                                                         | 2.005 | 3.556 |
| SLMO1    | chr18:12407894-12433004   | PRELI domain containing 3A                                                     | 2.466 | 4.827 |
| SMARCA1  | chrX:128313820-128657511  | SWI/SNF related, matrix associated, actin dependent regulator of chromatin, si | 0.449 | 0.244 |
| SMARCC2  | chr12:56555635-56583351   | SWI/SNF related, matrix associated, actin dependent regulator of chromatin su  | 0.625 | 0.461 |
| SMC2     | chr9:106854695-106903723  | structural maintenance of chromosomes 2                                        | 0.679 | 0.247 |
| SMCR8    | chr17:18218593-18266856   | Smith-Magenis syndrome chromosome region, candidate 8                          | 1.438 | 2.157 |
| SMG1     | chr16:18816096-18938045   | SMG1 phosphatidylinositol 3-kinase-related kinase                              | 1.428 | 2.075 |
| SMLR1    | chr6:131148439-131384462  | small leucine-rich protein 1                                                   | 0.151 | 0.018 |
| SMOC1    | chr14:70346113-70655787   | SPARC related modular calcium binding 1                                        | 0.476 | 0.14  |
| SPDLC3A  | chr6:123108220-123130864  | sphingomyelin phosphodiesterase acid like 3A                                   | 0.484 | 0.222 |
| SMPX     | chrX:21724089-21788953    | small muscle protein, X-linked                                                 | 0.244 | 0.055 |
| SMTNL1   | chr11:57295935-57318587   | smoothelin-like 1                                                              | 1.835 | 2.746 |
| SMURF1   | chr7:98476112-98741743    | SMAD specific E3 ubiquitin protein ligase 1                                    | 1.498 | 2.08  |
| SMURF2   | chr17:62538398-62658466   | SMAD specific E3 ubiquitin protein ligase 2                                    | 1.476 | 2.01  |
| SNAI2    | chr8:49830238-49834501    | snail family zinc finger 2                                                     | 1.993 | 2.863 |
| SNAPC2   | chr19:7985193-7988136     | small nuclear RNA activating complex polypeptide 2                             | 1.736 | 2.866 |
| SNHG15   | chr7:45022626-45026311    | small nucleolar RNA host gene 15                                               | 1.707 | 2.566 |
| SNHG5    | chr6:86386724-86388451    | small nucleolar RNA host gene 5                                                | 1.562 | 2.306 |
| SNPH     | chr20:1246959-1289971     | syntaphilin                                                                    | 1.774 | 2.441 |
| SNRNP35  | chr12:123942650-123950941 | small nuclear ribonucleoprotein U11/U12 subunit 35                             | 0.603 | 0.292 |
| SNUPN    | chr15:75890257-75918719   | snurportin 1                                                                   | 0.572 | 0.369 |
| SNX29    | chr16:12070600-12668146   | sorting nexin 29                                                               | 1.482 | 2.157 |
| SNX4     | chr3:125134053-125239058  | sorting nexin 4                                                                | 0.668 | 0.359 |
| SOCS1    | chr16:11343556-11350047   | suppressor of cytokine signaling 1                                             | 2.201 | 3.12  |
| SOCS7    | chr17:36507757-36561848   | suppressor of cytokine signaling 7                                             | 1.469 | 2.51  |
| SOD1     | chr21:33031934-33041243   | superoxide dismutase 1, soluble                                                | 0.676 | 0.455 |
| SOD2     | chr6:160100122-160177352  | superoxide dismutase 2, mitochondrial                                          | 0.527 | 0.311 |
| SOGA2    | chr18:8706002-8832775     | microtubule crosslinking factor 1                                              | 2.432 | 3.658 |
| SORBS2   | chr4:186506597-186877870  | sorbin and SH3 domain containing 2                                             | 0.221 | 0.051 |
| SORBS3   | chr8:22409250-22433010    | sorbin and SH3 domain containing 3                                             | 0.52  | 0.369 |
| SORD     | chr15:45315301-45367287   | sorbitol dehydrogenase                                                         | 0.246 | 0.122 |
| SORL1    | chr11:121322911-121504471 | soritin-related receptor, L(DLR class) A repeats containing                    | 0.406 | 0.318 |
| SOWAHA   | chr5:132149032-132152489  | sosondowah ankyrin repeat domain family member A                               | 0.771 | 0.11  |
| SOWAHC   | chr2:110371910-110376564  | sosondowah ankyrin repeat domain family member C                               | 2.25  | 3.874 |
| SOX4     | chr6:21593971-21598849    | SRY-box 4                                                                      | 3.342 | 2.362 |
| SOX6     | chr1:15987994-16629286    | SRY-box 6                                                                      | 0.436 | 0.25  |
| SP100    | chr2:231276514-231410317  | SP100 nuclear antigen                                                          | 0.594 | 0.416 |
| SPAG5    | chr17:26904582-26926102   | sperm associated antigen 5                                                     | 0.427 | 0.323 |
| SPARC    | chr5:151040656-151066809  | secreted protein acidic and cysteine rich                                      | 0.258 | 0.299 |
| SPATA2L  | chr16:89749863-89769135   | spermatogenesis associated 2 like                                              | 1.636 | 2.208 |
| SPC24    | chr19:11256178-11266639   | SPC24, NDC80 kinetochore complex component                                     | 0.582 | 0.064 |
| SPC25    | chr2:169727400-169747130  | SPC25, NDC80 kinetochore complex component                                     | 0.585 | 0.39  |
| SPECC1   | chr17:19912648-20220533   | sperm antigen with calponin homology and coiled-coil domains 1                 | 1.641 | 2.509 |
| SPHK1    | chr17:74305440-74383941   | sphingosine kinase 1                                                           | 4.21  | 11.48 |
| SPINK1   | chr5:147204142-147211260  | serine peptidase inhibitor, Kazal type 1                                       | 0.491 | 0.07  |
| SPINK5   | chr5:147443534-147516925  | serine peptidase inhibitor, Kazal type 5                                       | 0.337 | 0.194 |
| SPINT3   | chr20:44141100-44144264   | serine peptidase inhibitor, Kunitz type, 3                                     | 0.273 | 0.001 |
| SPIRE1   | chr18:124446503-12657912  | spire type actin nucleation factor 1                                           | 2.073 | 3.577 |
| SPIRE2   | chr16:89883245-89938205   | spire type actin nucleation factor 2                                           | 1.744 | 2.349 |
| SPOCK2   | chr10:730818791-73848790  | sparc/osteonectin, cwcv and kazal-like domains proteoglycan (testican) 2       | 2.452 | 5.136 |
| SPOON2   | chr4:1160720-1202750      | spondin 2                                                                      | 0.37  | 0.361 |
| SPP1     | chr4:88896455-88904563    | secreted phosphoprotein 1                                                      | 0.134 | 0.044 |
| SPRED1   | chr15:38544286-38649450   | sprouty related EVH1 domain containing 1                                       | 1.543 | 2.564 |
| SPRED2   | chr2:65537947-65662000    | sprouty related EVH1 domain containing 2                                       | 1.886 | 2.921 |
| SPRED3   | chr19:38880677-38891435   | sprouty related EVH1 domain containing 3                                       | 1.587 | 2.419 |
| SPRY2    | chr13:80910111-80915086   | sprouty RTK signaling antagonist 2                                             | 1.459 | 2.52  |
| SPRY4    | chr5:141689991-141704620  | sprouty RTK signaling antagonist 4                                             | 3.257 | 6.334 |
| SPRYD4   | chr12:56862300-56882181   | SPRY domain containing 4                                                       | 0.562 | 0.313 |
| SPRYD7   | chr13:50486841-50510625   | SPRY domain containing 7                                                       | 0.68  | 0.402 |
| SPTBN5   | chr15:42120282-42186275   | spectrin beta, non-erythrocytic 5                                              | 4.112 | 5.906 |
| SPTLC3   | chr20:12989620-13149751   | serine palmitoyltransferase long chain base subunit 3                          | 0.366 | 0.156 |

|          |                           |                                                                              |       |       |
|----------|---------------------------|------------------------------------------------------------------------------|-------|-------|
| SQLE     | chr8:126010719-126034525  | squalene epoxidase                                                           | 0.461 | 0.398 |
| SQSTM1   | chr5:179224597-179285840  | sequestosom 1                                                                | 1.921 | 2.138 |
| SRBD1    | chr2:45615818-45838433    | S1 RNA binding domain 1                                                      | 0.76  | 0.405 |
| SREBF1   | chr17:17584786-17740325   | sterol regulatory element binding transcription factor 1                     | 0.406 | 0.408 |
| SREBF2   | chr22:42229082-42303312   | sterol regulatory element binding transcription factor 2                     | 0.59  | 0.495 |
| SRGAP1   | chr12:64237839-64542203   | SLIT-ROBO Rho GTPase activating protein 1                                    | 1.876 | 2.361 |
| SRGAP2   | chr1:206511462-206637842  | SLIT-ROBO Rho GTPase activating protein 2                                    | 1.626 | 2.799 |
| SRGAP2D  | chr1:121107151-121204419  | SLIT-ROBO Rho GTPase activating protein 2D (pseudogene)                      | 1.667 | 2.897 |
| SRPX2    | chrX:98999162-99926424    | sushi repeat containing protein, X-linked 2                                  | 0.687 | 0.377 |
| SRXN1    | chr20:627256-634014       | sulfiredoxin 1                                                               | 3.557 | 5.057 |
| SSH1     | chr12:109176465-109251397 | slingshot protein phosphatase 1                                              | 2.024 | 2.649 |
| SSH3     | chr11:67070918-67080272   | slingshot protein phosphatase 3                                              | 0.534 | 0.362 |
| SSPO     | chr7:149461300-149531063  | SCO-spondin                                                                  | 0.317 | 0.182 |
| SSTR5    | chr16:1114081-1131454     | somatostatin receptor 5                                                      | 0.184 | 0.046 |
| ST3GAL5  | chr2:86066270-86116157    | ST3 beta-galactoside alpha-2,3-sialyltransferase 5                           | 0.781 | 0.475 |
| ST3GAL6  | chr3:98433176-98620543    | ST3 beta-galactoside alpha-2,3-sialyltransferase 6                           | 0.411 | 0.212 |
| ST6GAL1  | chr3:186648314-186796459  | ST6 beta-galactoside alpha-2,6-sialyltransferase 1                           | 0.363 | 0.038 |
| STAC     | chr3:36421968-36589496    | SH3 and cysteine rich domain                                                 | 3.592 | 5.593 |
| STAC2    | chr17:37366788-37382040   | SH3 and cysteine rich domain 2                                               | 0.116 | 0.061 |
| STAP2    | chr19:4324039-4338914     | signal transducing adaptor family member 2                                   | 0.394 | 0.178 |
| STARD10  | chr1:1:72465773-72504750  | StAR related lipid transfer domain containing 10                             | 0.402 | 0.123 |
| STARD9   | chr15:42867856-43029417   | StAR related lipid transfer domain containing 9                              | 1.493 | 2.569 |
| STAT6    | chr12:57482676-57505452   | signal transducer and activator of transcription 6                           | 0.312 | 0.192 |
| STC1     | chr8:23699433-23712320    | stanniocalcin 1                                                              | 2.776 | 5.174 |
| STEAP3   | chr2:119981383-120023227  | STEAP3 metalloredutase                                                       | 0.417 | 0.449 |
| STIM1    | chr1:1:3876862-4114440    | stromal interaction molecule 1                                               | 1.714 | 2.331 |
| STK10    | chr5:171469073-171615346  | serine/threonine kinase 10                                                   | 1.872 | 2.556 |
| STK24    | chr13:99102454-99229547   | serine/threonine kinase 24                                                   | 2.662 | 5.877 |
| STK32A   | chr5:146614570-146767607  | serine/threonine kinase 32A                                                  | 2.903 | 3.678 |
| STK35    | chr20:2082527-2129202     | serine/threonine kinase 35                                                   | 1.498 | 2.454 |
| STOM     | chr9:124101265-124132582  | stomatin                                                                     | 0.506 | 0.413 |
| STON2    | chr14:81726885-81902794   | stonin 2                                                                     | 2.58  | 4.732 |
| STPG1    | chr1:24645811-24800136    | sperm tail PG-rich repeat containing 1                                       | 1.849 | 2.633 |
| STX11    | chr6:144471653-144513076  | syntaxin 11                                                                  | 1.92  | 3.035 |
| STX1A    | chr7:73113515-73134039    | syntaxin 1A                                                                  | 1.816 | 2.817 |
| STX6     | chr1:180882312-180992172  | syntaxin 6                                                                   | 1.469 | 2.197 |
| STXBP1   | chr9:130374485-130455968  | syntaxin binding protein 1                                                   | 1.892 | 3.194 |
| SUCLG1   | chr2:84650646-85046713    | succinate-CoA ligase alpha subunit                                           | 0.543 | 0.375 |
| SUCLG2   | chr3:67410883-67705038    | succinate-CoA ligase GDP-forming beta subunit                                | 0.564 | 0.179 |
| SUCO     | chr1:172501856-172581077  | SUN domain containing ossification factor                                    | 1.602 | 2.141 |
| SULT1A1  | chr16:28616907-28634907   | sulfotransferase family 1A member 1                                          | 0.253 | 0.072 |
| SULT1A2  | chr16:28603263-28608391   | sulfotransferase family 1A member 2                                          | 0.354 | 0.094 |
| SULT1B1  | chr4:70591804-70626430    | sulfotransferase family 1B member 1                                          | 0.067 | 0.003 |
| SULT1C2  | chr2:108905094-108926371  | sulfotransferase family 1C member 2                                          | 0.238 | 0.059 |
| SULT2A1  | chr19:48373722-48389654   | sulfotransferase family 2A member 1                                          | 0.038 | 0.002 |
| SUOX     | chr12:56391042-56399340   | sulfite oxidase                                                              | 0.504 | 0.327 |
| SURF2    | chr9:136223420-136228213  | surfeit 2                                                                    | 1.753 | 2.728 |
| SUSD3    | chr9:95820985-95847555    | sushi domain containing 3                                                    | 0.207 | 0.058 |
| SUV39H1  | chrX:48555130-48567406    | suppressor of variegation 3-9 homolog 1                                      | 0.737 | 0.335 |
| SVIL     | chr10:29746111-30025908   | supervillin                                                                  | 1.689 | 2.448 |
| SYDE1    | chr19:15218213-15236584   | synapse defective Rho GTPase homolog 1                                       | 0.664 | 0.33  |
| SYNGR1   | chr22:39745953-39781593   | synaptogyrin 1                                                               | 0.698 | 0.407 |
| SYNJ2    | chr6:158402887-158520435  | synaptotagmin 2                                                              | 2.258 | 2.906 |
| SYT      | chrX:49044264-49056661    | synaptophysin                                                                | 6.129 | 12.57 |
| SYT1     | chr12:79257772-80084858   | synaptotagmin 1                                                              | 0.549 | 0.266 |
| SYT17    | chr16:19179637-19279605   | synaptotagmin 17                                                             | 0.24  | 0.103 |
| SYTL1    | chr1:27668482-27680423    | synaptotagmin like 1                                                         | 0.448 | 0.338 |
| SZRD1    | chr1:16693524-16724643    | SUZ RNA binding domain containing 1                                          | 1.899 | 3.144 |
| TACC1    | chr8:38585691-38710546    | transforming acidic coiled-coil containing protein 1                         | 0.39  | 0.267 |
| TACC2    | chr10:123748630-124014059 | transforming acidic coiled-coil containing protein 2                         | 1.435 | 2.279 |
| TANC2    | chr17:6778674-61505236    | tetratricopeptide repeat, ankyrin repeat and coiled-coil containing 2        | 1.929 | 2.698 |
| TANGO2   | chr22:20008601-20055454   | transport and golgi organization 2 homolog                                   | 2.053 | 3.436 |
| TANGO6   | chr16:68877461-69119202   | transport and golgi organization 6 homolog                                   | 0.716 | 0.427 |
| TAOK3    | chr12:118587605-118810750 | TAO kinase 3                                                                 | 1.464 | 2.127 |
| TAP2     | chr6:32789609-32806547    | transporter 2, ATP-binding cassette, sub-family B (MDR/TP)                   | 2.065 | 2.78  |
| TAPBPL   | chr12:6561176-6579843     | TAP binding protein like                                                     | 0.522 | 0.434 |
| TAPT1    | chr4:16162127-16228161    | transmembrane anterior posterior transformation 1                            | 0.67  | 0.433 |
| TAS2R5   | chr7:141487183-141494377  | taste 2 receptor member 5                                                    | 1.852 | 2.132 |
| TAT      | chr16:71481500-71645739   | tyrosine aminotransferase                                                    | 0.104 | 0.031 |
| TBC1D15  | chr12:72233486-72320629   | TBC1 domain family member 15                                                 | 1.64  | 2.132 |
| TBC1D20  | chr20:415994-443203       | TBC1 domain family member 20                                                 | 1.718 | 2.621 |
| TBC1D8   | chr2:101618690-101767909  | TBC1 domain family member 8                                                  | 1.38  | 2.132 |
| TBC1D8B  | chrX:106045918-106119377  | TBC1 domain family member 8B                                                 | 0.563 | 0.351 |
| TBL1X    | chrX:9431334-9687782      | transducin (beta)-like 1X-linked                                             | 3.34  | 5.334 |
| TBX20    | chr7:35237606-35293711    | T-box 20                                                                     | 1.532 | 2.268 |
| TBX3     | chr12:115108058-115122150 | T-box 3                                                                      | 1.604 | 2.105 |
| TCAIM    | chr3:44379462-44450944    | T-cell activation inhibitor, mitochondrial                                   | 0.647 | 0.478 |
| TCEAL1   | chrX:102883604-102885883  | transcription elongation factor A like 1                                     | 0.533 | 0.341 |
| TCEAL8   | chrX:102507919-102510121  | transcription elongation factor A like 8                                     | 0.572 | 0.3   |
| TCEANC2  | chr1:54519233-54576766    | transcription elongation factor A N-terminal and central domain containing 2 | 0.678 | 0.434 |
| TCTEX1D4 | chr1:45266035-45452394    | Tctex1 domain containing 4                                                   | 1.814 | 2.72  |
| TDRKH    | chr1:151732118-151763010  | tudor and KH domain containing                                               | 1.805 | 2.276 |
| TEC      | chr4:48065969-48271866    | tec protein tyrosine kinase                                                  | 1.486 | 2.449 |
| TENC1    | chr12:53436972-53473204   | tensin 2                                                                     | 0.217 | 0.083 |
| TENM1    | chrX:123509750-124319525  | teneurin transmembrane protein 1                                             | 0.672 | 0.335 |
| TENM3    | chr4:182128476-183724310  | teneurin transmembrane protein 3                                             | 1.613 | 2.334 |
| TES      | chr7:115850546-115898837  | testin LIM domain protein                                                    | 2.177 | 3.049 |
| TESK1    | chr9:35603231-35618424    | testis-specific kinase 1                                                     | 1.938 | 3.568 |
| TEX11    | chrX:69664704-70128567    | testis expressed 11                                                          | 0.36  | 0.148 |
| TF       | chr3:133464976-133497850  | transferrin                                                                  | 0.505 | 0.105 |
| TFAP2A   | chr6:10396915-10419797    | transcription factor AP-2 alpha                                              | 1.934 | 2.983 |
| TFAP2E   | chr1:36033239-36107451    | transcription factor AP-2 epsilon                                            | 2.076 | 4.225 |
| TFB2M    | chr1:246703862-246831884  | transcription factor B2, mitochondrial                                       | 0.525 | 0.343 |
| TFPI     | chr2:188328957-188419406  | tissue factor pathway inhibitor                                              | 0.398 | 0.283 |
| TFPI2    | chr7:93486139-93520303    | tissue factor pathway inhibitor 2                                            | 5.252 | 7.415 |
| TGFA     | chr2:70674411-70781278    | transforming growth factor alpha                                             | 1.817 | 2.359 |
| TGFB1    | chr19:41768390-41859860   | transforming growth factor beta 1                                            | 2.537 | 3.851 |
| TGFB2    | chr1:218517537-218617961  | transforming growth factor beta 2                                            | 3.355 | 3.858 |
| TGIF1    | chr18:3412071-3458406     | TGFB induced factor homeobox 1                                               | 2.204 | 3.858 |
| TGM2     | chr20:36756859-36793700   | transglutaminase 2                                                           | 2.658 | 5.549 |
| THBS1    | chr15:39873169-39889668   | thrombospondin 1                                                             | 3.371 | 2.261 |
| THOC3    | chr5:175386533-175395545  | THO complex 3                                                                | 0.83  | 0.322 |
| THOC6    | chr16:3072625-3077756     | THO complex 6                                                                | 2.285 | 3.076 |

|           |                           |                                                         |       |       |
|-----------|---------------------------|---------------------------------------------------------|-------|-------|
| THPO      | chr3:184089772-184097640  | thrombopoietin                                          | 0.254 | 0.036 |
| THRSP     | chr11:77726760-77850699   | thyroid hormone responsive                              | 0.422 | 0.152 |
| THSD1     | chr13:52951302-52980629   | thrombospondin type 1 domain containing 1               | 1.91  | 2.416 |
| THYN1     | chr11:134118172-134123260 | thymocyte nuclear protein 1                             | 0.598 | 0.391 |
| TJP3      | chr19:3708334-3761673     | tight junction protein 3                                | 0.346 | 0.071 |
| TLE4      | chr9:82186866-82341893    | transducin like enhancer of split 4                     | 1.65  | 2.738 |
| TLN2      | chr15:62682531-63136830   | talin 2                                                 | 1.942 | 3.422 |
| TLR2      | chr4:154605147-154681387  | toll like receptor 2                                    | 1.757 | 2.437 |
| TLR3      | chr4:186989940-187007794  | toll like receptor 3                                    | 0.345 | 0.177 |
| TM4SF1    | chr3:149086804-149096876  | transmembrane 4 L six family member 1                   | 0.529 | 0.205 |
| TM4SF4    | chr3:149192361-149221181  | transmembrane 4 L six family member 4                   | 0.139 | 0.012 |
| TM7SF2    | chr11:64863464-64887176   | transmembrane 7 superfamily member 2                    | 0.828 | 0.452 |
| TM7SF3    | chr12:27091304-27167339   | transmembrane 7 superfamily member 3                    | 0.584 | 0.458 |
| TM9SF2    | chr13:100153518-100216302 | transmembrane 9 superfamily member 2                    | 0.714 | 0.467 |
| TMBIM4    | chr12:66524586-66563821   | transmembrane BAX inhibitor motif containing 4          | 0.631 | 0.41  |
| TMED5     | chr1:93615298-93811378    | transmembrane p24 trafficking protein 5                 | 1.362 | 2.082 |
| TMEM102   | chr17:7338623-7341751     | transmembrane protein 102                               | 0.683 | 0.326 |
| TMEM132A  | chr1:1.60691912-60719257  | transmembrane protein 132A                              | 1.612 | 2.579 |
| TMEM144   | chr4:159131400-159176439  | transmembrane protein 144                               | 0.446 | 0.191 |
| TMEM144A  | chr6:52535883-52551385    | transmembrane protein 144A                              | 0.511 | 0.265 |
| TMEM158   | chr3:45265955-45267814    | transmembrane protein 158 (gene/pseudogene)             | 2.058 | 3.027 |
| TMEM160   | chr19:47549166-47551882   | transmembrane protein 160                               | 0.758 | 0.318 |
| TMEM173   | chr5:138855112-138862353  | transmembrane protein 173                               | 0.432 | 0.36  |
| TMEM176A  | chr7:150488375-150502208  | transmembrane protein 176A                              | 0.374 | 0.099 |
| TMEM176B  | chr7:150488375-150502208  | transmembrane protein 176B                              | 0.477 | 0.109 |
| TMEM178B  | chr7:140704723-141180179  | transmembrane protein 178B                              | 2.223 | 3.511 |
| TMEM180   | chr10:104220584-104236992 | major facilitator superfamily domain containing 13A     | 2.39  | 3.642 |
| TMEM184B  | chr22:38615297-38669040   | transmembrane protein 184B                              | 2.633 | 4.346 |
| TMEM191A  | chr22:21055401-21059292   | transmembrane protein 191A (pseudogene)                 | 1.621 | 2.604 |
| TMEM192   | chr4:16599657-166034024   | transmembrane protein 192                               | 0.668 | 0.441 |
| TMEM198B  | chr12:56211805-56236767   | transmembrane protein 198B (pseudogene)                 | 0.636 | 0.456 |
| TMEM201   | chr1:9648824-9674960      | transmembrane protein 201                               | 1.618 | 2.679 |
| TMEM217   | chr6:37179953-37300746    | transmembrane protein 217                               | 4.01  | 2.831 |
| TMEM229B  | chr14:67936982-67982021   | transmembrane protein 229B                              | 0.297 | 0.158 |
| TMEM231   | chr16:75572014-75590184   | transmembrane protein 231                               | 2.089 | 3.292 |
| TMEM238   | chr19:55890611-55895627   | transmembrane protein 238                               | 0.698 | 0.225 |
| TMEM26    | chr10:63166400-63213356   | transmembrane protein 26                                | 0.399 | 0.295 |
| TMEM30B   | chr14:61744088-62017698   | transmembrane protein 30B                               | 0.397 | 0.175 |
| TMEM37    | chr2:120189407-120282028  | transmembrane protein 37                                | 0.469 | 0.106 |
| TMEM47    | chrX:34645180-34675458    | transmembrane protein 47                                | 2.062 | 3.696 |
| TMEM48    | chr1:54224043-54304225    | NDC1 transmembrane nucleoporin                          | 0.753 | 0.322 |
| TMEM74B   | chr20:1160968-1166087     | transmembrane protein 74B                               | 0.555 | 0.409 |
| TMEM79    | chr1:156182778-156262234  | transmembrane protein 79                                | 1.593 | 2.345 |
| TMEM87A   | chr15:42502725-42704515   | transmembrane protein 87A                               | 1.24  | 2.035 |
| TMEM97    | chr17:26646120-26662515   | transmembrane protein 97                                | 0.308 | 0.113 |
| TMPO      | chr12:98906750-98944157   | thymopoietin                                            | 0.794 | 0.449 |
| TMPRSS2   | chr21:42836477-42880085   | transmembrane protease, serine 2                        | 0.807 | 0.193 |
| TMPRSS6   | chr22:37444778-37505731   | transmembrane protease, serine 6                        | 0.73  | 0.249 |
| TMSB10    | chr2:85116659-85133799    | thymosin beta 10                                        | 2.072 | 2.434 |
| TMTC2     | chr12:83080793-83528600   | transmembrane and tetratricopeptide repeat containing 2 | 2.068 | 3.048 |
| TMTC4     | chr13:101255977-101327103 | transmembrane and tetratricopeptide repeat containing 4 | 0.658 | 0.372 |
| TMUB1     | chr7:150778169-150780620  | transmembrane and ubiquitin like domain containing 1    | 0.609 | 0.364 |
| TNC       | chr9:117781853-117888638  | tenascin C                                              | 2.805 | 6.508 |
| TNFAIP8L1 | chr19:4639526-4655580     | TNF alpha induced protein 8 like 1                      | 0.372 | 0.261 |
| TNFRSF10B | chr8:22844929-22941132    | tumor necrosis factor receptor superfamily member 10b   | 1.486 | 2.359 |
| TNFRSF10C | chr8:22941867-22979485    | tumor necrosis factor receptor superfamily member 10c   | 0.366 | 0.235 |
| TNFRSF11A | chr18:59992519-60058405   | tumor necrosis factor receptor superfamily member 11a   | 2.87  | 4.704 |
| TNFRSF11B | chr8:119935795-119964410  | tumor necrosis factor receptor superfamily member 11b   | 0.304 | 0.169 |
| TNFRSF12A | chr6:3070312-3072383      | tumor necrosis factor receptor superfamily member 12A   | 4.105 | 6.524 |
| TNFRSF14  | chr1:2487207-2495346      | tumor necrosis factor receptor superfamily member 14    | 0.311 | 0.175 |
| TNFRSF1A  | chr12:6437922-6451283     | tumor necrosis factor receptor superfamily member 1A    | 0.699 | 0.479 |
| TNFRSF21  | chr6:47199267-47277680    | tumor necrosis factor receptor superfamily member 21    | 2.614 | 2.792 |
| TNFRSF9   | chr1:7975930-8003225      | tumor necrosis factor receptor superfamily member 9     | 20.11 | 27.5  |
| TNFSF10   | chr3:17223297-172241306   | tumor necrosis factor superfamily member 10             | 0.239 | 0.082 |
| TNFSF14   | chr19:6663147-6670599     | tumor necrosis factor superfamily member 14             | 0.458 | 0.35  |
| TNFSF9    | chr19:6531009-6535939     | tumor necrosis factor superfamily member 9              | 2.476 | 3.42  |
| TNIP3     | chr4:122050891-122226112  | TNFAIP3 interacting protein 3                           | 0.257 | 0.193 |
| TNNI2     | chr1:1860232-1862910      | troponin I2, fast skeletal type                         | 0.111 | 0.307 |
| TNNI3     | chr19:55663132-55669276   | troponin I3, cardiac type                               | 3.06  | 7.209 |
| TNPO1     | chr5:72112417-72210215    | transportin 1                                           | 1.4   | 2.018 |
| TNRC18    | chr7:5346092-5463210      | trinucleotide repeat containing 18                      | 1.46  | 1.265 |
| TNRC6C    | chr17:75955237-76107880   | trinucleotide repeat containing 6C                      | 1.546 | 2.125 |
| TNS1      | chr2:218664298-218808827  | tensin 1                                                | 0.363 | 0.288 |
| TNXA      | chr6:31971726-31981050    | tenascin XA (pseudogene)                                | 0.122 | 0.056 |
| TNXB      | chr6:32006092-32077151    | tenascin XB                                             | 0.302 | 0.393 |
| TOMM34    | chr20:43570770-43589114   | translocase of outer mitochondrial membrane 34          | 2.353 | 3.637 |
| TOMM40L   | chr1:161195562-161208000  | translocase of outer mitochondrial membrane 40 like     | 0.495 | 0.167 |
| TOP2A     | chr17:38544772-38574202   | topoisomerase (DNA) II alpha                            | 0.329 | 0.205 |
| TOPBP1    | chr3:133319413-133380813  | topoisomerase (DNA) II binding protein 1                | 0.94  | 0.461 |
| TP53I11   | chr1:144785975-44972857   | tumor protein p53 inducible protein 11                  | 1.689 | 2.269 |
| TPBG      | chr6:83072922-83080390    | trophoblast glycoprotein                                | 1.655 | 2.899 |
| TPM4      | chr19:16178316-16213813   | tropomyosin 4                                           | 2.612 | 2.644 |
| TPPP      | chr5:659976-693510        | tubulin polymerization promoting protein                | 2.772 | 4.58  |
| TPRXL     | chr3:13978906-14107481    | tetra-peptide repeat homeobox-like                      | 1.995 | 24.81 |
| TPST2     | chr22:26917876-26986114   | tyrosylprotein sulfotransferase 2                       | 1.246 | 2.188 |
| TPX2      | chr20:30326776-30389603   | TPX2, microtubule nucleation factor                     | 0.475 | 0.365 |
| TRAF3     | chr14:103243815-103377837 | TNF receptor associated factor 3                        | 1.798 | 2.63  |
| TRIB1     | chr8:126442562-126450644  | tribbles pseudokinase 1                                 | 2.3   | 2.82  |
| TRIB3     | chr20:361307-378203       | tribbles pseudokinase 3                                 | 12.08 | 20.94 |
| TRIM10    | chr6:30119718-30140473    | tripartite motif containing 10                          | 0.569 | 0.193 |
| TRIM14    | chr9:100818958-100881488  | tripartite motif containing 14                          | 0.455 | 0.271 |
| TRIM15    | chr6:30119718-30140473    | tripartite motif containing 15                          | 0.641 | 0.218 |
| TRIM22    | chr11:5710816-5732093     | tripartite motif containing 22                          | 0.43  | 0.325 |
| TRIM25    | chr17:54965269-54991409   | tripartite motif containing 25                          | 1.473 | 2.401 |
| TRIM31    | chr6:30070573-30080867    | tripartite motif containing 31                          | 0.345 | 0.133 |
| TRIM34    | chr1:15617330-5665633     | tripartite motif containing 34                          | 0.489 | 0.145 |
| TRIM47    | chr17:73870244-73874656   | tripartite motif containing 47                          | 1.636 | 2.176 |
| TRIM56    | chr7:100728578-100741267  | tripartite motif containing 56                          | 1.388 | 2.286 |
| TRIM62    | chr1:33593830-33766320    | tripartite motif containing 62                          | 1.483 | 2.08  |
| TRIM9     | chr14:51441980-51562627   | tripartite motif containing 9                           | 2.801 | 3.052 |
| TRIML1    | chr4:189054658-189098156  | tripartite motif family like 1                          | 1.912 | 2.483 |
| TRIO      | chr5:14143828-14510279    | trio Rho guanine nucleotide exchange factor             | 1.937 | 2.539 |
| TRNP1     | chr17:27320191-27327377   | TMF1-regulated nuclear protein 1                        | 2.448 | 2.945 |

|          |                           |                                                                  |       |       |
|----------|---------------------------|------------------------------------------------------------------|-------|-------|
| TRPM3    | chr9:73149965-73736514    | transient receptor potential cation channel subfamily M member 3 | 0.544 | 0.4   |
| TSC22D2  | chr3:150125875-150184207  | TSC22 domain family member 2                                     | 2.047 | 3.628 |
| TSEN2    | chr3:12525868-12575010    | tRNA splicing endonuclease subunit 2                             | 0.852 | 0.449 |
| TSFM     | chr12:58176527-58213433   | Ts translation elongation factor, mitochondrial                  | 0.697 | 0.499 |
| TSGA10   | chr2:99613723-99779752    | testis specific 10                                               | 2.645 | 4.589 |
| TSKU     | chr1:176493356-76509198   | tsukushi, small leucine rich proteoglycan                        | 0.389 | 0.136 |
| TSLP     | chr5:110405777-110413722  | thymic stromal lymphopoietin                                     | 2.543 | 3.486 |
| TSNAXIP1 | chr16:67841009-67861971   | translin associated factor X interacting protein 1               | 0.647 | 0.314 |
| TSPAN5   | chr4:99391517-99579812    | tetraspanin 5                                                    | 1.884 | 2.619 |
| TSPAN6   | chrX:99883695-99891857    | tetraspanin 6                                                    | 0.783 | 0.396 |
| TSPEAR   | chr2:145905219-46131495   | thrombospondin-type laminin G domain and EAR repeats             | 3.302 | 4.719 |
| TST      | chr22:37406899-37425863   | thiosulfate sulfurtransferase                                    | 0.482 | 0.284 |
| TTC22    | chr1:55245382-55267221    | tetratricopeptide repeat domain 22                               | 0.41  | 0.243 |
| TTC23L   | chr5:34837830-34899564    | tetratricopeptide repeat domain 23 like                          | 0.687 | 3.656 |
| TTC27    | chr2:32847067-33046118    | tetratricopeptide repeat domain 27                               | 0.619 | 0.323 |
| TTC30A   | chr2:178477798-178483706  | tetratricopeptide repeat domain 30A                              | 0.63  | 0.275 |
| TTC30B   | chr2:178413632-178418029  | tetratricopeptide repeat domain 30B                              | 0.488 | 0.203 |
| TTC38    | chr22:46663860-46690451   | tetratricopeptide repeat domain 38                               | 0.503 | 0.24  |
| TTC39B   | chr9:15163638-15307358    | tetratricopeptide repeat domain 39B                              | 1.723 | 2.584 |
| TTC39C   | chr18:21572736-21715977   | tetratricopeptide repeat domain 39C                              | 0.511 | 0.271 |
| TTC7B    | chr14:91006931-91282761   | tetratricopeptide repeat domain 7B                               | 1.76  | 2.098 |
| TTK      | chr6:80714321-80752244    | TTK protein kinase                                               | 0.476 | 0.248 |
| TTL      | chr2:113239717-113290236  | tubulin tyrosine ligase                                          | 1.993 | 2.754 |
| TTL11    | chr9:124577984-124855885  | tubulin tyrosine ligase like 11                                  | 1.527 | 2.052 |
| TTPA     | chr6:63971799-63998645    | tocopherol (alpha) transfer protein                              | 0.194 | 0.036 |
| TTR      | chr18:29171729-29178986   | transthyretin                                                    | 0.098 | 0.016 |
| TUBA3D   | chr2:132202795-132360468  | tubulin alpha 3c                                                 | 0.48  | 0.373 |
| TUBB     | chr6:30688156-30693195    | tubulin beta class I                                             | 1.828 | 2.019 |
| TUBB4B   | chr9:140135710-140177093  | tubulin beta 4B class IVb                                        | 3.109 | 3.924 |
| TUBE1    | chr6:112391859-112575917  | tubulin epsilon 1                                                | 1.663 | 2.216 |
| TUFT1    | chr1:151512780-151556059  | tuftelin 1                                                       | 5.384 | 8.115 |
| TULP4    | chr6:158653226-158932984  | tubby like protein 4                                             | 1.524 | 2.369 |
| TUSC3    | chr8:15274713-15744806    | tumor suppressor candidate 3                                     | 1.689 | 2.821 |
| TWF2     | chr3:52262625-52273194    | twinfilin actin binding protein 2                                | 0.624 | 0.469 |
| TXNDC15  | chr5:134209459-134240226  | thioredoxin domain containing 15                                 | 0.468 | 0.264 |
| TXNIP    | chr1:145438461-145442628  | thioredoxin interacting protein                                  | 0.655 | 0.36  |
| TXNRD2   | chr22:19863039-20004309   | thioredoxin reductase 2                                          | 0.558 | 0.362 |
| TYRO3    | chr15:41850419-41876259   | TYRO3 protein tyrosine kinase                                    | 1.94  | 3.104 |
| TYW3     | chr1:75171073-75232360    | tRNA-yW synthesizing protein 3 homolog                           | 0.686 | 0.461 |
| U2AF1    | chr21:44513065-44527697   | U2 small nuclear RNA auxiliary factor 1                          | 0.692 | 0.491 |
| UAP1     | chr1:162531267-162569633  | UDP-N-acetylglucosamine pyrophosphorylase 1                      | 1.466 | 2.115 |
| UBASH3B  | chr11:122526397-122685187 | ubiquitin associated and SH3 domain containing B                 | 6.496 | 11.52 |
| UBD      | chr6:29520359-29527702    | ubiquitin D                                                      | 0.639 | 0.088 |
| UBE2A    | chrX:118708498-118718379  | ubiquitin conjugating enzyme E2 A                                | 1.507 | 2.05  |
| UBE2L6   | chr1:157319127-57335803   | ubiquitin conjugating enzyme E2 L6                               | 0.678 | 0.423 |
| UBE2S    | chr9:55895922-55919325    | ubiquitin conjugating enzyme E2 S                                | 1.982 | 3.037 |
| UBE3D    | chr6:83602185-83775545    | ubiquitin protein ligase E3D                                     | 0.843 | 0.433 |
| UBN1     | chr16:4897911-4932363     | ubiquitin 1                                                      | 1.541 | 2.419 |
| UBXN11   | chr1:26608278-26647014    | UBX domain protein 11                                            | 0.547 | 0.314 |
| UBXN8    | chr8:30601533-30624520    | UBX domain protein 8                                             | 0.502 | 0.241 |
| UFC1     | chr1:161070345-161128646  | ubiquitin-fold modifier conjugating enzyme 1                     | 0.587 | 0.404 |
| UFSF2    | chr4:186317069-186347264  | UFM1-specific peptidase 2                                        | 0.62  | 0.363 |
| UGDH     | chr4:39500374-39529218    | UDP-glucose 6-dehydrogenase                                      | 0.532 | 0.197 |
| UGP2     | chr2:64068097-64246490    | UDP-glucose pyrophosphorylase 2                                  | 0.571 | 0.405 |
| UGT1A1   | chr2:234526290-234681951  | UDP glucuronosyltransferase family 1 member A1                   | 0.452 | 0.08  |
| UGT2A3   | chr4:69794176-69817509    | UDP glucuronosyltransferase family 2 member A3                   | 0.247 | 0.035 |
| UGT2B15  | chr4:69382873-69536494    | UDP glucuronosyltransferase family 2 member B15                  | 0.23  | 0.033 |
| UGT2B4   | chr4:70345882-70361626    | UDP glucuronosyltransferase family 2 member B4                   | 0.183 | 0.044 |
| UGT2B7   | chr4:69962192-70267587    | UDP glucuronosyltransferase family 2 member B7                   | 0.351 | 0.069 |
| UGT3A1   | chr5:35953190-36001130    | UDP glycosyltransferase family 3 member A1                       | 0.452 | 0.185 |
| UHRF1BP1 | chr6:34759793-34845308    | UHRF1 binding protein 1                                          | 1.741 | 2.37  |
| ULK1     | chr12:132379160-132407819 | unc-51 like autophagy activating kinase 1                        | 1.736 | 2.602 |
| UNC5A    | chr5:176237559-176326333  | unc-5 netrin receptor A                                          | 0.837 | 0.304 |
| UNC5B    | chr10:72972291-73062635   | unc-5 netrin receptor B                                          | 25.96 | 72.69 |
| UPB1     | chr22:24891250-24922582   | ureidopropionase, beta                                           | 0.234 | 0.12  |
| UPP1     | chr7:48128007-48148330    | uridine phosphorylase 1                                          | 5.027 | 16.78 |
| UPP2     | chr2:158733116-158992666  | uridine phosphorylase 2                                          | 1.437 | 10.27 |
| UQCRC2   | chr16:21964608-21994668   | ubiquinol-cytochrome c reductase core protein II                 | 0.586 | 0.412 |
| UQCRLH   | chr1:16133656-16134194    | ubiquinol-cytochrome c reductase hinge protein like              | 2.429 | 4.618 |
| UROD     | chr1:45477614-45481341    | uroporphyrinogen decarboxylase                                   | 0.486 | 0.337 |
| USF1     | chr1:161009040-161015769  | upstream transcription factor 1                                  | 0.732 | 0.462 |
| USP18    | chr22:18632717-18660162   | ubiquitin specific peptidase 18                                  | 0.412 | 0.247 |
| USP25    | chr21:17102269-17252377   | ubiquitin specific peptidase 25                                  | 1.669 | 2.086 |
| USP30    | chr12:10949845-109525831  | ubiquitin specific peptidase 30                                  | 0.551 | 0.371 |
| USP31    | chr16:23072674-23160643   | ubiquitin specific peptidase 31                                  | 1.687 | 2.116 |
| USP32P2  | chr17:18414386-18430935   | ubiquitin specific peptidase 32 pseudogene 2                     | 1.688 | 3.632 |
| USP35    | chr1:177899857-78128868   | ubiquitin specific peptidase 35                                  | 0.711 | 0.387 |
| USP43    | chr17:9547665-9633138     | ubiquitin specific peptidase 43                                  | 0.36  | 0.164 |
| UST      | chr6:149068093-149398148  | uronyl 2-sulfotransferase                                        | 1.582 | 2.719 |
| UTP20    | chr12:101673904-101801653 | UTP20, small subunit processome component                        | 0.789 | 0.415 |
| UXS1     | chr2:106709758-106810795  | UDP-glucuronate decarboxylase 1                                  | 2.518 | 3.96  |
| VAMP5    | chr2:85811530-85820519    | vesicle associated membrane protein 5                            | 0.797 | 0.485 |
| VAMP8    | chr2:85804613-85809156    | vesicle associated membrane protein 8                            | 0.381 | 0.147 |
| VARS     | chr6:31745296-31763742    | valyl-tRNA synthetase                                            | 0.778 | 0.485 |
| VASN     | chr16:4390251-4470502     | vasonin                                                          | 1.611 | 2.842 |
| VAT1     | chr17:41166621-41174459   | vesicle amine transport 1                                        | 2.156 | 2.731 |
| VCAN     | chr5:82767403-82878122    | versican                                                         | 2.512 | 4.187 |
| VDR      | chr12:48235026-48298814   | vitamin D (1,25-dihydroxyvitamin D3) receptor                    | 2.2   | 3.408 |
| VEGFA    | chr6:43737945-43754223    | vascular endothelial growth factor A                             | 1.379 | 2.082 |
| VEPH1    | chr3:156977531-157221415  | ventricular zone expressed PH domain containing 1                | 0.344 | 0.148 |
| VGFB     | chr7:100805789-100810472  | VEGF nerve growth factor inducible                               | 3.288 | 5.534 |
| VGLL4    | chr3:11314009-11762220    | vestigial like family member 4                                   | 1.546 | 2.563 |
| VIL1     | chr2:219283837-219461158  | villin 1                                                         | 0.427 | 0.057 |
| VIMP     | chr15:101811213-101817700 | VCP interacting membrane selenoprotein                           | 1.692 | 2.684 |
| VNN1     | chr6:133001996-133041070  | vanin 1                                                          | 0.238 | 0.052 |
| VNN2     | chr6:133065008-133084651  | vanin 2                                                          | 0.462 | 0.163 |
| VNN3     | chr6:133043925-133055904  | vanin 3                                                          | 0.091 | 0.007 |
| VPS52    | chr6:33217312-33239662    | VPS52, GARP complex subunit                                      | 0.566 | 0.331 |
| VSNL1    | chr2:17721806-17837706    | visinin like 1                                                   | 0.482 | 0.145 |
| VTN      | chr17:26694298-26697373   | vitronectin                                                      | 0.701 | 0.163 |
| VWA1     | chr1:1370638-1432486      | von Willebrand factor A domain containing 1                      | 0.635 | 0.322 |
| VWA5A    | chr11:123986110-124017618 | von Willebrand factor A domain containing 5A                     | 0.68  | 0.399 |
| VWA5B2   | chr3:183948316-183967313  | von Willebrand factor A domain containing 5B2                    | 5.062 | 4.237 |

|         |                           |                                                                        |       |       |
|---------|---------------------------|------------------------------------------------------------------------|-------|-------|
| WARS    | chr14:100800124-100842680 | tryptophanyl-tRNA synthetase                                           | 3.235 | 3.687 |
| WARS2   | chr1:119573838-119727028  | tryptophanyl tRNA synthetase 2, mitochondrial                          | 1.694 | 2.136 |
| WAS     | chrX:48535015-48549817    | Wiskott-Aldrich syndrome                                               | 0.642 | 0.906 |
| WASL    | chr7:123321996-123389116  | Wiskott-Aldrich syndrome like                                          | 1.718 | 3.376 |
| WBSCR22 | chr7:73097894-73112551    | Williams-Beuren syndrome chromosome region 22                          | 1.718 | 3.371 |
| WDR18   | chr9:984112-994741        | WD repeat domain 18                                                    | 0.638 | 0.425 |
| WDR25   | chr14:100842754-100996640 | WD repeat domain 25                                                    | 1.635 | 2.394 |
| WDR92   | chr2:68356961-68384692    | WD repeat domain 92                                                    | 0.722 | 0.464 |
| WFS1    | chr4:6271576-6304992      | wolframin ER transmembrane glycoprotein                                | 1.696 | 2.75  |
| WISP2   | chr20:43342918-43356656   | WNT1 inducible signaling pathway protein 2                             | 0.266 | 0.343 |
| WNK1    | chr12:861713-1605099      | WNK lysine deficient protein kinase 1                                  | 1.422 | 2.089 |
| WNK4    | chr17:40932626-40949130   | WNK lysine deficient protein kinase 4                                  | 1.724 | 3.123 |
| WNT4    | chr1:22443797-22469564    | Wnt family member 4                                                    | 3.163 | 6.763 |
| WNT6    | chr2:219724545-219738954  | Wnt family member 6                                                    | 0.33  | 0.37  |
| WNT7B   | chr22:46316247-46373008   | Wnt family member 7B                                                   | 3.557 | 2.971 |
| WSB1    | chr17:25621102-25643328   | WD repeat and SOCS box containing 1                                    | 1.792 | 2.589 |
| WWC3    | chrX:9982749-10112518     | WWC family member 3                                                    | 2.425 | 4.335 |
| XDH     | chr2:31557187-31637611    | xanthine dehydrogenase                                                 | 0.441 | 0.188 |
| XKRX    | chrX:100143678-100184344  | XK related, X-linked                                                   | 0.66  | 0.452 |
| XPOT    | chr12:64797937-64845063   | exportin for tRNA                                                      | 2.653 | 3.812 |
| XRCC4   | chr5:82373316-82649579    | X-ray repair complementing defective repair in Chinese hamster cells 4 | 0.524 | 0.295 |
| XYLB    | chr3:38388250-38469000    | xylokine homolog (H. influenzae)                                       | 0.558 | 0.317 |
| YARS    | chr1:33240839-3324480     | tyrosyl-tRNA synthetase                                                | 2.98  | 4.543 |
| YKT6    | chr7:44240577-44253893    | YKT6 v-SNARE homolog (S. cerevisiae)                                   | 1.913 | 2.807 |
| YPEL1   | chr22:22020272-22090071   | yippee like 1                                                          | 1.566 | 2.564 |
| YPEL3   | chr16:30103634-30107584   | yippee like 3                                                          | 0.531 | 0.314 |
| ZBTB7B  | chr1:154974646-154991001  | zinc finger and BTB domain containing 7B                               | 0.419 | 0.137 |
| ZC2HC1A | chr8:79578281-79631997    | zinc finger C2HC-type containing 1A                                    | 2.143 | 2.995 |
| ZC3H12C | chr11:109963707-110042566 | zinc finger CCCH-type containing 12C                                   | 1.428 | 2.219 |
| ZC3H13  | chr13:46528610-46626896   | zinc finger CCCH-type containing 13                                    | 0.573 | 0.485 |
| ZCCHC14 | chr16:87439851-87525869   | zinc finger CCHC-type containing 14                                    | 1.381 | 2.543 |
| ZEB2    | chr2:145141941-145278465  | zinc finger E-box binding homeobox 2                                   | 2.102 | 2.134 |
| ZFAND3  | chr6:37787248-38122399    | zinc finger AN1-type containing 3                                      | 1.73  | 2.722 |
| ZFP36L1 | chr14:69254371-69262960   | ZFP36 ring finger protein-like 1                                       | 1.614 | 2.273 |
| ZFPM1   | chr16:88520013-88601574   | zinc finger protein, FOG family member 1                               | 1.772 | 4.859 |
| ZFYVE1  | chr14:73436158-73493920   | zinc finger FYVE-type containing 1                                     | 1.332 | 2.078 |
| ZIC4    | chr3:147103834-147134506  | Zic family member 4                                                    | 0.524 | 0.248 |
| ZIC5    | chr13:100615274-100624178 | Zic family member 5                                                    | 0.472 | 0.457 |
| ZMIZ1   | chr10:80828538-81076285   | zinc finger MIZ-type containing 1                                      | 1.572 | 2.506 |
| ZMYM3   | chrX:70430034-70948962    | zinc finger MYM-type containing 3                                      | 0.404 | 0.188 |
| ZMYND15 | chr17:4643309-4649414     | zinc finger MYND-type containing 15                                    | 1.968 | 2.59  |
| ZMYND19 | chr9:140474737-140484937  | zinc finger MYND-type containing 19                                    | 2.045 | 2.372 |
| ZNF124  | chr1:247285276-247335531  | zinc finger protein 124                                                | 1.823 | 2.353 |
| ZNF143  | chr11:9482398-9550071     | zinc finger protein 143                                                | 1.87  | 2.147 |
| ZNF189  | chr9:104161162-104175491  | zinc finger protein 189                                                | 0.587 | 0.474 |
| ZNF204P | chr6:27325601-27343153    | zinc finger protein 204, pseudogene                                    | 0.679 | 0.33  |
| ZNF213  | chr16:3185056-3193170     | zinc finger protein 213                                                | 1.643 | 3.004 |
| ZNF219  | chr14:21538476-21572863   | zinc finger protein 219                                                | 0.325 | 0.233 |
| ZNF222  | chr19:44529493-44537262   | zinc finger protein 222                                                | 1.401 | 2.165 |
| ZNF277  | chr7:111846642-111996501  | zinc finger protein 277                                                | 0.684 | 0.458 |
| ZNF280C | chrX:129336672-129402922  | zinc finger protein 280C                                               | 1.592 | 2.071 |
| ZNF320  | chr19:53379424-53400900   | zinc finger protein 320                                                | 0.802 | 0.394 |
| ZNF333  | chr19:14800869-14834101   | zinc finger protein 333                                                | 1.995 | 3.593 |
| ZNF385B | chr2:180306710-180726232  | zinc finger protein 385B                                               | 0.476 | 0.411 |
| ZNF385D | chr3:21461996-21792885    | zinc finger protein 385D                                               | 0.593 | 0.384 |
| ZNF395  | chr8:28203101-28243977    | zinc finger protein 395                                                | 0.417 | 0.284 |
| ZNF425  | chr7:148799877-148823438  | zinc finger protein 425                                                | 2.045 | 3.391 |
| ZNF432  | chr19:52534477-52599027   | zinc finger protein 432                                                | 1.548 | 2.164 |
| ZNF433  | chr19:12098439-12188626   | zinc finger protein 433                                                | 1.57  | 4.591 |
| ZNF444  | chr19:56652381-56676006   | zinc finger protein 444                                                | 0.409 | 0.185 |
| ZNF449  | chrX:134478673-134497555  | zinc finger protein 449                                                | 1.629 | 2.301 |
| ZNF467  | chr7:149461300-149531063  | zinc finger protein 467                                                | 0.238 | 0.175 |
| ZNF512B | chr20:62571181-62601223   | zinc finger protein 512B                                               | 0.642 | 0.318 |
| ZNF518A | chr10:97889150-98031357   | zinc finger protein 518A                                               | 0.628 | 0.433 |
| ZNF552  | chr19:58258163-58427978   | zinc finger protein 552                                                | 0.627 | 0.373 |
| ZNF573  | chr19:38228982-38271190   | zinc finger protein 573                                                | 0.598 | 0.471 |
| ZNF598  | chr16:2047540-2059822     | zinc finger protein 598                                                | 1.473 | 2.103 |
| ZNF608  | chr5:123972609-124084487  | zinc finger protein 608                                                | 0.634 | 0.369 |
| ZNF618  | chr9:116638561-116818875  | zinc finger protein 618                                                | 0.341 | 0.214 |
| ZNF674  | chrX:46356911-46457838    | zinc finger protein 674                                                | 1.641 | 2.287 |
| ZNF697  | chr1:120161082-120190925  | zinc finger protein 697                                                | 2.713 | 4.593 |
| ZNF70   | chr22:24083042-24093279   | zinc finger protein 70                                                 | 1.901 | 2.563 |
| ZNF703  | chr8:37553300-37557527    | zinc finger protein 703                                                | 2.623 | 5.081 |
| ZNF76   | chr6:35227307-35264199    | zinc finger protein 76                                                 | 0.82  | 0.492 |
| ZNF883  | chr9:115759399-115774472  | zinc finger protein 883                                                | 0.649 | 0.239 |
| ZNHIT1  | chr7:100849257-100867473  | zinc finger HIT-type containing 1                                      | 0.512 | 0.418 |
| ZNRF2P2 | chr7:29685537-29791473    | zinc and ring finger 2 pseudogene 2                                    | 1.678 | 2.462 |
| ZRANB3  | chr2:135957252-136288806  | zinc finger RANBP2-type containing 3                                   | 0.763 | 0.473 |
| ZSWIM3  | chr20:44486219-44507769   | zinc finger SWIM-type containing 3                                     | 0.428 | 0.368 |
| ZSWIM4  | chr19:13906273-13943176   | zinc finger SWIM-type containing 4                                     | 2.245 | 5.177 |
| ZSWIM6  | chr5:60628099-60842127    | zinc finger SWIM-type containing 6                                     | 2.354 | 3.475 |
| ZWINT   | chr10:58117122-58121034   | ZW10 interacting kinetochore protein                                   | 0.878 | 0.157 |



Supplementary Table 2

## Deregulated genes in HepaRG cells exposed to APAP (Fold change&gt;10)

| Gene Symbol* | Gene Locus                | Fold change (5mM APAP) | Fold change (10 mM APAP) |
|--------------|---------------------------|------------------------|--------------------------|
| A1CF         | chr10:52559047-52645435   | 0.271                  | 0.031                    |
| AADAC        | chr3:151347319-151546276  | 0.322                  | 0.036                    |
| ABCA6        | chr17:67074817-67138015   | 0.212                  | 0.04                     |
| ABCB4        | chr7:87031171-87461646    | 0.164                  | 0.032                    |
| ABCC2        | chr10:101542178-101613520 | 0.33                   | 0.027                    |
| ABCC6P1      | chr16:18582506-18609629   | 0.26                   | 0.068                    |
| ABCC6P2      | chr16:14908173-14918610   | 0.239                  | 0.096                    |
| ABCG5        | chr2:44039610-44110328    | 0.057                  | 0.001                    |
| ABCG8        | chr2:44039610-44110328    | 0.033                  | 0.001                    |
| ACMSD        | chr2:135595889-135716915  | 0.173                  | 0.02                     |
| ACOT12       | chr5:80256507-81047072    | 0.144                  | 0.057                    |
| ACOX2        | chr3:58490862-58522929    | 0.12                   | 0.051                    |
| ACSM2A       | chr16:20462738-20498991   | 0.199                  | 0.026                    |
| ACSM2B       | chr16:20529072-20593323   | 0.209                  | 0.036                    |
| ACSM3        | chr16:20775311-20860990   | 0.255                  | 0.043                    |
| ACSM5        | chr16:20420855-20452618   | 0.267                  | 0.048                    |
| ACSS1        | chr20:24986865-25038818   | 0.056                  | 0.013                    |
| ACY3         | chr11:67410025-67418190   | 0.237                  | 0.032                    |
| ADH4         | chr4:100010007-100273917  | 0.038                  | 0.008                    |
| ADH6         | chr4:100010007-100273917  | 0.115                  | 0.007                    |
| AFM          | chr4:74347405-74395600    | 0.177                  | 0.021                    |
| AGMAT        | chr1:15853351-15911605    | 0.303                  | 0.057                    |
| AGMO         | chr7:15198958-15601645    | 0.304                  | 0.023                    |
| AGXT         | chr2:241797144-241818536  | 0.186                  | 0.061                    |
| AGXT2        | chr5:34997071-35048240    | 0.12                   | 0.015                    |
| AHSG         | chr3:186330849-186339107  | 0.302                  | 0.082                    |
| AKR1B10      | chr7:134212253-134226166  | 0.406                  | 0.033                    |
| AKR1C4       | chr10:5005453-5326522     | 0.177                  | 0.018                    |
| AKR1C6P      | chr10:4913858-4958540     | 0.062                  | 0.008                    |
| AKR1D1       | chr7:137749922-137803050  | 0.092                  | 0.023                    |
| ALB          | chr4:74269971-74287129    | 0.527                  | 0.099                    |
| ALDH1A1      | chr9:75515577-75568233    | 0.294                  | 0.061                    |
| ALDH3A1      | chr17:19641280-19651750   | 0.173                  | 0.048                    |
| ALDOB        | chr9:104182697-104211853  | 0.209                  | 0.047                    |
| ALOXE3       | chr17:7999217-8022234     | 13.02                  | 24.91                    |
| ALPL         | chr1:21835857-21904905    | 0.078                  | 0.022                    |
| ANG          | chr14:21151120-21168758   | 0.162                  | 0.091                    |
| ANGPTL3      | chr1:62920396-63154039    | 0.172                  | 0.035                    |
| ANKS4B       | chr16:21245015-21263750   | 0.211                  | 0.03                     |
| ANXA10       | chr4:169013687-169246998  | 0.116                  | 0.008                    |
| ANXA13       | chr8:124693033-124749647  | 0.071                  | 0.001                    |
| ANXA8L2      | chr10:47746875-47769716   | 0.205                  | 0.037                    |
| AOX1         | chr2:201450730-201537620  | 0.418                  | 0.097                    |
| AP1M2        | chr19:10683346-10697991   | 0.296                  | 0.057                    |
| APCS         | chr1:159557615-159558661  | 0.325                  | 0.03                     |
| APOA2        | chr1:161192082-161193418  | 0.487                  | 0.041                    |
| APOB         | chr2:21224129-21266962    | 0.459                  | 0.075                    |
| APOBEC3H     | chr22:39493228-39500072   | 0.133                  | 0.089                    |
| AQP7         | chr9:33384384-33402517    | 0.498                  | 0.096                    |
| AQP9         | chr15:58430407-58478110   | 0.267                  | 0.072                    |
| ARG1         | chr6:131894343-131949379  | 0.075                  | 0.014                    |
| ARHGEF16     | chr1:3371146-3397677      | 0.264                  | 0.055                    |
| ARHGEF2      | chr1:155916540-155953675  | 8.114                  | 10.63                    |
| ARL4C        | chr2:235401517-235405751  | 5.636                  | 11.52                    |
| ART4         | chr12:14939411-14996548   | 0.358                  | 0.043                    |
| ASGR1        | chr17:7076750-7082883     | 0.194                  | 0.044                    |
| ASNS         | chr7:97481428-97501854    | 12.93                  | 28.77                    |
| ASPA         | chr17:3377403-3403781     | 0.128                  | 0.069                    |
| ATF3         | chr1:212738675-212794119  | 11.82                  | 14.48                    |
| B3GNT3       | chr19:17905624-17924417   | 0.225                  | 0.033                    |
| BAAT         | chr9:104117616-104147287  | 0.071                  | 0.009                    |
| BBOX1        | chr11:27062508-27149354   | 0.238                  | 0.033                    |
| BDH1         | chr3:197236653-197300194  | 0.035                  | 0.024                    |
| BLNK         | chr10:97889150-98031357   | 0.15                   | 0.022                    |
| BTNL8        | chr5:180326076-180378350  | 0.255                  | 0.022                    |
| C14orf105    | chr14:57936054-57960609   | 0.535                  | 0.052                    |
| C2orf54      | chr2:241825388-241836249  | 0.009                  | 0.001                    |

|                 |                           |       |       |
|-----------------|---------------------------|-------|-------|
| <i>C4BPB</i>    | chr1:207262211-207273337  | 0.195 | 0.043 |
| <i>C5orf4</i>   | chr5:154197942-154256352  | 0.262 | 0.076 |
| <i>C6</i>       | chr5:41142247-41261540    | 0.243 | 0.045 |
| <i>C8A</i>      | chr1:57320442-57383894    | 0.338 | 0.07  |
| <i>CA9</i>      | chr9:35673914-35681154    | 0.038 | 0.065 |
| <i>CASP14</i>   | chr19:15160212-15169109   | 0.081 | 0.024 |
| <i>CCDC170</i>  | chr6:151815174-151942328  | 0.189 | 0.036 |
| <i>CCDC85B</i>  | chr11:65657289-65667997   | 4.946 | 12.03 |
| <i>CCL14</i>    | chr17:34310691-34329170   | 0.199 | 0.048 |
| <i>CCL15</i>    | chr17:34310691-34329170   | 0.199 | 0.048 |
| <i>CCL2</i>     | chr17:32582295-32584220   | 0.285 | 0.086 |
| <i>CD200</i>    | chr3:112051408-112081658  | 5.178 | 10.75 |
| <i>CDH1</i>     | chr16:68771194-68869444   | 0.252 | 0.054 |
| <i>CEACAM1</i>  | chr19:42901299-43156507   | 0.528 | 0.075 |
| <i>CES5A</i>    | chr16:55880065-55989943   | 0.582 | 0.082 |
| <i>CFHR2</i>    | chr1:196912933-196928356  | 0.13  | 0.027 |
| <i>CHAC1</i>    | chr15:41245545-41254871   | 17.53 | 35.5  |
| <i>CHST4</i>    | chr16:71481500-71645739   | 0.382 | 0.062 |
| <i>CHST8</i>    | chr19:34112860-34264414   | 3.956 | 10.42 |
| <i>CIDEC</i>    | chr3:9906149-10149915     | 0.235 | 0.035 |
| <i>CLDN14</i>   | chr21:37832919-37948867   | 0.026 | 0.05  |
| <i>CLRN3</i>    | chr10:129676113-129691211 | 0.085 | 0.004 |
| <i>CPA4</i>     | chr7:129932973-129964020  | 10.63 | 28.01 |
| <i>CPB2</i>     | chr13:46626982-46679211   | 0.39  | 0.061 |
| <i>CREB3L3</i>  | chr19:4153597-4173051     | 0.075 | 0.014 |
| <i>CRP</i>      | chr1:159682077-159726405  | 0.221 | 0.071 |
| <i>CST7</i>     | chr20:24922507-24942898   | 0.071 | 0.044 |
| <i>CTSS</i>     | chr1:150702671-150738433  | 0.508 | 0.096 |
| <i>CXCL1</i>    | chr4:74735108-74737019    | 0.359 | 0.043 |
| <i>CXCL10</i>   | chr4:76932332-77033955    | 0.315 | 0.038 |
| <i>CXCL2</i>    | chr4:74962750-74964999    | 0.274 | 0.052 |
| <i>CYP1A1</i>   | chr15:75011882-75017979   | 0.318 | 0.086 |
| <i>CYP21A1P</i> | chr6:31971726-31981050    | 0.15  | 0.048 |
| <i>CYP21A2</i>  | chr6:32006092-32077151    | 0.151 | 0.042 |
| <i>CYP2B6</i>   | chr19:41430169-41524301   | 0.167 | 0.057 |
| <i>CYP2B7P1</i> | chr19:41430169-41524301   | 0.167 | 0.057 |
| <i>CYP2C18</i>  | chr10:96442636-96495947   | 0.238 | 0.041 |
| <i>CYP2C19</i>  | chr10:96522462-96612671   | 0.253 | 0.049 |
| <i>CYP2C8</i>   | chr10:96796528-96829254   | 0.215 | 0.07  |
| <i>CYP2C9</i>   | chr10:96698384-96749148   | 0.178 | 0.052 |
| <i>CYP2E1</i>   | chr10:135238569-135392077 | 0.267 | 0.094 |
| <i>CYP3A4</i>   | chr7:99354582-99381904    | 0.207 | 0.044 |
| <i>CYP3A7</i>   | chr7:99282301-99332819    | 0.129 | 0.013 |
| <i>CYP4X1</i>   | chr1:47489239-47516423    | 0.098 | 0.019 |
| <i>CYP8B1</i>   | chr3:42913683-42917633    | 0.09  | 0.005 |
| <i>DAO</i>      | chr12:109270653-109294797 | 0.189 | 0.011 |
| <i>DBH</i>      | chr9:136501484-136525168  | 0.061 | 0.029 |
| <i>DCLK1</i>    | chr13:35516377-36705967   | 6.652 | 10.59 |
| <i>DDC</i>      | chr7:50526128-50633154    | 0.18  | 0.019 |
| <i>DIO1</i>     | chr1:54359860-54376759    | 0.291 | 0.076 |
| <i>DPYS</i>     | chr8:105391651-105482804  | 0.229 | 0.067 |
| <i>DUSP5</i>    | chr10:112257624-112271302 | 14.32 | 24.98 |
| <i>DUSP9</i>    | chrX:152890864-152916781  | 0.109 | 0.038 |
| <i>E2F8</i>     | chr11:19245609-19263202   | 0.778 | 0.044 |
| <i>ECM2</i>     | chr9:95059196-95432547    | 0.219 | 0.033 |
| <i>EDN2</i>     | chr1:41944445-41950344    | 0.071 | 0.018 |
| <i>EHHADH</i>   | chr3:184880688-184971886  | 0.263 | 0.065 |
| <i>EPS8L3</i>   | chr1:110292701-110306644  | 0.436 | 0.086 |
| <i>ESCO2</i>    | chr8:27590832-27662424    | 0.624 | 0.057 |
| <i>ESPN</i>     | chr1:6484847-6580121      | 0.15  | 0.07  |
| <i>ETNK2</i>    | chr1:204100176-204121307  | 0.168 | 0.069 |
| <i>F11</i>      | chr4:187181417-187422212  | 0.271 | 0.041 |
| <i>F13B</i>     | chr1:197007888-197036397  | 0.226 | 0.045 |
| <i>F5</i>       | chr1:169481191-169555840  | 0.362 | 0.048 |
| <i>FABP1</i>    | chr2:88422507-88427650    | 0.056 | 0.031 |
| <i>FAM222A</i>  | chr12:110151812-110211292 | 4.68  | 10.48 |
| <i>FAM65B</i>   | chr6:24804512-25004893    | 0.067 | 0.015 |
| <i>FETUB</i>    | chr3:186358148-186370797  | 0.254 | 0.074 |
| <i>FGA</i>      | chr4:155499904-155511897  | 0.234 | 0.038 |

|                |                           |       |       |
|----------------|---------------------------|-------|-------|
| <i>FGB</i>     | chr4:155484128-155493915  | 0.205 | 0.03  |
| <i>FGG</i>     | chr4:155525285-155533918  | 0.253 | 0.051 |
| <i>FMO3</i>    | chr1:171060010-171086959  | 0.242 | 0.055 |
| <i>FMO5</i>    | chr1:146626681-146767447  | 0.154 | 0.014 |
| <i>FOSL1</i>   | chr11:65657289-65667997   | 11.84 | 18.99 |
| <i>FRK</i>     | chr6:116252829-116567088  | 0.295 | 0.091 |
| <i>FYN</i>     | chr6:111981534-112194655  | 0.107 | 0.001 |
| <i>G6PC</i>    | chr17:41052813-41066450   | 0.109 | 0.034 |
| <i>GALNT15</i> | chr3:16216047-16273367    | 0.124 | 0.05  |
| <i>GALNT5</i>  | chr2:158114073-158169951  | 0.206 | 0.075 |
| <i>GAS2</i>    | chr11:22649821-22834547   | 0.218 | 0.078 |
| <i>GBA3</i>    | chr4:22694547-22821192    | 0.241 | 0.011 |
| <i>GDF15</i>   | chr19:18496967-18499986   | 8.279 | 16.48 |
| <i>GGT8P</i>   | chr2:91963332-91978189    | 0.185 | 0.095 |
| <i>GJB1</i>    | chrX:70430034-70948962    | 0.131 | 0.011 |
| <i>GJB5</i>    | chr1:35220647-35224113    | 13.31 | 81.92 |
| <i>GLYAT</i>   | chr11:58466955-58499480   | 0.036 | 0.004 |
| <i>GLYATL1</i> | chr11:58695101-58825925   | 0.027 | 0.005 |
| <i>GNMT</i>    | chr6:42928499-42981719    | 0.165 | 0.092 |
| <i>GPR1</i>    | chr2:207040041-207082771  | 10.85 | 11.96 |
| <i>GPX2</i>    | chr14:65381078-65569413   | 0.107 | 0.01  |
| <i>GRAMD3</i>  | chr5:125695787-125830209  | 0.374 | 0.084 |
| <i>GYG2</i>    | chrX:2746793-2801206      | 0.141 | 0.01  |
| <i>GYS2</i>    | chr12:21689122-21757865   | 0.118 | 0.041 |
| <i>HABP2</i>   | chr10:115310589-115423829 | 0.285 | 0.044 |
| <i>HAL</i>     | chr12:96366439-96390143   | 0.262 | 0.091 |
| <i>HAMP</i>    | chr19:35773409-35776045   | 0.669 | 0.075 |
| <i>HAO1</i>    | chr20:7826328-7921179     | 0.116 | 0.01  |
| <i>HAO2</i>    | chr1:119904920-119936755  | 0.026 | 0.008 |
| <i>HAP1</i>    | chr17:39873997-39890898   | 5.634 | 16.73 |
| <i>HCN4</i>    | chr15:73612199-73661605   | 13.02 | 20.23 |
| <i>HFE</i>     | chr6:26086547-26098258    | 6.392 | 14.11 |
| <i>HFE2</i>    | chr1:145413122-145417545  | 0.09  | 0.006 |
| <i>HGD</i>     | chr3:120347014-120401418  | 0.41  | 0.047 |
| <i>HMGCS2</i>  | chr1:120290618-120311555  | 0.106 | 0.014 |
| <i>HNF1A</i>   | chr12:121415244-121454300 | 0.298 | 0.07  |
| <i>HNF4A</i>   | chr20:42984440-43061485   | 0.146 | 0.02  |
| <i>HINMT</i>   | chr2:138721807-138773934  | 0.224 | 0.059 |
| <i>HOXA3</i>   | chr7:27145808-27170399    | 0.26  | 0.05  |
| <i>HPD</i>     | chr12:122277432-122326517 | 0.278 | 0.066 |
| <i>HPGD</i>    | chr4:175411122-175444086  | 0.621 | 0.093 |
| <i>HSD17B2</i> | chr16:82068857-82132139   | 0.118 | 0.012 |
| <i>HSPB2</i>   | chr11:111783459-111797595 | 0.397 | 0.036 |
| <i>HULC</i>    | chr6:8435855-8789203      | 0.077 | 0.032 |
| <i>ICOSLG</i>  | chr21:45642608-45660888   | 3.632 | 13.42 |
| <i>IFITM2</i>  | chr11:309531-311834       | 0.353 | 0.081 |
| <i>IGFBP3</i>  | chr7:45951843-45960871    | 5.6   | 12.48 |
| <i>IKBKE</i>   | chr1:206643585-206670223  | 0.163 | 0.046 |
| <i>IL1R2</i>   | chr2:102608305-102644884  | 0.163 | 0.051 |
| <i>IL22RA1</i> | chr1:24446190-24469775    | 0.381 | 0.065 |
| <i>IQGAP2</i>  | chr5:75699105-76003957    | 0.275 | 0.027 |
| <i>IRF6</i>    | chr1:209958856-209979520  | 0.175 | 0.064 |
| <i>ITGAM</i>   | chr16:31265166-31344213   | 0.311 | 0.087 |
| <i>ITIH2</i>   | chr10:7745197-7791483     | 0.533 | 0.092 |
| <i>IYD</i>     | chr6:150690027-150725765  | 0.306 | 0.06  |
| <i>KCNJ16</i>  | chr17:68071320-68131746   | 0.138 | 0.005 |
| <i>KCNK5</i>   | chr6:39151668-39197259    | 0.145 | 0.094 |
| <i>KISS1</i>   | chr1:204159468-204165619  | 0.146 | 0.021 |
| <i>KLHDC7A</i> | chr1:18807423-18812824    | 0.32  | 0.061 |
| <i>KLKB1</i>   | chr4:187135196-187179625  | 0.179 | 0.052 |
| <i>KNG1</i>    | chr3:186435097-186462199  | 0.414 | 0.088 |
| <i>KRT5</i>    | chr12:52908283-52917348   | 0.1   | 0.077 |
| <i>LAD1</i>    | chr1:201349965-201369053  | 0.342 | 0.039 |
| <i>LIN7A</i>   | chr12:81172104-81331866   | 0.625 | 0.067 |
| <i>LRRC31</i>  | chr3:169555611-169587742  | 0.514 | 0.024 |
| <i>LRRC73</i>  | chr6:43474702-43478081    | 6.217 | 10.5  |
| <i>MAFF</i>    | chr22:38597938-38612517   | 7.352 | 13.59 |
| <i>MAP2K6</i>  | chr17:67410837-67539093   | 0.23  | 0.048 |
| <i>MASP1</i>   | chr3:186933872-187009810  | 0.297 | 0.048 |

|                  |                           |       |       |
|------------------|---------------------------|-------|-------|
| <i>MAT1A</i>     | chr10:82031575-82049434   | 0.135 | 0.017 |
| <i>MLIP</i>      | chr6:53875386-54131495    | 0.096 | 0.012 |
| <i>MMP10</i>     | chr11:102641232-102651359 | 57.64 | 113.1 |
| <i>MTMR3</i>     | chr22:30279111-30573062   | 0.117 | 0.072 |
| <i>MTTP</i>      | chr4:100485239-100545154  | 0.073 | 0.007 |
| <i>MYLK</i>      | chr3:123304402-123603149  | 0.24  | 0.051 |
| <i>NCAM1</i>     | chr11:112831968-113149158 | 5.652 | 11.79 |
| <i>NCKAP5</i>    | chr2:133429371-134326069  | 0.605 | 0.069 |
| <i>NGFR</i>      | chr17:47572654-47592382   | 10.29 | 35.37 |
| <i>NQO1</i>      | chr16:69743303-69760533   | 0.139 | 0.077 |
| <i>NR1H4</i>     | chr12:100867550-100958177 | 0.285 | 0.039 |
| <i>NR1I2</i>     | chr3:119499330-119537651  | 0.184 | 0.029 |
| <i>NR1I3</i>     | chr1:161195562-161208000  | 0.136 | 0.033 |
| <i>NRXN2</i>     | chr11:64373645-64490660   | 0.132 | 0.044 |
| <i>OLFML3</i>    | chr1:114521659-114524875  | 0.102 | 0.029 |
| <i>ONECUT1</i>   | chr15:53042094-53082353   | 0.159 | 0.051 |
| <i>OTC</i>       | chrX:38208972-38282141    | 0.261 | 0.037 |
| <i>PAH</i>       | chr12:103232103-103311381 | 0.304 | 0.027 |
| <i>PCK1</i>      | chr20:56136136-56141513   | 0.016 | 0.002 |
| <i>PDZD3</i>     | chr11:119056163-119060932 | 0.202 | 0.021 |
| <i>PDZK1</i>     | chr1:145726914-145764206  | 0.188 | 0.028 |
| <i>PGLYRP2</i>   | chr19:15579456-15591056   | 0.28  | 0.089 |
| <i>PIK3C2G</i>   | chr12:18395539-18890993   | 0.194 | 0.004 |
| <i>PIPOX</i>     | chr17:27280400-27384367   | 0.159 | 0.029 |
| <i>PLA2G12B</i>  | chr10:74694325-74714673   | 0.059 | 0.009 |
| <i>PLA2G1B</i>   | chr12:120759913-120765592 | 0.41  | 0.001 |
| <i>PLGLB2</i>    | chr2:88047605-88285309    | 0.133 | 0.063 |
| <i>PMCHL2</i>    | chr5:70648324-70741726    | 0.253 | 0.01  |
| <i>PMEPA1</i>    | chr20:56223447-56286592   | 4.545 | 14.45 |
| <i>POLE2</i>     | chr14:50110269-50155098   | 0.789 | 0.089 |
| <i>PON1</i>      | chr7:94927668-94953884    | 0.294 | 0.069 |
| <i>PPP1R14D</i>  | chr15:41107642-41120907   | 0.172 | 0.018 |
| <i>PPP1R15A</i>  | chr19:49375648-49379319   | 6.704 | 16.72 |
| <i>PRKAR2B</i>   | chr7:106685177-106802256  | 0.146 | 0.095 |
| <i>PRODH2</i>    | chr19:36283214-36304201   | 0.303 | 0.058 |
| <i>PSAT1</i>     | chr9:80912058-80945009    | 10.07 | 17.65 |
| <i>PTGR1</i>     | chr9:114287446-114362135  | 0.332 | 0.079 |
| <i>RAB17</i>     | chr2:238482962-238500223  | 0.237 | 0.042 |
| <i>RASD1</i>     | chr17:17397752-17399709   | 10.77 | 12.52 |
| <i>RBP5</i>      | chr12:7247145-7311530     | 0.172 | 0.056 |
| <i>RCN3</i>      | chr19:50030062-50046890   | 0.169 | 0.066 |
| <i>RDH16</i>     | chr12:57345215-57351418   | 0.072 | 0.069 |
| <i>RFX2</i>      | chr19:5978413-6110664     | 5.833 | 15.26 |
| <i>RGN</i>       | chrX:46937595-46953067    | 0.225 | 0.039 |
| <i>RGPD1</i>     | chr2:88047605-88285309    | 0.18  | 0.022 |
| <i>RGS16</i>     | chr1:182567757-182573548  | 6.437 | 21.48 |
| <i>RHEBL1</i>    | chr12:49458467-49463775   | 5.031 | 11.02 |
| <i>RORC</i>      | chr1:151778546-151826173  | 0.178 | 0.073 |
| <i>RRM2</i>      | chr2:10260965-10271546    | 0.566 | 0.023 |
| <i>RTP4</i>      | chr3:187086167-187089369  | 0.198 | 0.048 |
| <i>SARDH</i>     | chr9:136526468-136605077  | 0.096 | 0.035 |
| <i>SCGN</i>      | chr6:25652428-25702011    | 0.281 | 0.033 |
| <i>SCTR</i>      | chr2:120189407-120282028  | 0.242 | 0.072 |
| <i>SDK1</i>      | chr7:3341079-4308631      | 0.144 | 0.011 |
| <i>SDPR</i>      | chr2:192699031-192712006  | 0.352 | 0.086 |
| <i>SDS</i>       | chr12:113830250-113841738 | 0.403 | 0.072 |
| <i>SEC16B</i>    | chr1:177897800-177942446  | 0.295 | 0.073 |
| <i>SELENBP1</i>  | chr1:151336776-151345210  | 0.258 | 0.094 |
| <i>SELL</i>      | chr1:169659805-169681113  | 0.308 | 0.092 |
| <i>SELPLG</i>    | chr12:109015679-109030486 | 5.462 | 15.41 |
| <i>SERPINA10</i> | chr14:94640633-94763483   | 0.089 | 0.016 |
| <i>SERPINA4</i>  | chr14:95027771-95036243   | 0.442 | 0.075 |
| <i>SERPINA6</i>  | chr14:94770584-94789693   | 0.382 | 0.056 |
| <i>SERPINA7</i>  | chrX:105259681-105282739  | 0.232 | 0.047 |
| <i>SERPIND1</i>  | chr22:21061976-21245501   | 0.413 | 0.096 |
| <i>SERPINE1</i>  | chr7:100770369-100782547  | 11.05 | 30.46 |
| <i>SERPINF2</i>  | chr17:1646129-1658559     | 0.237 | 0.047 |
| <i>SESN2</i>     | chr1:28585962-28609002    | 5.359 | 10.89 |
| <i>SGK2</i>      | chr20:42187634-42215583   | 0.216 | 0.053 |

|            |                           |       |       |
|------------|---------------------------|-------|-------|
| SLC10A1    | chr14:70242551-70264793   | 0.181 | 0.026 |
| SLC15A1    | chr13:99336054-99404929   | 0.14  | 0.013 |
| SLC15A3    | chr11:60691912-60719257   | 0.357 | 0.079 |
| SLC17A4    | chr6:25754926-25781403    | 0.246 | 0.055 |
| SLC1A4     | chr2:65215578-65251000    | 6.882 | 12.79 |
| SLC22A18AS | chr11:2909326-2946476     | 0.311 | 0.066 |
| SLC22A7    | chr6:43265713-43276530    | 0.085 | 0.03  |
| SLC28A1    | chr15:85427784-85489200   | 0.244 | 0.047 |
| SLC2A14    | chr12:7965832-8130438     | 0.099 | 0.018 |
| SLC2A2     | chr3:170711973-170744768  | 0.068 | 0.003 |
| SLC38A3    | chr3:50242691-50258494    | 0.162 | 0.078 |
| SLC47A2    | chr17:19581293-19620043   | 0.119 | 0.064 |
| SLC5A9     | chr1:48688331-48714511    | 0.14  | 0.027 |
| SLC6A17    | chr1:110693131-110744823  | 7.985 | 15.86 |
| SLC6A9     | chr1:44457279-44506190    | 24.2  | 41.11 |
| SLC7A11    | chr4:138948576-139163503  | 20.34 | 38.91 |
| SLC7A5     | chr16:87863628-87903100   | 14.15 | 22.59 |
| SLC9A1     | chr1:27425298-27481869    | 5.382 | 13.79 |
| SLCO1B1    | chr12:21279103-21548371   | 0.354 | 0.069 |
| SLCO2B1    | chr11:74862031-74917445   | 0.107 | 0.03  |
| SLCO5A1    | chr8:70581844-70747299    | 9.167 | 19.65 |
| SMLR1      | chr6:131148439-131384462  | 0.151 | 0.018 |
| SMPX       | chrX:21724089-21788953    | 0.244 | 0.055 |
| SORBS2     | chr4:186506597-186877870  | 0.221 | 0.051 |
| SPC24      | chr19:11256178-11266639   | 0.582 | 0.064 |
| SPHK1      | chr17:74305440-74383941   | 4.21  | 11.48 |
| SPINK1     | chr5:147204142-147211260  | 0.491 | 0.07  |
| SPINT3     | chr20:44141100-44144264   | 0.273 | 0.001 |
| SPP1       | chr4:88896455-88904563    | 0.134 | 0.044 |
| SSTR5      | chr16:1114081-1131454     | 0.184 | 0.046 |
| ST6GAL1    | chr3:186648314-186796459  | 0.363 | 0.038 |
| STAC2      | chr17:37366788-37382040   | 0.116 | 0.061 |
| SULT1A1    | chr16:28616907-28634907   | 0.253 | 0.072 |
| SULT1A2    | chr16:28603263-28608391   | 0.354 | 0.094 |
| SULT1B1    | chr4:70591804-70626430    | 0.067 | 0.003 |
| SULT1C2    | chr2:108905094-108926371  | 0.238 | 0.059 |
| SULT2A1    | chr19:48373722-48389654   | 0.038 | 0.002 |
| SUSD3      | chr9:95820985-95847555    | 0.207 | 0.058 |
| SYP        | chrX:49044264-49056661    | 6.129 | 12.57 |
| TAT        | chr16:71481500-71645739   | 0.104 | 0.031 |
| TENC1      | chr12:53436972-53473204   | 0.217 | 0.083 |
| THPO       | chr3:184089772-184097640  | 0.254 | 0.036 |
| TJP3       | chr19:3708334-3761673     | 0.346 | 0.071 |
| TM4SF4     | chr3:149192361-149221181  | 0.139 | 0.012 |
| TMEM176A   | chr7:150488375-150502208  | 0.374 | 0.099 |
| TNFRSF9    | chr1:7975930-8003225      | 20.11 | 27.5  |
| TNFSF10    | chr3:172223297-172241306  | 0.239 | 0.082 |
| TNXA       | chr6:31971726-31981050    | 0.122 | 0.056 |
| TPRXL      | chr3:13978806-14107481    | 1.995 | 24.81 |
| TRIB3      | chr20:361307-378203       | 12.08 | 20.94 |
| TTPA       | chr8:63971799-63998645    | 0.194 | 0.036 |
| TTR        | chr18:29171729-29178986   | 0.098 | 0.016 |
| UBASH3B    | chr11:122526397-122685187 | 6.496 | 11.52 |
| UBD        | chr6:29520359-29527702    | 0.639 | 0.088 |
| UGT1A1-9   | chr2:234526290-234681951  | 0.452 | 0.08  |
| UGT2A3     | chr4:69794176-69817509    | 0.247 | 0.035 |
| UGT2B15    | chr4:69382873-69536494    | 0.23  | 0.033 |
| UGT2B4     | chr4:70345882-70361626    | 0.183 | 0.044 |
| UGT2B7     | chr4:69962192-70267587    | 0.351 | 0.069 |
| UNC5B      | chr10:72972291-73062635   | 25.96 | 72.69 |
| UPP1       | chr7:48128007-48148330    | 5.027 | 16.78 |
| UPP2       | chr2:158733116-158992666  | 1.437 | 10.27 |
| VIL1       | chr2:219283837-219461158  | 0.427 | 0.057 |
| VNN1       | chr6:133001996-133041070  | 0.238 | 0.052 |
| VNN3       | chr6:133043925-133055904  | 0.091 | 0.007 |

Supplementary Table 3 Top 10 significant canonical pathways identified by Ingenuity Pathways Analysis using 339 deregulated genes

| Ingenuity Canonical Pathways          | -log <sub>10</sub> (B-H p-value) | Ratio    | Downregulated | No change  | Upregulated | No overlap with dataset | Molecules                                                                                                                                                                                                                           |
|---------------------------------------|----------------------------------|----------|---------------|------------|-------------|-------------------------|-------------------------------------------------------------------------------------------------------------------------------------------------------------------------------------------------------------------------------------|
| PXR/RXR Activation                    | 19.2                             | 1.96E-01 | 27/136 (20%)  | 0/130 (0%) | 0/138 (0%)  | 111/138 (80%)           | ANG1, ABCG5, ABCG8, SLC10A1, APOB, NR1H4, APOA2, ABCG2, SLC22A7, HNF1A, CYP9B1, MTP, PON1, NR12, HNF4A, BAAT, TTR, UGT2B4, AHSG, FETUB, SERPINF2, SULT2A1, ALB, ABCB4, G6PC, SLC01B1, FGA                                           |
| Nicotine Degradation II               | 15.7                             | 2.60E-01 | 19/73 (26%)   | 0/73 (0%)  | 0/73 (0%)   | 54/73 (74%)             | CYP3A7, FMO3, CYP1A1, UGT2B4, UGT2B7, CYP2C18, CYP2C9, FMO5, UGT1A1, CYP2C19, UGT2B15, CYP3A4, UGT2A3, CYP2E1, NADP, CYP4X1, CYP2B6, AOX1, CYP2C8                                                                                   |
| Melatonin Degradation I               | 15.2                             | 2.65E-01 | 18/68 (26%)   | 0/68 (0%)  | 0/68 (0%)   | 50/68 (74%)             | CYP3A7, CYP1A1, UGT2B4, UGT2B7, CYP2C18, CYP2C9, UGT1A1, CYP2C19, UGT2B15, SULT1A2, UGT2A3, CYP3A4, CYP2E1, SULT1A1, CYP4X1, CYP2B6, SULT1B1, CYP2C8                                                                                |
| LPS/L-1 Mediated Inhibition of R      | 15.2                             | 1.25E-01 | 27/224 (12%)  | 0/224 (0%) | 1/224 (0%)  | 196/224 (88%)           | ABCG8, CYP3A7, ABCG5, CHST4, SLC10A1, NR1H4, ABCG2, CYP2C9, FMO5, HMGCS2, SULT1A2, CYP2C19, IL1R2, ALDH1A1, NR12, NGFR, NR13, FABP1, ALDH3A1, FMO3, SULT1C2, ACOX2, SULT2A1, CYP3A4, SULT1A1, CYP2B6, SULT1B1, CYP2C8               |
| Xenobiotic Metabolism Signaling       | 13.9                             | 1.96E-01 | 29/274 (11%)  | 0/274 (0%) | 0/274 (0%)  | 245/274 (89%)           | MAP2K6, CYP3A7, CYP1A1, FMO3, CHST4, UGT2B4, SULT1C2, UGT2B7, ABCG2, NOD1, PKC32G, CYP2C8, FMO6, UGT1A1, SULT2A1, CYP2C19, UGT2B15, SULT1A2, ALDH1A1, CYP3A4, NR12, SULT1A1, NR13, CESSA, CYP2B6, SLC01B1, ALDH3A1, SULT1B1, CYP2C8 |
| Superpathway of Melatonin Degradation | 13.8                             | 2.20E-01 | 18/92 (22%)   | 0/92 (0%)  | 0/92 (0%)   | 64/92 (78%)             | CYP3A7, CYP1A1, UGT2B4, UGT2B7, CYP2C18, CYP2C9, UGT1A1, CYP2C19, UGT2B15, SULT1A2, UGT2A3, CYP3A4, CYP2E1, SULT1A1, CYP4X1, CYP2B6, SULT1B1, CYP2C8                                                                                |
| Nicotine Degradation III              | 13.8                             | 2.71E-01 | 16/99 (27%)   | 0/99 (0%)  | 0/99 (0%)   | 43/99 (73%)             | CYP3A7, CYP1A1, UGT2B4, UGT2B7, CYP2C18, CYP2C9, UGT1A1, CYP2C19, UGT2B15, UGT2A3, CYP3A4, CYP2E1, CYP4X1, CYP2B6, AOX1, CYP2C8                                                                                                     |
| PXR/RXR Activation                    | 12.4                             | 2.22E-01 | 16/72 (22%)   | 0/72 (0%)  | 0/72 (0%)   | 56/72 (78%)             | CYP3A7, ABCG2, CYP2C9, HMGCS2, UGT1A1, SULT2A1, CYP2C19, ALDH1A1, PRKAR2B, CYP3A4, NR12, NR13, G6PC, CYP2B6, HNF4A, CYP2C8                                                                                                          |
| Estrogen Biosynthesis                 | 11.2                             | 2.77E-01 | 13/47 (28%)   | 0/47 (0%)  | 0/47 (0%)   | 34/47 (72%)             | CYP3A7, CYP1A1, CYP2C18, CYP2C9, CYP2C19, CYP3A4, CYP2E1, NADP, CYP4X1, CYP2B6, AKR1C4, HSD17B2, CYP2C8                                                                                                                             |
| Acute Phase Response Signaling        | 11.2                             | 1.23E-01 | 19/171 (11%)  | 0/171 (0%) | 2/171 (1%)  | 150/171 (88%)           | MAP2K6, HAMP, TTR, C4BPB, APOA2, AHSG, KIBKE, HNF1A, SERPINF2, FGG, SERPND1, KLKB1, ALB, ITIH2, APC5, NGFR, CRP, FGB, FGA, SERPINE1, RBP5                                                                                           |

**Supplementary Table 4****Deregulated miRNAs in HepaRG cells exposed to APAP (Fold changes>2)**

| <b>miRNAs*</b>   | <b>Fold change (5mM APAP)</b> | <b>Fold change (10 mM APAP)</b> |
|------------------|-------------------------------|---------------------------------|
| hsa-miR-7974     | 0.352                         | 0.101                           |
| hsa-miR-216b-5p  | 0.731                         | 0.164                           |
| hsa-miR-122-5p   | 0.685                         | 0.201                           |
| hsa-miR-194-5p   | 0.776                         | 0.293                           |
| hsa-miR-194-3p   | 0.679                         | 0.297                           |
| hsa-miR-210-5p   | 0.474                         | 0.316                           |
| hsa-miR-30b-3p   | 0.622                         | 0.32                            |
| hsa-miR-130b-5p  | 0.675                         | 0.335                           |
| hsa-miR-122-3p   | 0.938                         | 0.348                           |
| hsa-miR-33b-3p   | 0.435                         | 0.358                           |
| hsa-miR-29b-1-5p | 0.54                          | 0.396                           |
| hsa-miR-185-5p   | 0.65                          | 0.421                           |
| hsa-miR-192-3p   | 0.571                         | 0.448                           |
| hsa-miR-1268a    | 0.769                         | 0.458                           |
| hsa-miR-3605-3p  | 0.593                         | 0.462                           |
| hsa-miR-1268b    | 0.773                         | 0.464                           |
| hsa-miR-192-5p   | 0.863                         | 0.465                           |
| hsa-miR-128-1-5p | 0.658                         | 0.469                           |
| hsa-miR-92b-3p   | 0.604                         | 0.482                           |
| hsa-miR-181d-5p  | 1.366                         | 2.049                           |
| hsa-miR-221-5p   | 1.38                          | 2.08                            |
| hsa-miR-4792     | 1.775                         | 2.098                           |
| hsa-miR-199a-3p  | 1.76                          | 2.103                           |
| hsa-miR-877-5p   | 1.84                          | 2.12                            |
| hsa-miR-129-5p   | 0.875                         | 2.156                           |
| hsa-miR-143-3p   | 1.748                         | 2.234                           |
| hsa-miR-10b-5p   | 1.78                          | 2.306                           |
| hsa-miR-3613-3p  | 1.783                         | 2.351                           |
| hsa-miR-7705     | 2.6                           | 2.44                            |
| hsa-miR-320a     | 1.688                         | 2.481                           |
| hsa-miR-1290     | 2.633                         | 2.52                            |
| hsa-miR-887-3p   | 1.641                         | 2.538                           |
| hsa-miR-449a     | 1.379                         | 2.586                           |
| hsa-miR-7704     | 1.611                         | 2.703                           |
| hsa-miR-4454     | 1.833                         | 2.75                            |
| hsa-miR-3144-3p  | 2.166                         | 2.933                           |
| hsa-miR-3614-5p  | 3.68                          | 3.12                            |
| hsa-miR-139-5p   | 2.366                         | 3.133                           |
| hsa-miR-19b-3p   | 2.097                         | 3.236                           |
| hsa-miR-3065-5p  | 2.312                         | 3.564                           |
| hsa-miR-224-5p   | 2.121                         | 3.737                           |
| hsa-miR-19a-3p   | 2.745                         | 4.187                           |
| hsa-miR-1246     | 6.382                         | 5.994                           |
| hsa-miR-320b     | 3.001                         | 6.75                            |
| hsa-miR-320c     | 2.967                         | 7.557                           |
| hsa-miR-4485-3p  | 9.741                         | 8.451                           |
| hsa-miR-320d     | 3.5                           | 10.65                           |

**Supplementary Table 5** *In Silico* analysis to identify the miRNA-targeting genes using miRTar.Human database

| miRNA name*      | Target genes#   | Target transcript† | Target position‡                 |
|------------------|-----------------|--------------------|----------------------------------|
| hsa-miR-10b-5p   | <i>ALPL</i>     | NM_001127501       | 2013–34                          |
| hsa-miR-10b-5p   | <i>ANXA13</i>   | NM_001003954       | 1158–77                          |
| hsa-miR-10b-5p   | <i>BDH1</i>     | NM_203315          | 1390–411                         |
| hsa-miR-10b-5p   | <i>CHST4</i>    | NM_005769          | 1892–913                         |
| hsa-miR-10b-5p   | <i>ECM2</i>     | BC036806           | 1301–19                          |
| hsa-miR-10b-5p   | <i>ETNK2</i>    | AB073608           | 1167–87                          |
| hsa-miR-10b-5p   | <i>IYD</i>      | NM_203395          | 1853–71                          |
| hsa-miR-10b-5p   | <i>MTMR3</i>    | NM_021090          | 5334–53;5590–611                 |
| hsa-miR-10b-5p   | <i>SDPR</i>     | NM_004657          | 2855–73                          |
| hsa-miR-10b-5p   | <i>SLC10A1</i>  | BC069799           | 1275–96                          |
| hsa-miR-10b-5p   | <i>VNN1</i>     | AJ132099           | 2058–78                          |
| hsa-miR-122-5p   | <i>GPR1</i>     | NM_005279          | 2071–89                          |
| hsa-miR-122-5p   | <i>MAFF</i>     | NM_012323          | 2197–215                         |
| hsa-miR-122-5p   | <i>NCAM1</i>    | NM_181351          | 3179–200                         |
| hsa-miR-122-5p   | <i>RGS16</i>    | NM_002928          | 1309–29                          |
| hsa-miR-122-5p   | <i>SESN2</i>    | NM_031459          | 2181–202                         |
| hsa-miR-122-5p   | <i>SLC7A11</i>  | NM_014331          | 6525–43                          |
| hsa-miR-122-5p   | <i>SLC7A5</i>   | NM_003486          | 4105–26                          |
| hsa-miR-122-5p   | <i>SLC9A1</i>   | NM_003047          | 3557–78;3803–24;3902–23;4293–314 |
| hsa-miR-122-5p   | <i>SLCO5A1</i>  | AK022760           | 3524–45                          |
| hsa-miR-1246     | <i>HMGCS2</i>   | NM_005518          | 1580–98                          |
| hsa-miR-1268a    | <i>MAFF</i>     | NM_012323          | 763–80                           |
| hsa-miR-1268a    | <i>SLC6A9</i>   | NM_001024845       | 2229–46                          |
| hsa-miR-1268a    | <i>UNC5B</i>    | AB096256           | 3664–81                          |
| hsa-miR-128-1-5p | <i>CPA4</i>     | NM_016352          | 1696–717                         |
| hsa-miR-128-1-5p | <i>DCLK1</i>    | BC152456           | 3460–82                          |
| hsa-miR-128-1-5p | <i>HFE</i>      | NM_000410          | 1216–32                          |
| hsa-miR-128-1-5p | <i>ICOSLG</i>   | NM_015259          | 1372–88;2986–3007                |
| hsa-miR-128-1-5p | <i>NCAM1</i>    | NM_181351          | 4438–58                          |
| hsa-miR-128-1-5p | <i>NGFR</i>     | NM_002507          | 1826–45                          |
| hsa-miR-128-1-5p | <i>SLC1A4</i>   | BC026216           | 2378–99                          |
| hsa-miR-128-1-5p | <i>SLC6A17</i>  | NM_001010898       | 6017–37                          |
| hsa-miR-128-1-5p | <i>SLC7A11</i>  | NM_014331          | 9028–46                          |
| hsa-miR-128-1-5p | <i>SLC7A5</i>   | NM_003486          | 4358–78                          |
| hsa-miR-128-1-5p | <i>TPRXL</i>    | AK092426           | 1452–71;1109–26                  |
| hsa-miR-128-1-5p | <i>ASNS</i>     | M15798             | 1774–94                          |
| hsa-miR-1290     | <i>HNMT</i>     | AK301462           | 814–32                           |
| hsa-miR-1290     | <i>MTMR3</i>    | NM_021090          | 4867–85                          |
| hsa-miR-1290     | <i>PLGLB2</i>   | NM_002665          | 552–73                           |
| hsa-miR-129-5p   | <i>ABCA6</i>    | BC070125           | 809–29                           |
| hsa-miR-129-5p   | <i>MTTP</i>     | NM_000253          | 3615–36                          |
| hsa-miR-129-5p   | <i>PIPOX</i>    | NM_016518          | 2140–161                         |
| hsa-miR-130b-5p  | <i>MAFF</i>     | NM_012323          | 1164–85                          |
| hsa-miR-130b-5p  | <i>SESN2</i>    | NM_031459          | 1957–78                          |
| hsa-miR-130b-5p  | <i>SLC7A11</i>  | NM_014331          | 6520–41                          |
| hsa-miR-130b-5p  | <i>UPP2</i>     | AY225131           | 1476–97                          |
| hsa-miR-139-5p   | <i>ALDH1A1</i>  | BC001505           | 1898–919                         |
| hsa-miR-139-5p   | <i>CDH1</i>     | NM_004360          | 4660–79                          |
| hsa-miR-139-5p   | <i>HNMT</i>     | NM_006895          | 2138–59                          |
| hsa-miR-139-5p   | <i>MYLK</i>     | NM_053025          | 7764–85                          |
| hsa-miR-139-5p   | <i>SERPIND1</i> | NM_000185          | 1774–95                          |
| hsa-miR-139-5p   | <i>ST6GAL1</i>  | NM_173217          | 2411–32                          |
| hsa-miR-139-5p   | <i>TNFSF10</i>  | AK296085           | 1599–619                         |
| hsa-miR-143-3p   | <i>MASP1</i>    | NM_001031849       | 1528–49                          |
| hsa-miR-181d-5p  | <i>ACSS1</i>    | NM_032501          | 3661–82                          |
| hsa-miR-181d-5p  | <i>AQP9</i>     | NM_020980          | 2352–72                          |
| hsa-miR-181d-5p  | <i>IYD</i>      | NM_203395          | 3683–705                         |
| hsa-miR-181d-5p  | <i>KCNK5</i>    | NM_003740          | 3156–76                          |
| hsa-miR-181d-5p  | <i>SLC5A9</i>   | AK131200           | 2335–56                          |
| hsa-miR-185-5p   | <i>CPA4</i>     | NM_016352          | 1825–46                          |
| hsa-miR-185-5p   | <i>HCN4</i>     | AJ132429           | 4198–219;4907–26;4955–76         |
| hsa-miR-185-5p   | <i>HFE</i>      | NM_000410          | 2003–24                          |



|                 |                 |              |                         |
|-----------------|-----------------|--------------|-------------------------|
| hsa-miR-185-5p  | <i>NCAM1</i>    | NM_181351    | 5316-37                 |
| hsa-miR-185-5p  | <i>RGS16</i>    | NM_002928    | 917-38                  |
| hsa-miR-185-5p  | <i>SESN2</i>    | NM_031459    | 2202-23                 |
| hsa-miR-185-5p  | <i>SLCO5A1</i>  | AK022760     | 3383-402                |
| hsa-miR-185-5p  | <i>SYP</i>      | NM_003179    | 1321-41                 |
| hsa-miR-192-3p  | <i>DUSP5</i>    | NM_004419    | 2045-66                 |
| hsa-miR-192-3p  | <i>ICOSLG</i>   | NM_015259    | 2624-45                 |
| hsa-miR-192-5p  | <i>ARL4C</i>    | BC089043     | 1846-66                 |
| hsa-miR-192-5p  | <i>ATF3</i>     | NM_001030287 | 1480-501                |
| hsa-miR-192-5p  | <i>NGFR</i>     | NM_002507    | 1980-2001               |
| hsa-miR-192-5p  | <i>PSAT1</i>    | NM_021154    | 1466-85                 |
| hsa-miR-194-3p  | <i>ARHGEF2</i>  | NM_004723    | 3002-23                 |
| hsa-miR-194-3p  | <i>ARL4C</i>    | AJ579850     | 2580-601                |
| hsa-miR-194-3p  | <i>FOSL1</i>    | NM_005438    | 1172-92;1417-38         |
| hsa-miR-194-3p  | <i>HAP1</i>     | NM_177977    | 3381-401                |
| hsa-miR-194-3p  | <i>ICOSLG</i>   | NM_015259    | 1365-86;1625-46         |
| hsa-miR-194-3p  | <i>MAFF</i>     | NM_012323    | 1772-93                 |
| hsa-miR-194-3p  | <i>NCAM1</i>    | NM_001076682 | 3479-98                 |
| hsa-miR-194-3p  | <i>NGFR</i>     | NM_002507    | 2188-209                |
| hsa-miR-194-3p  | <i>RFX2</i>     | AK024288     | 2161-82                 |
| hsa-miR-194-3p  | <i>SERPINE1</i> | BC010860     | 1656-77                 |
| hsa-miR-194-3p  | <i>SLC1A4</i>   | BC026216     | 4499-520                |
| hsa-miR-194-3p  | <i>SLC6A17</i>  | NM_001010898 | 5426-47;5565-86;6014-35 |
| hsa-miR-194-3p  | <i>SLC7A5</i>   | NM_003486    | 3575-600                |
| hsa-miR-199a-3p | <i>PLGLB2</i>   | NM_002665    | 2333-54                 |
| hsa-miR-199a-3p | <i>SGK2</i>     | NM_016276    | 1511-29                 |
| hsa-miR-210-5p  | <i>HCN4</i>     | AJ132429     | 4791-812                |
| hsa-miR-210-5p  | <i>IGFBP3</i>   | X64875       | 1400-21                 |
| hsa-miR-210-5p  | <i>NCAM1</i>    | NM_181351    | 2992-3013               |
| hsa-miR-210-5p  | <i>NGFR</i>     | NM_002507    | 2440-61                 |
| hsa-miR-224-5p  | <i>CDH1</i>     | NM_004360    | 3988-09                 |
| hsa-miR-224-5p  | <i>CYP3A4</i>   | NM_017460    | 2214-33                 |
| hsa-miR-224-5p  | <i>DIO1</i>     | NM_000792    | 1776-95                 |
| hsa-miR-224-5p  | <i>IFITM2</i>   | NM_006435    | 710-29                  |
| hsa-miR-224-5p  | <i>KLHDC7A</i>  | NM_152375    | 2887-905                |
| hsa-miR-224-5p  | <i>MTMR3</i>    | NM_021090    | 5091-112                |
| hsa-miR-224-5p  | <i>OLFML3</i>   | NM_020190    | 1658-79                 |
| hsa-miR-224-5p  | <i>SDS</i>      | BC020750     | 1002-19                 |
| hsa-miR-224-5p  | <i>SLC47A2</i>  | NM_001099646 | 2077-98                 |
| hsa-miR-3065-5p | <i>DDC</i>      | NM_000790    | 1759-80                 |
| hsa-miR-3065-5p | <i>ECM2</i>     | BC036806     | 1081-102                |
| hsa-miR-30b-3p  | <i>ARL4C</i>    | BC089043     | 1360-81                 |
| hsa-miR-30b-3p  | <i>CPA4</i>     | NM_016352    | 2096-117                |
| hsa-miR-30b-3p  | <i>HAP1</i>     | NM_177977    | 2275-96                 |
| hsa-miR-30b-3p  | <i>MAFF</i>     | NM_012323    | 1102-23                 |
| hsa-miR-30b-3p  | <i>NGFR</i>     | NM_002507    | 1705-26                 |
| hsa-miR-30b-3p  | <i>SLC7A5</i>   | NM_003486    | 1709-28                 |
| hsa-miR-30b-3p  | <i>SYP</i>      | NM_003179    | 1334-55                 |
| hsa-miR-30b-3p  | <i>TNFRSF9</i>  | NM_001561    | 1296-317                |
| hsa-miR-30b-3p  | <i>UNC5B</i>    | AB096256     | 3324-45                 |
| hsa-miR-3144-3p | <i>SORBS2</i>   | AK056758     | 2038-59                 |
| hsa-miR-3144-3p | <i>UGT2A3</i>   | NM_024743    | 2838-59                 |
| hsa-miR-320a    | <i>C6</i>       | J05024       | 3259-80                 |
| hsa-miR-320a    | <i>CYP8B1</i>   | NM_004391    | 3632-53                 |
| hsa-miR-320a    | <i>DDC</i>      | NM_000790    | 1734-55                 |
| hsa-miR-320a    | <i>EDN2</i>     | BC034393     | 990-1007                |
| hsa-miR-320a    | <i>FYN</i>      | NM_002037    | 2236-56                 |
| hsa-miR-320a    | <i>HNF1A</i>    | NM_000545    | 2605-26                 |
| hsa-miR-320a    | <i>HOXA3</i>    | NM_030661    | 2266-87                 |
| hsa-miR-320a    | <i>MAP2K6</i>   | BX641121     | 1148-69                 |
| hsa-miR-320a    | <i>MTMR3</i>    | NM_021090    | 8898-916                |
| hsa-miR-320a    | <i>NQO1</i>     | NM_000903    | 1538-58                 |
| hsa-miR-320a    | <i>RCN3</i>     | AF183423     | 1279-98                 |
| hsa-miR-320a    | <i>RORC</i>     | NM_005060    | 1872-93                 |

|                |                |              |                 |
|----------------|----------------|--------------|-----------------|
| hsa-miR-320a   | <i>SELL</i>    | NM_000655    | 1524-45         |
| hsa-miR-320a   | <i>SLC17A4</i> | AB020527     | 2139-60         |
| hsa-miR-320a   | <i>SORBS2</i>  | NM_003603    | 4120-41         |
| hsa-miR-320a   | <i>TM4SF4</i>  | NM_004617    | 971-92          |
| hsa-miR-320b   | <i>C6</i>      | J05024       | 3259-80         |
| hsa-miR-320b   | <i>CYP8B1</i>  | NM_004391    | 3632-53         |
| hsa-miR-320b   | <i>DDC</i>     | NM_000790    | 1734-55         |
| hsa-miR-320b   | <i>EDN2</i>    | BC034393     | 990-1007        |
| hsa-miR-320b   | <i>FYN</i>     | NM_002037    | 2236-56         |
| hsa-miR-320b   | <i>HNF1A</i>   | NM_000545    | 2605-26         |
| hsa-miR-320b   | <i>HOXA3</i>   | NM_030661    | 2266-87         |
| hsa-miR-320b   | <i>MAP2K6</i>  | BX641121     | 1148-69         |
| hsa-miR-320b   | <i>MTMR3</i>   | NM_021090    | 8898-916        |
| hsa-miR-320b   | <i>NQO1</i>    | NM_000903    | 1538-58         |
| hsa-miR-320b   | <i>RCN3</i>    | AF183423     | 1279-98         |
| hsa-miR-320b   | <i>RORC</i>    | NM_005060    | 1872-93         |
| hsa-miR-320b   | <i>SELL</i>    | NM_000655    | 1524-45         |
| hsa-miR-320b   | <i>SLC17A4</i> | AB020527     | 2139-60         |
| hsa-miR-320b   | <i>TM4SF4</i>  | NM_004617    | 971-92          |
| hsa-miR-320c   | <i>C6</i>      | J05024       | 3259-80         |
| hsa-miR-320c   | <i>CYP8B1</i>  | NM_004391    | 3632-53         |
| hsa-miR-320c   | <i>DDC</i>     | NM_000790    | 1734-55         |
| hsa-miR-320c   | <i>EDN2</i>    | BC034393     | 990-1007        |
| hsa-miR-320c   | <i>FYN</i>     | NM_002037    | 2236-56         |
| hsa-miR-320c   | <i>HNF1A</i>   | NM_000545    | 2605-26         |
| hsa-miR-320c   | <i>HOXA3</i>   | NM_030661    | 2266-87         |
| hsa-miR-320c   | <i>MAP2K6</i>  | BX641121     | 1148-69         |
| hsa-miR-320c   | <i>NQO1</i>    | NM_000903    | 1538-58         |
| hsa-miR-320c   | <i>RCN3</i>    | AF183423     | 1279-98         |
| hsa-miR-320c   | <i>RORC</i>    | NM_005060    | 1872-93         |
| hsa-miR-320c   | <i>SELL</i>    | NM_000655    | 1524-45         |
| hsa-miR-320c   | <i>SLC17A4</i> | AB020527     | 2139-60         |
| hsa-miR-320c   | <i>TM4SF4</i>  | NM_004617    | 971-92          |
| hsa-miR-320d   | <i>C6</i>      | J05024       | 3259-80         |
| hsa-miR-320d   | <i>CYP8B1</i>  | NM_004391    | 3632-53         |
| hsa-miR-320d   | <i>EDN2</i>    | BC034393     | 990-1007        |
| hsa-miR-320d   | <i>HOXA3</i>   | NM_030661    | 2266-87         |
| hsa-miR-320d   | <i>MAP2K6</i>  | BX641121     | 1148-69         |
| hsa-miR-320d   | <i>NQO1</i>    | NM_000903    | 1538-58         |
| hsa-miR-320d   | <i>RCN3</i>    | AF183423     | 1279-98         |
| hsa-miR-320d   | <i>RORC</i>    | NM_005060    | 1872-93         |
| hsa-miR-320d   | <i>SELL</i>    | NM_000655    | 1524-45         |
| hsa-miR-320d   | <i>TM4SF4</i>  | NM_004617    | 971-92          |
| hsa-miR-33b-3p | <i>ARL4C</i>   | AJ579850     | 2000-21         |
| hsa-miR-33b-3p | <i>SLC6A17</i> | NM_001010898 | 5920-41         |
| hsa-miR-33b-3p | <i>UPP2</i>    | AY225131     | 1338-58         |
| hsa-miR-449a   | <i>CEACAM1</i> | NM_001712    | 1835-56         |
| hsa-miR-449a   | <i>ESPN</i>    | NM_031475    | 3384-405        |
| hsa-miR-449a   | <i>FETUB</i>   | NM_014375    | 1436-57         |
| hsa-miR-449a   | <i>GBA3</i>    | NM_020973    | 1917-38         |
| hsa-miR-449a   | <i>HNF4A</i>   | NM_000457    | 1664-85;1755-75 |
| hsa-miR-449a   | <i>IYD</i>     | NM_203395    | 1904-23         |
| hsa-miR-449a   | <i>KRT5</i>    | NM_000424    | 1939-59         |
| hsa-miR-449a   | <i>MASP1</i>   | NM_001879    | 4147-65         |
| hsa-miR-449a   | <i>NQO1</i>    | NM_000903    | 2280-301        |
| hsa-miR-449a   | <i>NRXN2</i>   | NM_138734    | 2519-38         |
| hsa-miR-449a   | <i>TM4SF4</i>  | NM_004617    | 1146-65         |
| hsa-miR-877-5p | <i>AQP9</i>    | NM_020980    | 2373-91         |
| hsa-miR-877-5p | <i>CYP1A1</i>  | AM233518     | 835-55          |
| hsa-miR-877-5p | <i>G6PC</i>    | NM_000151    | 2054-74         |
| hsa-miR-877-5p | <i>MASP1</i>   | NM_139125    | 2994-3015       |
| hsa-miR-877-5p | <i>MAT1A</i>   | NM_000429    | 3229-48         |
| hsa-miR-877-5p | <i>NR1I2</i>   | NM_003889    | 3675-93         |
| hsa-miR-877-5p | <i>OLFML3</i>  | NM_020190    | 1425-46         |

\*Deregulated miRNAs in HepaRG cells treated by 10 mM acetaminophen (Fold changes >2 or <0.5)

#Deregulated genes in HepaRG cells treated by 10 mM acetaminophen (Fold changes >10 or <0.1)

† The representative transcript.

‡ Counting from the transcription start site.

**Supplementary Table 6 Target molecules by transcription factors HNF1A, HNF4A and NR1I2**

| <b>TFs</b> | <b>Genes*</b>   |
|------------|-----------------|
| HNF4A      | <i>ABCA6</i>    |
| HNF4A      | <i>ALDH1A1</i>  |
| NR1I2      | <i>ALDH1A1</i>  |
| HNF1A      | <i>AQP9</i>     |
| HNF4A      | <i>AQP9</i>     |
| HNF4A      | <i>BDH1</i>     |
| HNF4A      | <i>CDH1</i>     |
| HNF4A      | <i>CEACAM1</i>  |
| HNF4A      | <i>CYP1A1</i>   |
| NR1I2      | <i>CYP1A1</i>   |
| HNF4A      | <i>CYP3A4</i>   |
| NR1I2      | <i>CYP3A4</i>   |
| HNF4A      | <i>CYP8B1</i>   |
| HNF1A      | <i>DDC</i>      |
| HNF4A      | <i>ETNK2</i>    |
| HNF4A      | <i>FETUB</i>    |
| HNF1A      | <i>G6PC</i>     |
| HNF4A      | <i>G6PC</i>     |
| NR1I2      | <i>HMGCS2</i>   |
| HNF1A      | <i>HNF1A</i>    |
| HNF4A      | <i>HNF1A</i>    |
| HNF1A      | <i>HNF4A</i>    |
| HNF4A      | <i>HNF4A</i>    |
| NR1I2      | <i>HNF4A</i>    |
| HNF1A      | <i>HNMT</i>     |
| HNF4A      | <i>IFITM2</i>   |
| HNF1A      | <i>MTTP</i>     |
| HNF4A      | <i>MTTP</i>     |
| NR1I2      | <i>MTTP</i>     |
| HNF4A      | <i>NR1I2</i>    |
| NR1I2      | <i>NR1I2</i>    |
| NR1I2      | <i>PIPOX</i>    |
| HNF4A      | <i>RORC</i>     |
| NR1I2      | <i>SERPIND1</i> |
| HNF1A      | <i>SGK2</i>     |
| HNF4A      | <i>SGK2</i>     |
| HNF1A      | <i>SLC10A1</i>  |
| HNF4A      | <i>SLC10A1</i>  |
| HNF1A      | <i>TM4SF4</i>   |
| HNF4A      | <i>TM4SF4</i>   |
| HNF1A      | <i>UGT1A1</i>   |
| HNF4A      | <i>UGT1A1</i>   |
| NR1I2      | <i>UGT1A1</i>   |
| HNF1A      | <i>UGT2A3</i>   |
| HNF4A      | <i>UGT2A3</i>   |
| HNF1A      | <i>A1CF</i>     |
| HNF1A      | <i>AADAC</i>    |
| HNF1A      | <i>ABCC2</i>    |
| HNF1A      | <i>ADH4</i>     |

|       |                  |
|-------|------------------|
| HNF1A | <i>ADH6</i>      |
| HNF1A | <i>AHSG</i>      |
| HNF1A | <i>AKR1C4</i>    |
| HNF1A | <i>ALB</i>       |
| HNF1A | <i>ALDOB</i>     |
| HNF1A | <i>ANGPTL3</i>   |
| HNF1A | <i>ANKS4B</i>    |
| HNF1A | <i>APCS</i>      |
| HNF1A | <i>APOA2</i>     |
| HNF1A | <i>APOB</i>      |
| HNF1A | <i>ASGR1</i>     |
| HNF1A | <i>C14orf105</i> |
| HNF1A | <i>C8A</i>       |
| HNF1A | <i>CPB2</i>      |
| HNF1A | <i>CRP</i>       |
| HNF1A | <i>CYP2E1</i>    |
| HNF1A | <i>F11</i>       |
| HNF1A | <i>FABP1</i>     |
| HNF1A | <i>FGA</i>       |
| HNF1A | <i>FGB</i>       |
| HNF1A | <i>FRK</i>       |
| HNF1A | <i>GJB1</i>      |
| HNF1A | <i>GPX2</i>      |
| HNF1A | <i>HABP2</i>     |
| HNF1A | <i>HAL</i>       |
| HNF1A | <i>HAO1</i>      |
| HNF1A | <i>HGD</i>       |
| HNF1A | <i>HSD17B2</i>   |
| HNF1A | <i>KNG1</i>      |
| HNF1A | <i>LRRC31</i>    |
| HNF1A | <i>NR1H4</i>     |
| HNF1A | <i>ONECUT1</i>   |
| HNF1A | <i>PAH</i>       |
| HNF1A | <i>PCK1</i>      |
| HNF1A | <i>RBP5</i>      |
| HNF1A | <i>SERPINA10</i> |
| HNF1A | <i>SERPINA7</i>  |
| HNF1A | <i>SLC2A2</i>    |
| HNF1A | <i>SLCO1B1</i>   |
| HNF1A | <i>SULT1C2</i>   |
| HNF1A | <i>TAT</i>       |
| HNF1A | <i>TTR</i>       |
| HNF1A | <i>UGT2B15</i>   |
| HNF1A | <i>UGT2B7</i>    |
| HNF1A | <i>VIL1</i>      |
| HNF1A | <i>VNN3</i>      |
| HNF4A | <i>A1CF</i>      |
| HNF4A | <i>ABCC2</i>     |
| HNF4A | <i>ABCG5</i>     |
| HNF4A | <i>ABCG8</i>     |
| HNF4A | <i>ACMSD</i>     |

|       |                |
|-------|----------------|
| HNF4A | <i>ACOX2</i>   |
| HNF4A | <i>ACY3</i>    |
| HNF4A | <i>ADH6</i>    |
| HNF4A | <i>AGXT2</i>   |
| HNF4A | <i>AHSG</i>    |
| HNF4A | <i>AKR1C4</i>  |
| HNF4A | <i>ALDH3A1</i> |
| HNF4A | <i>ALDOB</i>   |
| HNF4A | <i>ANG</i>     |
| HNF4A | <i>APCS</i>    |
| HNF4A | <i>APOA2</i>   |
| HNF4A | <i>APOB</i>    |
| HNF4A | <i>ASGR1</i>   |
| HNF4A | <i>BAAT</i>    |
| HNF4A | <i>CCDC170</i> |
| HNF4A | <i>CCL14</i>   |
| HNF4A | <i>CCL15</i>   |
| HNF4A | <i>CIDEC</i>   |
| HNF4A | <i>CPB2</i>    |
| HNF4A | <i>CYP2B6</i>  |
| HNF4A | <i>CYP2C8</i>  |
| HNF4A | <i>CYP2C9</i>  |
| HNF4A | <i>CYP2E1</i>  |
| HNF4A | <i>CYP3A7</i>  |
| HNF4A | <i>EPS8L3</i>  |
| HNF4A | <i>F11</i>     |
| HNF4A | <i>F13B</i>    |
| HNF4A | <i>FABP1</i>   |
| HNF4A | <i>FGA</i>     |
| HNF4A | <i>FGB</i>     |
| HNF4A | <i>FRK</i>     |
| HNF4A | <i>GDF15</i>   |
| HNF4A | <i>GJB1</i>    |
| HNF4A | <i>GLYAT</i>   |
| HNF4A | <i>GPX2</i>    |
| HNF4A | <i>GYS2</i>    |
| HNF4A | <i>HAL</i>     |
| HNF4A | <i>HAO1</i>    |
| HNF4A | <i>HGD</i>     |
| HNF4A | <i>HPD</i>     |
| HNF4A | <i>HSD17B2</i> |
| HNF4A | <i>IL22RA1</i> |
| HNF4A | <i>IRF6</i>    |
| HNF4A | <i>KNG1</i>    |
| HNF4A | <i>LAD1</i>    |
| HNF4A | <i>NR1H4</i>   |
| HNF4A | <i>NR1I3</i>   |
| HNF4A | <i>ONECUT1</i> |
| HNF4A | <i>OTC</i>     |
| HNF4A | <i>PCK1</i>    |
| HNF4A | <i>PDZK1</i>   |

|       |                   |
|-------|-------------------|
| HNF4A | <i>PLA2G12B</i>   |
| HNF4A | <i>PON1</i>       |
| HNF4A | <i>PPP1R14D</i>   |
| HNF4A | <i>PRODH2</i>     |
| HNF4A | <i>RBP5</i>       |
| HNF4A | <i>SERPINA10</i>  |
| HNF4A | <i>SERPINA4</i>   |
| HNF4A | <i>SLC22A18AS</i> |
| HNF4A | <i>SLC2A2</i>     |
| HNF4A | <i>SPP1</i>       |
| HNF4A | <i>SULT1A1</i>    |
| HNF4A | <i>SULT1C2</i>    |
| HNF4A | <i>SULT2A1</i>    |
| HNF4A | <i>TAT</i>        |
| HNF4A | <i>THPO</i>       |
| HNF4A | <i>TMEM176A</i>   |
| HNF4A | <i>TTR</i>        |
| HNF4A | <i>UGT2B15</i>    |
| NR1I2 | <i>ABCC2</i>      |
| NR1I2 | <i>ANG</i>        |
| NR1I2 | <i>CYP2B6</i>     |
| NR1I2 | <i>CYP2C19</i>    |
| NR1I2 | <i>CYP2C8</i>     |
| NR1I2 | <i>CYP2C9</i>     |
| NR1I2 | <i>CYP3A7</i>     |
| NR1I2 | <i>FMO5</i>       |
| NR1I2 | <i>NR1H4</i>      |
| NR1I2 | <i>NR1I3</i>      |
| NR1I2 | <i>SLC22A7</i>    |
| NR1I2 | <i>SLCO1B1</i>    |
| NR1I2 | <i>SULT2A1</i>    |

---

\*Data obtained from IPA software

Supplementary Table 7

Primers or Oligos used in this study

| No. | Name                   | Sequence (5'–3')                                        | Purpose              |
|-----|------------------------|---------------------------------------------------------|----------------------|
| 1   | miR-122-5p-RT-F        | UGGAGTGTGACAATGGTGTTTG                                  | qRT-PCR              |
| 2   | miR-194-5p-RT-F        | TGTAACAGCAACTCCATGTGGA                                  | qRT-PCR              |
| 3   | miR-224-5p-RT-F        | CAAGTCACTAGTGGTCCGTT                                    | qRT-PCR              |
| 4   | miR-449a-RT-F          | TGGCAGTGTATTGTTAGCTGGT                                  | qRT-PCR              |
| 5   | miR-320a-RT-F          | AAAAGCTGGGTTGAGAGGGCGA                                  | qRT-PCR              |
| 6   | miR-877-5p-RT-F        | GTAGAGGAGATGGCGCAGGG                                    | qRT-PCR              |
| 7   | U6-RT-F                | CTCGCTTCGGCAGCAC                                        | qRT-PCR              |
| 8   | U6-RT-R                | AACGCTTCACGAATTTGCGT                                    | qRT-PCR              |
| 9   | CYP2A6-RT-F            | CCCTCATGAAGATCAGTGAGC                                   | qRT-PCR              |
| 10  | CYP2A6-RT-R            | GCGCTCCCCGTTGCTGAATA                                    | qRT-PCR              |
| 11  | GSTT1-RT-F             | AGAGTTGGATGTGACCCTGCA                                   | qRT-PCR              |
| 12  | GSTT1-RT-R             | TCAGCTAAGGAGATGTGAGGACC                                 | qRT-PCR              |
| 13  | GSTM1-RT-F             | CTATGATGTCCCTTGACCTCCACCGTATA                           | qRT-PCR              |
| 14  | GSTM1-RT-R             | ATGTTACGAAGGATAGTGGGTAGCTGA                             | qRT-PCR              |
| 15  | SULT1A4-RT-F           | GCCGCACCCACCTGTTCTC                                     | qRT-PCR              |
| 16  | SULT1A4-RT-R           | TGAGCTCCTGGGGACGGTG                                     | qRT-PCR              |
| 17  | UGT1A1-2RT-F           | CATGCTGGGAAGATACTGTTGAT                                 | qRT-PCR              |
| 18  | UGT1A1-2RT-R           | GCCCGAGACTAACAAAAGACTCT                                 | qRT-PCR              |
| 19  | UGT1A6-RT-F            | ACTTTGGGGCATGGTTGTAG                                    | qRT-PCR              |
| 20  | UGT1A6-RT-R            | TGGTCATACGGCACTGGATA                                    | qRT-PCR              |
| 21  | UGT1A9-RT-F            | CCCCCTTCTCTATGTGTGTG                                    | qRT-PCR              |
| 22  | UGT1A9-RT-R            | TCATACTCCGTAACAGGTGTTTTG                                | qRT-PCR              |
| 23  | SULT2A1-RT-F           | TGAGTTCGTGATAAGGGATGAA                                  | qRT-PCR              |
| 24  | SULT2A1-RT-R           | CAGATGGGCACAGATTGGAT                                    | qRT-PCR              |
| 25  | UGT2B15-RT-F           | GAAAATTCGATAGATGGATATATGGTG                             | qRT-PCR              |
| 26  | UGT2B15-RT-R           | AACTGCATCTTTACAGAGCTTGTACTG                             | qRT-PCR              |
| 27  | UGT1A1-RT-F            | GCTTTTGTCTGGCTGTCCCACT                                  | qRT-PCR              |
| 28  | UGT1A1-RT-R            | TCGAAGGCATGTGATCTGAATGAGA                               | qRT-PCR              |
| 29  | CYP2E1-RT-F            | ACGGTATCACCGTGACTGGG                                    | qRT-PCR              |
| 30  | CYP2E1-RT-R            | GCATCTCTTGCCTATCCTTGA                                   | qRT-PCR              |
| 31  | SULT1A1-RT-F           | AGGAGTTCATGGACCACAGC                                    | qRT-PCR              |
| 32  | SULT1A1-RT-R           | TGAAGGTGGTCTTCCAGTCC                                    | qRT-PCR              |
| 33  | HNF1A-RT-F             | AGTGAGTCCGGGCTTCACAC                                    | qRT-PCR              |
| 34  | HNF1A-RT-R             | TGAAGGTCTCGATGACGCTG                                    | qRT-PCR              |
| 35  | HNF4A-RT-F             | GTACTCCTGCAGATTTAGCC                                    | qRT-PCR              |
| 36  | HNF4A-RT-R             | CTGTCCCTCATAGCTTGACCT                                   | qRT-PCR              |
| 37  | CYP3A4-RT-F            | TGTGCCCTGAGAACCACAGAG                                   | qRT-PCR              |
| 38  | CYP3A4-RT-R            | GTGGTGGAATAGTCCCGTG                                     | qRT-PCR              |
| 39  | NR1I2-RT-F             | TGCGAGATCACCCGGAAGAC                                    | qRT-PCR              |
| 40  | NR1I2-RT-R             | ATGGGAGAAGGTAGTGTCAAAGG                                 | qRT-PCR              |
| 41  | GAPDH-RT-F             | GAAATCCATCACCTCTCCAGG                                   | qRT-PCR              |
| 42  | GAPDH-RT-R             | GAGCCCCAGCCTTCTCCATG                                    | qRT-PCR              |
| 43  | CYP3A4-long-F          | GGGAAAGUTTCTAAGGACTTCTGCTTTGC                           | Reporter gene assays |
| 44  | CYP3A4-long-R          | GGAGACAUGCAGTCCACCATGCCTAGC                             | Reporter gene assays |
| 45  | CYP3A4-M-F             | GAAAGTTAATCCACTGTCTATTGCCATGTTTAGAAAG                   | Reporter gene assays |
| 46  | CYP3A4-M-R             | CTTTCTAAACAATGGGCAAATAGACAGTGGATTAACCTTC                | Reporter gene assays |
| 47  | HNF1A-long-F           | GGGAAAGUTGGAGAGCTAGGAGCAAAGC                            | Reporter gene assays |
| 48  | HNF1A-long-R           | GGAGACAUAGGGTAGACGCGGTACACTG                            | Reporter gene assays |
| 49  | HNF1A-M-F              | CTCTCCCAGGCCCATGAAATCGTCTTCTGTATTGTTC                   | Reporter gene assays |
| 50  | HNF1A-M-R              | GGAAACAATACAGGAACCGCATTTTCATGGGCCTGGGAGAG               | Reporter gene assays |
| 51  | HNF4A-long-F           | GGGAAAGUCCATACCAAGCAGGAAGTT                             | Reporter gene assays |
| 52  | HNF4A-long-R           | GGAGACAUGAGAAGACGGGATGGCTGAG                            | Reporter gene assays |
| 53  | NR1I2-M-F              | GAGTATCTGTGGGAGTAAATAGAGAGATGAGAAG                      | Reporter gene assays |
| 54  | NR1I2-M-R              | CTTCTCATCTCTATTTTACTCCACAGATACTC                        | Reporter gene assays |
| 55  | NR1I2-long-F           | GGGAAAGUTGGGTGACACCTCCGAGA                              | Reporter gene assays |
| 56  | NR1I2-long-R           | GGAGACAUAACCTCTGTGACTCAGGATC                            | Reporter gene assays |
| 57  | HNF4A-M1685-F          | CTAAGGGCCACATCCCACAACACCCCTTGACGCCCTGC                  | Reporter gene assays |
| 58  | HNF4A-M1685-R          | GCAGGGCGTCAAGGGTGTGTTGGGATGTGGCCCTTAG                   | Reporter gene assays |
| 59  | HNF4A-M1775-F          | TTCTCATGTTGAAGCCACAACTTCACCTTCACCTTCATC                 | Reporter gene assays |
| 60  | HNF4A-M1775-R          | GATGAAGGTGAAGGTGAAGTTTGTGGCTCAACATGAGAA                 | Reporter gene assays |
| 61  | Dye-CYP3A4-224-TAR     | /5Cy55/ mAmGmUmUmAmAmUmCmCmAmCmUmGmUmGmAmCmUmUmU        | RNA EMSAs            |
| 62  | Dye-HNF1A-320-TAR      | /5Cy55/mGmGmCmCmCmCmAmUmGmAmCmCmUmCmCmAmGmCmUmUr        | RNA EMSAs            |
| 63  | Dye-HNF4A-449-TAR-1664 | /5Cy55/ mUmAmAmGmGmGmCmCmAmCmAmUmCmCmAmCmUmGmCm         | RNA EMSAs            |
| 64  | Dye-HNF4A-449-TAR-1775 | /5Cy55/ mCmUmCmAmUmGmUmUmGmAmAmGmCmCmAmCmUmGmCmCm       | RNA EMSAs            |
| 65  | Dye-NR1I2-877-TAR      | /5Cy55/mAmUmCmUmGmUmGmGmAmGmUmCmCmUmCmUmAmG             | RNA EMSAs            |
| 66  | Dye-hsa-miR-224-5p     | /5IRD800CWN/ rCrArArGrUrCrArCrUrArGrUrGrUrCrCrGrUrU     | RNA EMSAs            |
| 67  | Dye-hsa-miR-320a       | /5IRD800CWN/ rArArArArGrCrUrGrGrUrUrGrArGrArGrGrCrGrA   | RNA EMSAs            |
| 68  | Dye-hsa-miR-449a       | /5IRD800CWN/ rUrGrGrCrArGrUrGrUrArUrUrGrUrArGrCrUrGrGrU | RNA EMSAs            |
| 69  | Dye-hsa-miR-877-5p     | /5IRD800CWN/ rGrUrArGrArGrArGrArUrGrGrCrCrArGrGrG       | RNA EMSAs            |
| 70  | Cold-hsa-miR-224-5p    | rCrArArGrUrCrArCrUrArGrUrGrUrUrCrCrGrUrU                | RNA EMSAs            |
| 71  | Cold-hsa-miR-320a      | rArArArArGrCrUrGrGrUrUrGrArGrArGrGrCrGrA                | RNA EMSAs            |
| 72  | Cold-hsa-miR-449a      | rUrGrGrCrArGrUrGrUrArUrUrGrUrArGrCrUrGrGrU              | RNA EMSAs            |



|                         |                                                      |                                        |
|-------------------------|------------------------------------------------------|----------------------------------------|
| 73 Cold-hsa-miR-877-5p  | rGrUrArGrArGrGrArGrArUrGrGrCrGrCrArGrGrG             | RNA EMSAs                              |
| 74 Cold-NC              | rUrCrArCrArArCrCrUrCrCrUrArGrArArGrArGrUrArGrA       | RNA EMSAs                              |
| 75 Bio-miR-224-Duplex-F | rCrArArGrUrCrArCrUrArGrUrGrGrUrUrCrCrGrUrU/3Bio/     | Capture by biotinylated miRNA duplexes |
| 76 Bio-miR-224-Duplex-R | rCrGrGrArArCrGrArCrUrArGrUrGrArCrUrArGrArG           | Capture by biotinylated miRNA duplexes |
| 77 Bio-miR-320-Duplex-F | rArArArArGrCrUrGrGrGrUrUrGrArGrArGrGrCrGrA/3Bio/     | Capture by biotinylated miRNA duplexes |
| 78 Bio-miR-320-Duplex-R | rGrCrCrCrUrCrArCrArArCrCrArGrCrUrUrArUrArG           | Capture by biotinylated miRNA duplexes |
| 79 Bio-miR-449-Duplex-F | rUrGrGrCrArGrUrGrUrArUrUrGrUrUrArGrCrUrGrGrU/3Bio/   | Capture by biotinylated miRNA duplexes |
| 80 Bio-miR-449-Duplex-R | rCrArGrCrUrArUrCrArArUrArCrArCrUrGrCrGrArArG         | Capture by biotinylated miRNA duplexes |
| 81 Bio-miR-877-Duplex-F | rGrUrArGrArGrGrArGrArUrGrGrCrGrCrArGrGrG/3Bio/       | Capture by biotinylated miRNA duplexes |
| 82 Bio-miR-877-Duplex-R | rCrUrGrCrGrCrGrArUrCrUrCrCrUrCrUrUrCrArG             | Capture by biotinylated miRNA duplexes |
| 83 Bio-miR-NC-Duplex-F  | rUrCrArCrArArCrCrUrCrUrArGrArArArGrArGrUrArGrA/3Bio/ | Capture by biotinylated miRNA duplexes |
| 84 Bio-miR-NC-Duplex-R  | rUrArCrUrCrUrCrUrArGrGrArGrGrUrUrGrUrCrArArG         | Capture by biotinylated miRNA duplexes |
